# Supplementary material for: Lemniscular carbon nanohoops with contiguous conjugation from planar chiral [2.2]paracyclophane: influence of the regioselective synthesis on topological chirality
Source: Royal Society of Chemistry journal article supplement (doi:10.1039/d2sc06825g), 2023-01-01
Supplement: d2sc06825g1.pdf [file d2sc06825g1.pdf]

## SUPPORTING INFORMATION

---

### **Lemniscular Carbon Nanohoops with Contiguous Conjugation from Planar Chiral [2.2]Paracyclophane: Influence of the Regioselective Synthesis on Topological Chirality**

Jing He,<sup>†</sup> Mo-Han Yu,<sup>‡</sup> Zhe Lian,<sup>†</sup> Yan-Qing Fan,<sup>†</sup> Sheng-Zhu Guo,<sup>†</sup> Xiao-Nan Li,<sup>†</sup> Wen-Guang Wang,<sup>†</sup> Ying Wang,<sup>†</sup> Zhi-Yun Cheng,<sup>§</sup> Hua Jiang<sup>\*,†</sup>.

<sup>†</sup>College of Chemistry, Beijing Normal University, Beijing 100875 (P.R. China)

<sup>‡</sup>College of Chemistry and Chemical Engineering, Liaoning Normal University, Dalian 116029 (P.R. China)

<sup>§</sup>School of Mathematical Sciences, Beijing Normal University, Beijing 100875 (P.R. China)

---

**Table of Contents**

|                                                                                |    |
|--------------------------------------------------------------------------------|----|
| 1. Experimental Procedures.....                                                | 3  |
| 1.1 General Procedures and Materials.....                                      | 3  |
| 1.2 Synthetic Procedures .....                                                 | 3  |
| 2. Results and Discussion .....                                                | 10 |
| 2.1 Planar chiral 4,7,12,15-tetrasubstituted [2.2]PCP .....                    | 10 |
| 2.2 Topological transformation .....                                           | 10 |
| 2.3 Comparison of the <sup>1</sup> H NMR spectra.....                          | 10 |
| 2.4 X-ray Crystallography .....                                                | 18 |
| 2.5 Details of HPLC Experiments .....                                          | 21 |
| 2.6 Photophysical Properties .....                                             | 23 |
| 2.7 Comparison of  g <sub>lum</sub>   of some CPL-active organic molecules.... | 24 |
| 2.8 Computational details and results.....                                     | 25 |
| 2.9 <sup>1</sup> H and <sup>13</sup> C NMR Spectra.....                        | 51 |
| References .....                                                               | 62 |

## 1. Experimental Procedures

### 1.1 General Procedures and Materials.

All starting chemicals were obtained from commercial sources and used without further purification, unless indicated otherwise. Per-deuterated solvents for NMR spectroscopy were obtained from Cambridge Isotope Laboratories. Anhydrous triethylamine (TEA) was distilled over calcium hydride (CaH<sub>2</sub>) under Ar. Anhydrous tetrahydrofuran (THF) was distilled over sodium (Na) and benzophenone under Ar. Compound **1**,<sup>S1</sup> **bis-po-3**,<sup>S2</sup> **bis-pm-3**,<sup>S3</sup> were prepared according to the literatures. Columns for HPLC are specified in the corresponding sections. Column chromatography was carried out on flash grade silica gel, using 0 - 20 psig pressure. Analytical TLC was carried out using tapered silica plates with a preadsorbent zone. NMR spectra were obtained with JEOL Delta (400 MHz and 600 MHz) using chloroform-*d* (CDCl<sub>3</sub>) as solvent. The chemical shift references were as follows: (<sup>1</sup>H) chloroform-*d*, 7.26 ppm; (<sup>13</sup>C) chloroform-*d*, 77.00 ppm (chloroform-*d*). Mass spectra (ESI, MALDI) were acquired on GCT and FTICR spectrometer (Bruker Daltonics Inc. APEXII, BIFLEX III), respectively. Fluorescence spectra were measured on FS5 and FLS980, and UV-Vis spectra were recorded on Shimadzu UV-3600. CD spectra were recorded on a Chirascan<sup>TM</sup> Circular Dichroism spectrometer (Applied Photophysics Ltd, Surrey, United Kingdom). CPL spectra were gained with Chirascan-CPL, Applied Photophysics.

### 1.2 Synthetic Procedures

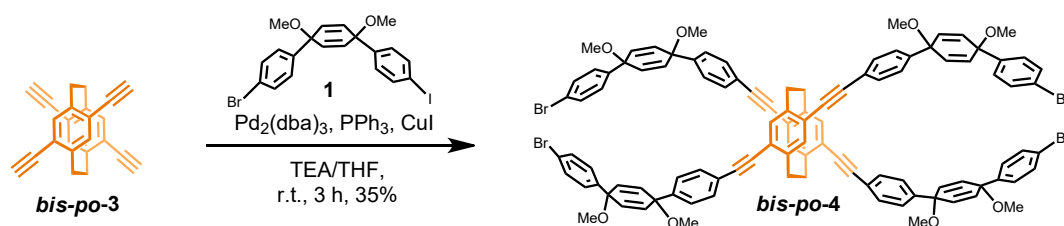

Compound **bis-po-3** (200.00 mg, 0.658 mmol), Compound **1** (1307.9 mg, 2.632 mmol), Pd<sub>2</sub>(dba)<sub>3</sub> (60.26 mg, 0.066 mmol, 0.1 equiv), PPh<sub>3</sub> (69.27 mg, 0.263 mmol), CuI (25.00 mg, 0.132 mmol) were added to a dried flask. The flask was evacuated and backfilled with Ar three times. After cooling to 0°C, the dried THF (44 mL) and TEA (11 mL) was added to the reaction. The mixture was stirred for 12 h on room temperature. The reaction was quenched with water and extracted with ethyl acetate three times. The combined organic layer was washed with brine, dried with Na<sub>2</sub>SO<sub>4</sub>, and evaporated under reduce pressure. The crude solid was purified by column chromatography on silica gel (EA/PE, 1/6, v/v) to get **bis-po-4** as a yellow powder (406.1 mg, 35%).

R<sub>f</sub> = 0.25 (EA/PE = 1/3, v/v). M.p. = 76-77 °C.

<sup>1</sup>H NMR (400 MHz, CDCl<sub>3</sub>, 298 K) δ = 7.53 (d, J = 8.3 Hz, 8H), 7.46 (d, J = 8.5 Hz, 8H), 7.41 (d, J = 8.4 Hz, 8H), 7.29 (d, J = 8.5 Hz, 8H), 7.12 (s, 4H), 6.18-6.06 (m, 16H), 3.56 (s, 4H), 3.44 (d, J = 4.5 Hz, 24H), 3.08 (s, 4H). <sup>13</sup>C NMR (150 MHz, CDCl<sub>3</sub>, 298 K), δ = 143.6, 142.5, 142.1, 134.7, 133.5, 133.4, 133.3, 131.7, 131.7, 131.6, 131.0, 128.9, 127.9, 126.2, 126.2, 125.2, 123.1, 121.8, 94.5, 89.6, 77.3, 77.1, 76.9, 74.8, 74.6, 65.6, 52.1 32.8. HRMS (MALDI-TOF) calculated for C<sub>104</sub>H<sub>85</sub>Br<sub>4</sub>O<sub>8</sub> [M]<sup>+</sup>: 1778.2967, found 1778.2982.

## SUPPORTING INFORMATION

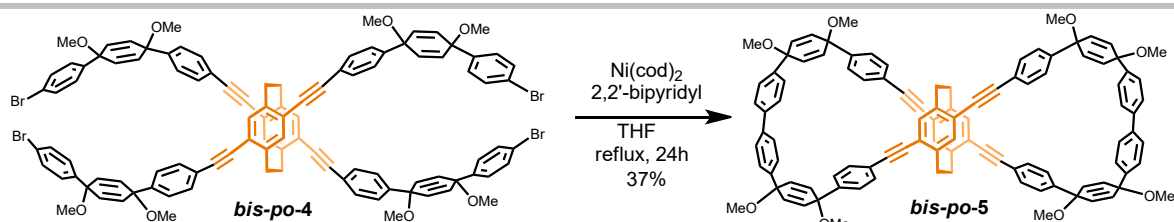

In a nitrogen-filled glove bag, **bis-po-4** (456 mg, 0.26 mmol), Ni(cod)<sub>2</sub> (352 mg, 1.3 mmol), 2,2'-bipyridyl (200 mg, 1.3 mmol) were added to a 500 mL two-necked flask containing a magnetic stirring bar and equipped with a condenser. The flask was sealed with a septum and transferred out of glove bag. After dry THF (270 mL) was added to the flask via syringe through a septum, the mixture was refluxed for 24 h. The reaction mixture was cooled down to room temperature and filtered through a short pad of silica gel with ethyl acetate/CHCl<sub>3</sub>. The solvent was evaporated under reduce pressure to give a crude product, and then was purified by column chromatography on silica gel (PE/ EA, 5/1, v/v) to get a white solid (140.6 mg, 37%).

R<sub>f</sub> = 0.22 (EA/PE = 1/2, v/v). M.p. = 232-233 °C.

<sup>1</sup>H NMR (400 MHz, Chloroform-*d*, 298K) δ = 7.56 (d, *J* = 8.4 Hz, 8H), 7.49 (d, *J* = 8.3 Hz, 8H), 7.43 (d, *J* = 8.4 Hz, 8H), 7.36 (d, *J* = 8.3 Hz, 8H), 7.04 (s, 4H), 6.31 (dd, *J* = 10.3, 2.0 Hz, 4H), 6.18 – 6.09 (m, 12H), 3.69-3.61 (m, 4H), 3.48 (d, *J* = 7.3 Hz, 24H), 3.19-3.07 (m, 4H). <sup>13</sup>C NMR (100 MHz, Chloroform-*d*, 298K) δ = 143.2, 142.5, 141.8, 140.2, 135.2, 134.1, 133.0, 132.1, 131.6, 127.1, 126.7, 126.5, 124.6, 123.0, 94.5, 89.2, 77.4, 77.1, 76.8, 75.5, 75.4, 52.3, 52.1, 29.8. HRMS (MALDI-TOF) calculated for C<sub>104</sub>H<sub>84</sub>O<sub>8</sub> [M]<sup>+</sup>: 1461.6200, found 1461.6221.

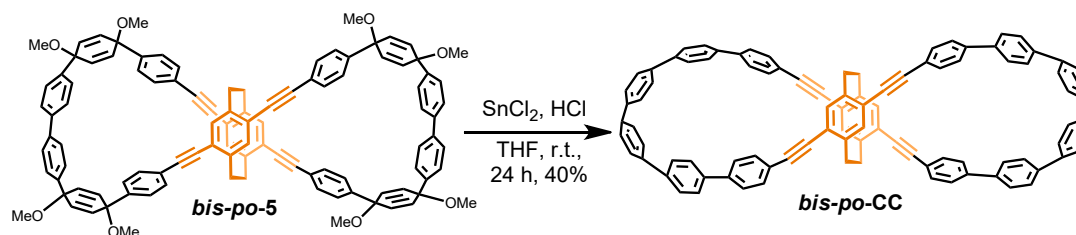

A H<sub>2</sub>SnCl<sub>4</sub>/THF solution was freshly prepared by dissolving anhydrous SnCl<sub>2</sub> (521.5 mg, 2.75 mmol) in 9 ml anhydrous THF under nitrogen atmosphere and then adding concentrated HCl (aq) (0.4 ml) to the solution. The resulting solution was deoxygenated and stirred for 15 minutes before use. **Bis-po-5** (80.2 mg, 0.055 mmol) was dissolved in anhydrous THF (15 ml) under a nitrogen atmosphere and the freshly prepared H<sub>2</sub>SnCl<sub>4</sub>/THF solution (9.4 ml) was added to this solution. The reaction mixture was stirred at room temperature. The reaction mixture was stirred at room temperature for 36 h before being quenched with NaOH/H<sub>2</sub>O solution. The aqueous layer was extracted with dichloromethane and the organic layers were combined and dried with anhydrous Na<sub>2</sub>SO<sub>4</sub>. The crude mixture was purified by column chromatography (SiO<sub>2</sub>, DCM/ petroleum ether, 1/5) to get **bis-po-CC** as a light yellow solid (26.7 mg, 40%).

R<sub>f</sub> = 0.20 (DCM/PE = 1/2, v/v). M.p. > 300 °C.

<sup>1</sup>H NMR (600 MHz, Chloroform-*d*, 298K) δ = 7.61 (m, *J* = 8.7 Hz, 4H), 7.53 (m, 20H), 7.45 (d, *J* = 8.7 Hz, 8H), 7.40 (d, *J* = 8.4 Hz, 8H), 7.37 (d, *J* = 8.4 Hz, 8H), 6.98 (s, 4H), 3.56 (m, 4H), 3.11 – 3.01 (m, 4H). <sup>13</sup>C NMR (150 MHz, Chloroform-*d*, 298K) δ = 141.6, 140.0, 139.6, 138.9, 138.2, 137.8, 136.7, 131.9, 127.7, 127.0, 123.9, 122.4, 91.9, 89.6, 34.8, 33.7. HRMS (MALDI-TOF) calculated for C<sub>96</sub>H<sub>60</sub> [M]<sup>+</sup>: 1213.4729, found 1213.4770.

## SUPPORTING INFORMATION

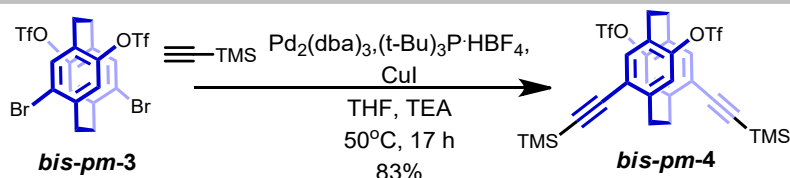

A mixture of **bis-pm-3**<sup>S3</sup> (3.14 g, 4.74 mmol), Pd<sub>2</sub>(dba)<sub>3</sub> (869.9 mg, 0.95 mmol), t-Bu<sub>3</sub>P·HBF<sub>4</sub> (549.8 mg, 1.89 mmol), CuI (180.5 mg, 0.95 mmol), THF (65 mL) and Et<sub>3</sub>N (65 mL) was placed in a round-bottom flask equipped with a magnetic stirring bar. After degassing the reaction mixture several times, (trimethylsilyl)acetylene (9.5 mL 68.77 mmol) was added to the mixture. The reaction was carried out at 50 °C with stirring for 17 h. After the reaction mixture was cooled to room temperature, precipitates were removed by filtration, and the solvent was removed with a rotary evaporator. The residue was purified by column chromatography on SiO<sub>2</sub> (CH<sub>2</sub>Cl<sub>2</sub>/hexane = 1/100 v/v as an eluent) to afford **bis-pm-4** as a light yellow solid (2.74 g, 83%).

R<sub>f</sub> = 0.20 (PE). M.p. = 81-82 °C.

<sup>1</sup>H NMR (600 MHz, Chloroform-*d*, 298K) δ = 7.00 (s, 2H), 6.78 (s, 2H), 3.38 (m, 4H), 2.93 (m, 4H), 0.31 (s, 18H). <sup>13</sup>C NMR (150 MHz, Chloroform-*d*, 298K) δ = 147.9, 145.6, 136.9, 132.0, 126.1, 125.0, 121.9, 119.8, 117.7, 115.6, 113.8, 102.5, 101.0, 31.9, 29.7. HRMS (MALDI-TOF) calculated for C<sub>28</sub>H<sub>30</sub>F<sub>6</sub>O<sub>6</sub>Si<sub>2</sub> [M]<sup>+</sup>: 696.0927, found 696.0923.

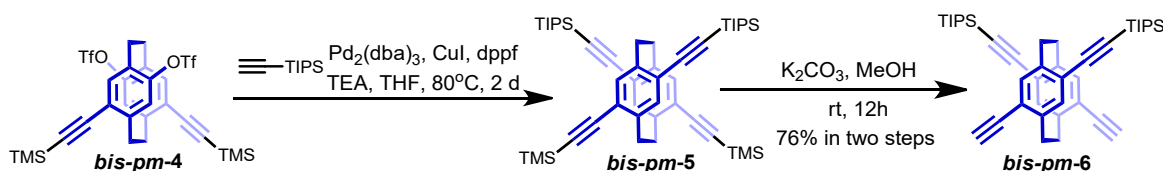

A mixture of **bis-pm-4** (2.74 g, 3.93 mmol), Pd<sub>2</sub>(dba)<sub>3</sub> (720.61 mg, 0.79 mmol), dppf (871.5 mg, 1.57 mmol), CuI (149.4 mg, 0.79 mmol), THF (92 mL) and Et<sub>3</sub>N (92 mL) was placed in a round-bottom flask equipped with a magnetic stirring bar. After degassing the reaction mixture several times, triisopropylsilylacetylene (9.0 mL, 39.3 mmol) was added to the mixture via syringe. The reaction was carried out at 80 °C for 2 d with stirring. After the reaction mixture was cooled to room temperature, precipitates were removed by filtration, and the solvent was removed with a rotary evaporator. The residue was purified by column chromatography on SiO<sub>2</sub> (hexane as an eluent) to afford **bis-pm-5**.

K<sub>2</sub>CO<sub>3</sub> (3.7 g, 27 mmol) was added to a suspension of **bis-pm-5** (3.93 mmol) in MeOH (1600 mL) and CH<sub>2</sub>Cl<sub>2</sub> (160 mL). After the mixture was stirred for 12 h at room temperature, H<sub>2</sub>O was added to the reaction mixture. The organic layer was extracted with CHCl<sub>3</sub> and washed with brine. The combined organic layer was dried over Na<sub>2</sub>SO<sub>4</sub>. Na<sub>2</sub>SO<sub>4</sub> was removed by filtration, and the solvent was removed with a rotary evaporator. The residue was purified by column chromatography on SiO<sub>2</sub> (hexane as an eluent) to afford **bis-pm-6** as a white solid (2.3 g, 76% in two steps).

R<sub>f</sub> = 0.30 (PE). M.p. = 76-77 °C.

<sup>1</sup>H NMR (400 MHz, Chloroform-*d*, 298 K) δ = 7.08 (s, 2H), 7.02 (s, 2H), 3.51-3.34 (m, 4H), 3.30 (s, 2H), 3.05-2.90 (m, 4H), 1.18 (s, 42H). <sup>13</sup>C NMR (100 MHz, Chloroform-*d*, 298 K) δ = 142.5, 142.2, 135.1, 134.9, 126.0, 124.1, 106.3, 96.0, 83.0, 81.9, 32.3, 32.1, 18.9, 18.9, 11.6. HRMS (MALDI-TOF) calculated for C<sub>42</sub>H<sub>56</sub>Si<sub>2</sub> [M]<sup>+</sup>: 616.3921, found 616.3915.

## SUPPORTING INFORMATION

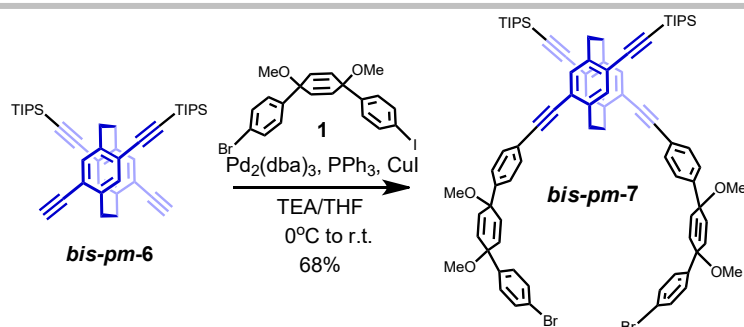

Compound **bis-pm-6** (1.0 g, 1.62 mmol), compound **1** (2.0 g, 4.05 mmol), Pd<sub>2</sub>(dba)<sub>3</sub> (148.3 mg, 0.16 mmol), PPh<sub>3</sub> (170.6 mg, 0.65 mmol), CuI (61.6 mg, 0.32 mmol) were added to a dried flask. The flask was evacuated and backfilled with Ar three times. After cooling to 0°C, the dried THF (64 mL) and TEA (16 mL) was added to the reaction. The mixture was stirred for 3 h on room temperature. The reaction was quenched with water and extracted with ethyl acetate three times. The combined organic layer was washed with brine, dried with sodium sulfate, and evaporated under reduce pressure. The crude product was purified by column chromatography on silica gel (EA/PE, 1/10, v/v) to get a yellow solid **bis-pm-7** (1.5 g, 68%).

R<sub>f</sub> = 0.23 (EA/PE = 1/5, v/v). M.p. = 81-82 °C.

<sup>1</sup>H NMR (600 MHz, Chloroform-*d*, 298K) δ = 7.51 (d, *J* = 8.3 Hz, 4H), 7.46 (d, *J* = 8.5 Hz, 4H), 7.39 (d, *J* = 8.2 Hz, 4H), 7.29 (d, *J* = 8.5 Hz, 4H), 7.09 (d, *J* = 17.4 Hz, 4H), 6.12 (m, 8H), 3.57-3.46 (m, 5H), 3.45 (d, *J* = 9.2 Hz, 11H), 3.10-2.99 (m, 4H), 1.20 (s, 42H). <sup>13</sup>C NMR (100 MHz, Chloroform-*d*, 298K) δ = 143.6, 142.6, 142.5, 142.1, 135.3, 134.3, 133.7, 133.6, 133.5, 133.3, 131.8, 131.6, 128.0, 126.2, 125.4, 125.3, 123.1, 121.9, 106.7, 95.8, 94.5, 89.5, 74.6, 52.2, 32.8, 32.5, 19.1, 11.7. HRMS (MALDI-TOF) calculated for C<sub>82</sub>H<sub>90</sub>Br<sub>2</sub>O<sub>4</sub>Si<sub>2</sub> [M]<sup>+</sup>: 1354.4724, found 1354.4701.

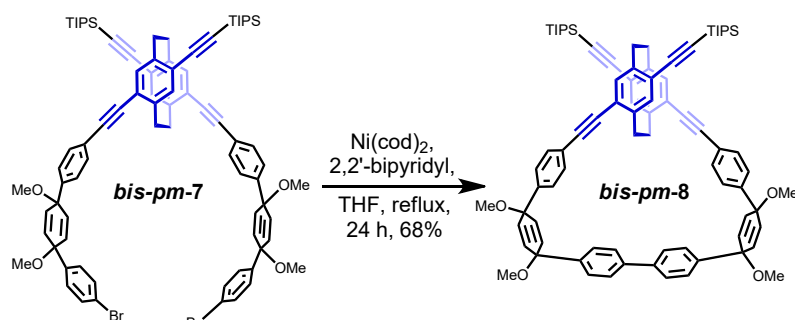

In a nitrogen-filled glove bag, **bis-pm-7** (860 mg, 0.64 mmol), Ni(cod)<sub>2</sub> (440 mg, 1.61 mmol), 2,2'-bipyridyl (249 mg, 1.61 mmol) were added to a 1000 mL two-necked flask containing a magnetic stirring bar and equipped with a condenser. The flask was sealed with a septum and transferred out of glove bag. After dry THF (640 mL) was added to the flask via syringe through a septum, the mixture was refluxed for 24 h. The reaction mixture was cooled down to room temperature and filtered through a short pad of silica gel with ethyl acetate/CHCl<sub>3</sub>. The solvent was evaporated under reduce pressure to give a crude product, and then was purified by column chromatography on silica gel (PE/ EA, 5/1, v/v) to get **bis-pm-8** as a white solid (520.4 mg, 68%).

R<sub>f</sub> = 0.22 (EA/PE = 1/5, v/v). M.p. = 166-167 °C.

<sup>1</sup>H NMR (400 MHz, Chloroform-*d*, 298K) δ = 7.62 (d, *J* = 8.4 Hz, 4H), 7.50 (d, *J* = 8.4 Hz, 4H), 7.44 (d, *J* = 8.4 Hz, 4H), 7.38 (d, *J* = 8.4 Hz, 4H), 7.06 (s, 2H), 6.99 (s, 2H), 6.27 (m, 2H), 6.19 (m, 2H), 6.12 (m, 4H), 3.49 (d, *J* = 14.1 Hz, 16H), 3.11-2.92 (m, 4H), 1.23 (s, 42H). <sup>13</sup>C NMR (100 MHz, Chloroform-*d*, 298K) δ = 143.7, 143.4, 142.5, 140.0, 135.7, 134.6, 134.2, 133.3, 132.9, 131.9, 131.3, 127.0, 126.5, 125.2, 123.0, 106.9, 96.5, 96.1, 91.2, 75.6, 75.0, 52.3, 52.1, 33.0, 32.5, 19.1, 11.7. HRMS (MALDI-TOF) calculated for C<sub>82</sub>H<sub>90</sub>O<sub>4</sub>Si<sub>2</sub> [M]<sup>+</sup>: 1194.6318, found 1194.6368.

## SUPPORTING INFORMATION

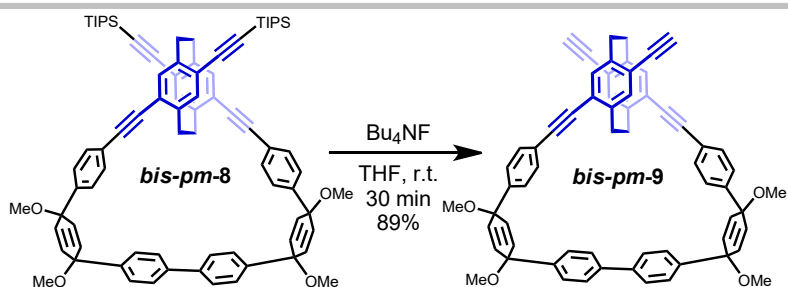

Compound **bis-pm-8** (518.4 mg, 0.43 mmol) was dissolved in THF (30 mL), followed by the addition of Bu<sub>4</sub>NF (1.0 M THF solution, 4.3 mL). The reaction was carried out at room temperature for 30 min. H<sub>2</sub>O was added to the reaction mixture. The organic layer was extracted three times with EA and washed with brine, and dried over Na<sub>2</sub>SO<sub>4</sub>. Na<sub>2</sub>SO<sub>4</sub> was removed by filtration. The solvent was evaporated under reduce pressure to give a crude product. The solvent was evaporated under reduce pressure to give a crude product, and then was purified by column chromatography on silica gel (PE/ EA, 5/1, v/v) to get **bis-pm-9** as a yellow solid (338 mg, 89%).

R<sub>f</sub> = 0.19 (EA/PE = 1/5, v/v). M.p. = 193-194 °C.

<sup>1</sup>H NMR (400 MHz, Chloroform-*d*, 298K) δ = 7.61 (d, *J* = 8.3 Hz, 4H), 7.49 (m, 8H), 7.40 (d, *J* = 8.3 Hz, 4H), 7.04 (s, 2H), 6.95 (s, 2H), 6.25 (m, 2H), 6.22 – 6.17 (m, 2H), 6.15 – 6.08 (m, 4H), 3.46 (m, 16H), 3.41 (s, 2H), 3.10 – 2.98 (m, 4H). <sup>13</sup>C NMR (150 MHz, Chloroform-*d*, 298K) δ = 143.8, 143.7, 143.0, 142.5, 139.7, 135.3, 134.2, 134.0, 133.4, 133.1, 132.0, 131.3, 127.0, 126.9, 126.5, 125.5, 123.7, 122.6, 96.6, 90.6, 83.1, 82.7, 75.5, 74.9, 68.6, 52.2, 52.1, 33.0, 32.3, 27.8, 22.2. HRMS (MALDI-TOF) calculated for C<sub>64</sub>H<sub>50</sub>O<sub>4</sub> [M]<sup>+</sup>: 882.3709, found 882.3701.

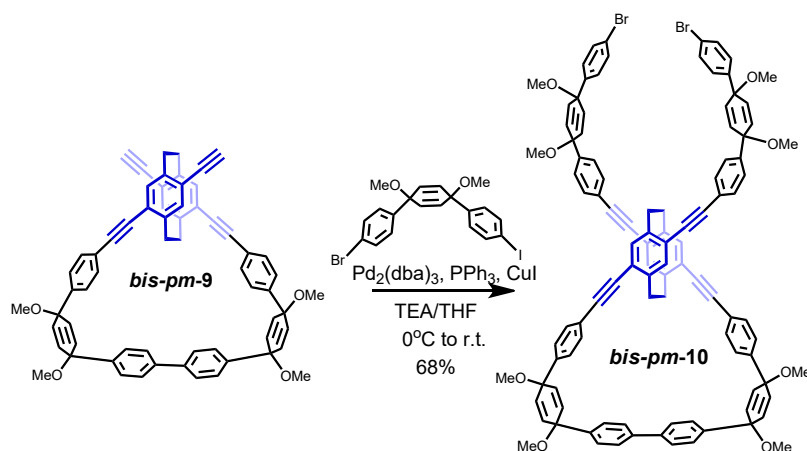

Compound **bis-pm-9** (338 mg, 0.38 mmol), compound **1** (476 mg, 0.96 mmol), Pd<sub>2</sub>(dba)<sub>3</sub> (35.1 mg, 0.038 mmol), PPh<sub>3</sub> (40.3 mg, 0.15 mmol), CuI (14.6 mg, 0.08 mmol) were added to a dried flask. The flask was evacuated and backfilled with Ar three times. After cooling to 0°C, the dried THF (16 mL) and TEA (4 mL) was added to the reaction. The mixture was stirred for 3 h on room temperature. The reaction was quenched with water and extracted with ethyl acetate three times. The combined organic layer was washed with brine, dried with sodium sulfate, and evaporated under reduce pressure. The crude product was purified by column chromatography on silica gel (EA/PE, 1/5, v/v) to get a yellow solid **bis-pm-10** (419.1 mg, 68%).

R<sub>f</sub> = 0.21 (EA/PE = 1/2, v/v). M.p. = 165-166 °C.

<sup>1</sup>H NMR (400 MHz, Chloroform-*d*, 298K) δ = 7.62 (d, *J* = 8.1 Hz, 4H), 7.55 (d, *J* = 7.9 Hz, 4H), 7.53-7.45 (m, 12H), 7.41 (t, *J* = 8.1 Hz, 8H), 7.30 (d, *J* = 8.6 Hz, 4H), 7.06 (s, 2H), 6.98 (s, 2H), 6.25 (m, 2H), 6.22-6.14 (m, 3H), 6.14 – 6.08 (m, 11H), 3.59-3.51 (m, 4H), 3.49 (d, *J* = 0.7 Hz, 6H), 3.47 – 3.44 (m, 12H), 3.43 (s, 6H), 3.15-3.00 (m, 4H). <sup>13</sup>C NMR (150 MHz, Chloroform-*d*, 298K) δ = 143.9, 143.6, 143.5, 142.6, 142.5, 142.4, 134.8, 134.3, 134.0, 133.6, 133.5, 133.5, 133.4, 133.4, 133.1, 132.3, 131.7, 131.34, 128.0, 127.0, 127.0, 126.5, 126.3, 125.0, 124.8, 123.0, 122.9, 121.9, 96.5,

## SUPPORTING INFORMATION

94.5, 91.1, 89.6, 75.6, 75.0, 74.8, 74.6, 52.3, 52.2, 52.1, 33.1, 33.0. HRMS (MALDI-TOF) calculated for  $C_{104}H_{84}Br_2O_8$   $[M]^+$ : 1621.4546, found 1621.4411.

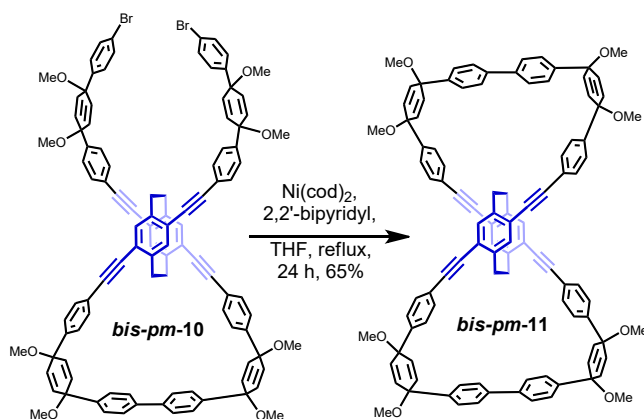

In a nitrogen-filled glove bag, *bis-pm-10* (419.1 mg, 0.26 mmol),  $\text{Ni(cod)}_2$  (177.6 mg, 0.65 mmol), 2,2'-bipyridyl (101.0 mg, 0.65 mmol) were added to a 500 mL two-necked flask containing a magnetic stirring bar and equipped with a condenser. The flask was sealed with a septum and transferred out of glove bag. After dry THF (260 mL) was added to the flask via syringe through a septum, the mixture was refluxed for 24 h. The reaction mixture was cooled down to room temperature and filtered through a short pad of silica gel with ethyl acetate/ $\text{CHCl}_3$ . The solvent was evaporated under reduce pressure to give a crude product, and then was purified by column chromatography on silica gel (PE/ EA, 5/1, v/v) to get *bis-pm-11* as a white solid (247.0 mg, 65%).

$R_f = 0.20$  (EA/PE = 1/2, v/v). M.p. = 240-241 °C.

$^1\text{H NMR}$  (400 MHz, Chloroform-*d*, 298K)  $\delta = 7.63$  (d,  $J = 8.4$  Hz, 8H), 7.52 (d,  $J = 8.9$  Hz, 16H), 7.41 (d,  $J = 8.3$  Hz, 8H), 6.96 (s, 4H), 6.26 (m, 4H), 6.21 (m, 4H), 6.13 (m, 8H), 3.51 (s, 12H), 3.48 (s, 12H), 3.51 – 3.42 (m, 4H), 3.16 – 3.04 (m, 4H).  $^{13}\text{C NMR}$  (100 MHz, Chloroform-*d*, 298K)  $\delta = 144.0, 143.5, 142.5, 139.0, 134.2, 134.0, 133.4, 133.1, 132.4, 131.4, 127.0, 126.9, 126.4, 124.7, 122.9, 96.4, 91.0, 75.5, 75.0, 52.3, 52.2, 33.2, 29.8$ . HRMS (MALDI-TOF) calculated for  $C_{104}H_{84}O_8$   $[M]^+$ : 1460.6166, found 1460.6153.

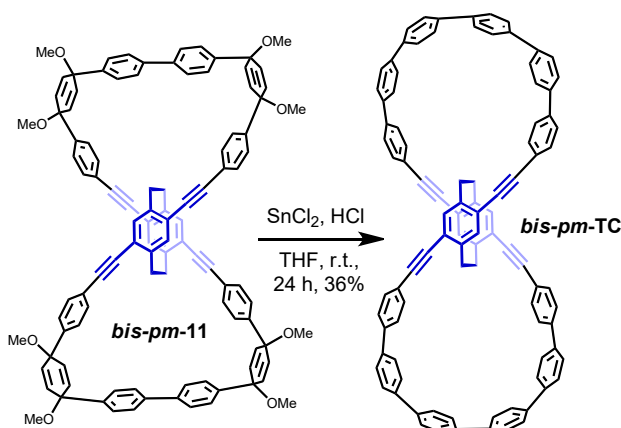

A  $\text{H}_2\text{SnCl}_4/\text{THF}$  solution was freshly prepared by dissolving anhydrous  $\text{SnCl}_2$  (409 mg, 2.15 mmol) in 9 ml anhydrous THF under nitrogen atmosphere and then adding concentrated HCl (aq) (0.32 ml) to the solution. The resulting solution was deoxygenated and stirred for 15 minutes before use. *Bis-pm-11* (63 mg, 0.043 mmol) was dissolved in anhydrous THF (8 ml) and toluene (8 ml) under a nitrogen atmosphere and the freshly prepared  $\text{H}_2\text{SnCl}_4/\text{THF}$  solution (9.3 ml) was added to this solution. The reaction mixture was stirred at room temperature. The reaction mixture was stirred at room



## SUPPORTING INFORMATION

---

temperature for 17 h before being quenched with NaOH/H<sub>2</sub>O solution. The aqueous layer was extracted with dichloromethane and the organic layers were combined and dried with anhydrous Na<sub>2</sub>SO<sub>4</sub>. The crude mixture was purified by column chromatography (SiO<sub>2</sub>, DCM/ petroleum ether, 1/10) to get **bis-*pm*-TC** as a light yellow solid (18.8 mg, 36%).

R<sub>f</sub> = 0.20 (DCM/PE = 1/2, v/v). M.p. > 300 °C.

<sup>1</sup>H NMR (400 MHz, Chloroform-*d*, 298K) δ = 7.57-7.53 (m, 22H), 7.49 (d, *J* = 8.7 Hz, 10H), 7.43 (s, 16H), 6.84 (s, 4H), 2.90-2.76 (m, 4H), 2.69-2.56 (m, 4H). <sup>13</sup>C NMR (100 MHz, Chloroform-*d*, 298K) δ = 144.83, 140.58, 138.9, 138.2, 137.8, 137.3, 131.5, 131.5, 127.7, 127.6, 127.2, 121.9, 96.5, 93.0, 31.51, 30.3. HRMS (MALDI-TOF) calculated for C<sub>96</sub>H<sub>60</sub> [M]<sup>+</sup>: 1213.4729, found 1213.4731.

## 2. Results and Discussion

### 2.1 Planar chiral 4,7,12,15-tetrasubstituted [2.2]PCP

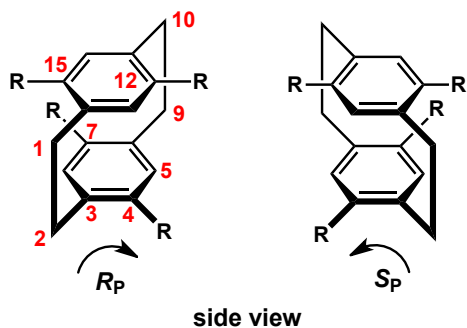

Fig. S1  $R_p$ - and  $S_p$ - describe the planar chirality of 4,7,12,15-tetrasubstituted [2.2]PCP.

### 2.2 Topological transformation

#### 2.2.1 semi-macrocycles PCP-[n]CPP

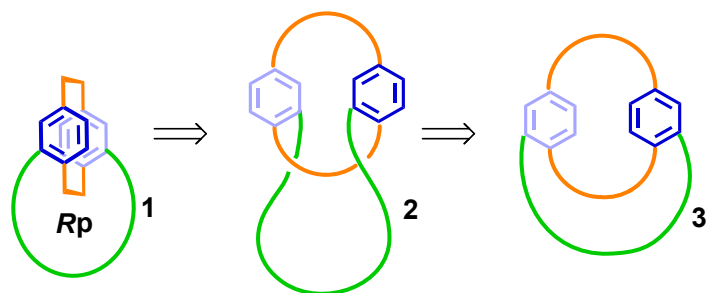

Fig. S2 Topological transformation of semi-macrocycles including *bis-pm-8*, *bis-pm-10* and PCP-[n]CPP to be planar molecular graph, which demonstrates it is topologically achiral.

#### 2.2.2 $R_p$ -bis-*pm*-TC

# SUPPORTING INFORMATION

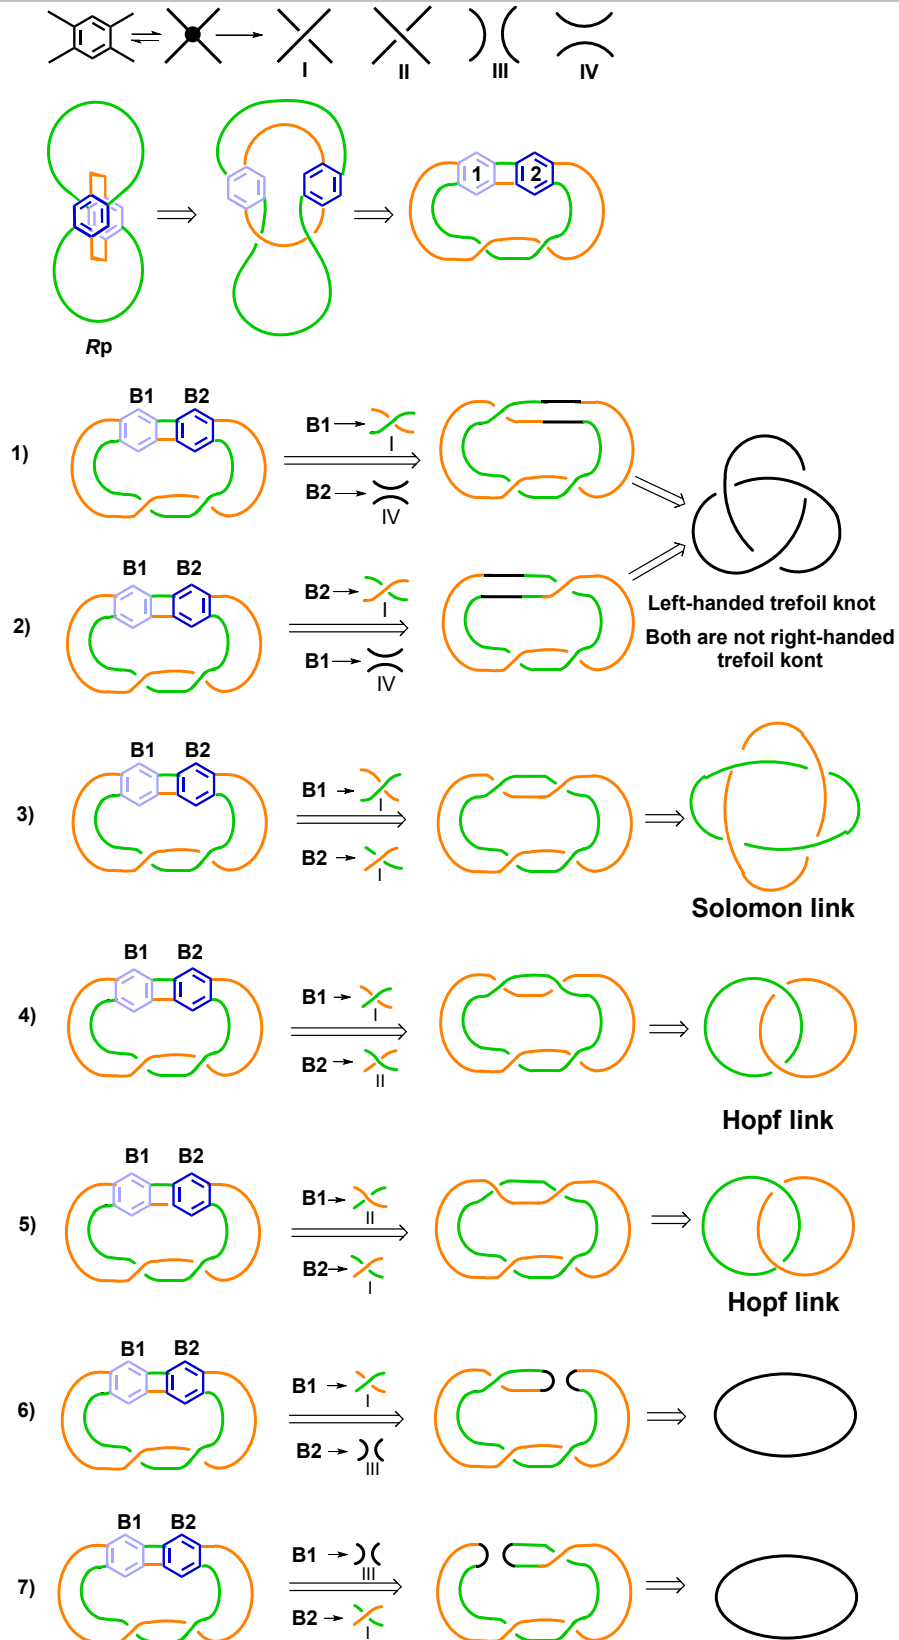

# SUPPORTING INFORMATION

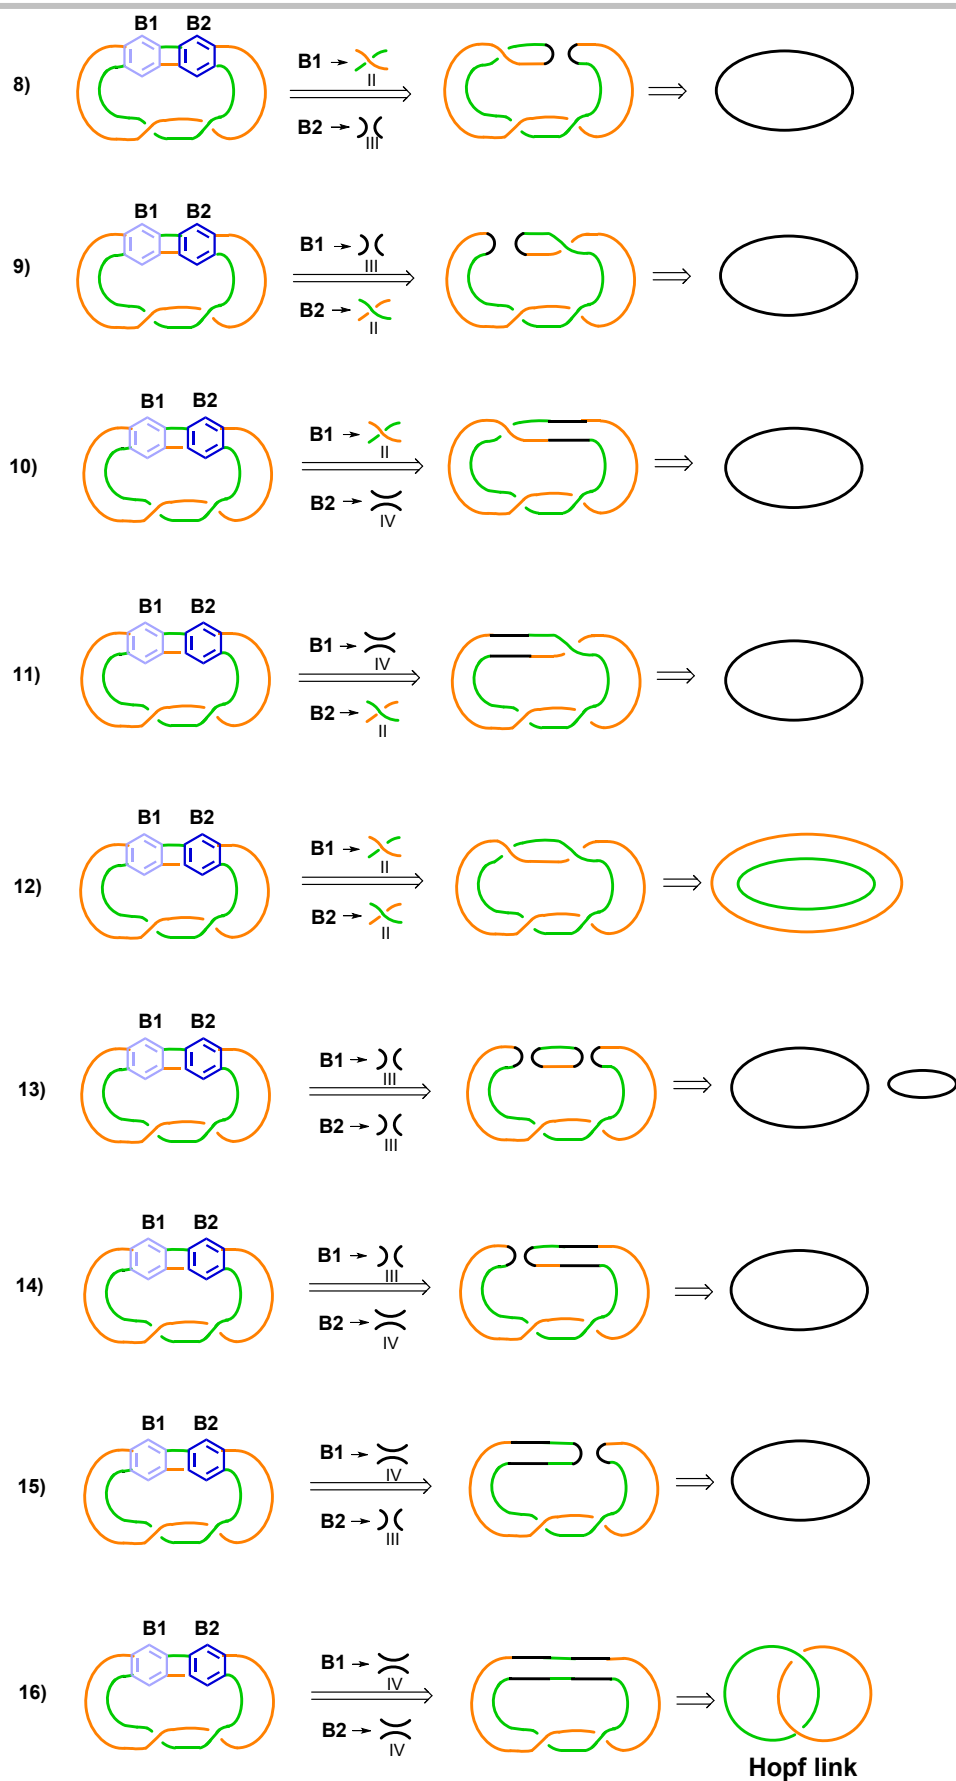

Fig. S3 Topological transformation of *Rp-bis-pm-TC* into all topological trivial and nontrivial species.

# SUPPORTING INFORMATION

**Table S1.** All topological trival and nontrival species of *Rp-bis-pm-TC*.

| B1<br>B2 | I                                                                                 | II                                                                                | III                                                                               | IV                                                                                  |
|----------|-----------------------------------------------------------------------------------|-----------------------------------------------------------------------------------|-----------------------------------------------------------------------------------|-------------------------------------------------------------------------------------|
| I        |  |  |  |  |
| II       |  |  |  |  |
| III      |  |  |  |  |
| IV       |  |  |  |  |

## 2.2.3 *Sp-bis-pm-TC*

Topological transformation of *Sp-bis-pm-TC* taking the transformation to be right-handed trefoil knot as an example.

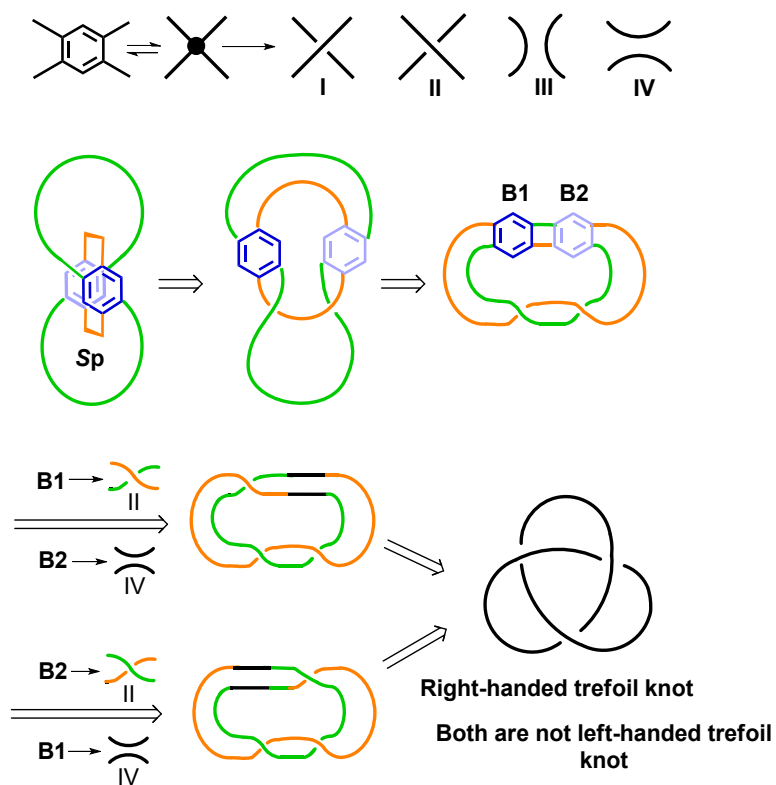

**Fig. S4** Topological transformation of *Sp-bis-pm-TC* by taking the transformation to a trefoil knot subgraph as an example.

# SUPPORTING INFORMATION

**Table S2.** All topological trival and nontrival species of *Sp-bis-pm-TC*.

| B1 \ B2 | I | II | III | IV |
|---------|---|----|-----|----|
| I       |   |    |     |    |
| II      |   |    |     |    |
| III     |   |    |     |    |
| IV      |   |    |     |    |

## 2.2.4 bis-po-CC

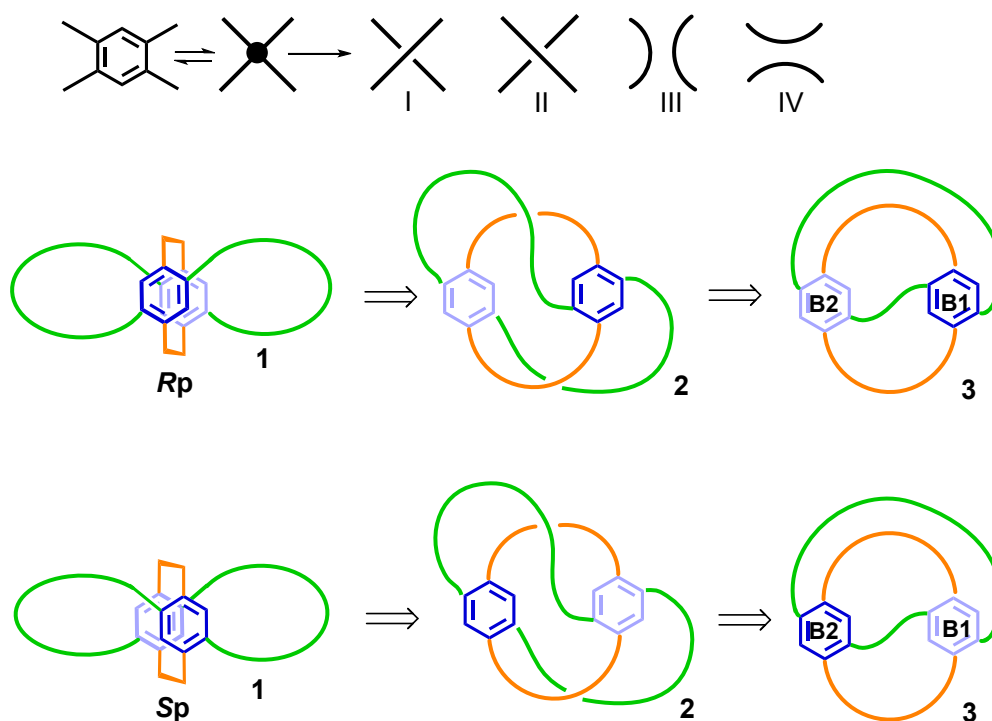

**Fig. S5** Topological deformation of *bis-po-CC*.

**Table S3.** All topological trival and nontrival species of *Sp-bis-po-CC*.

| B1 \ B2 | I | II | III | IV |
|---------|---|----|-----|----|
| I       |   |    |     |    |
| II      |   |    |     |    |
| III     |   |    |     |    |
| IV      |   |    |     |    |

## SUPPORTING INFORMATION

### 2.3 Comparison of the $^1\text{H}$ NMR spectra

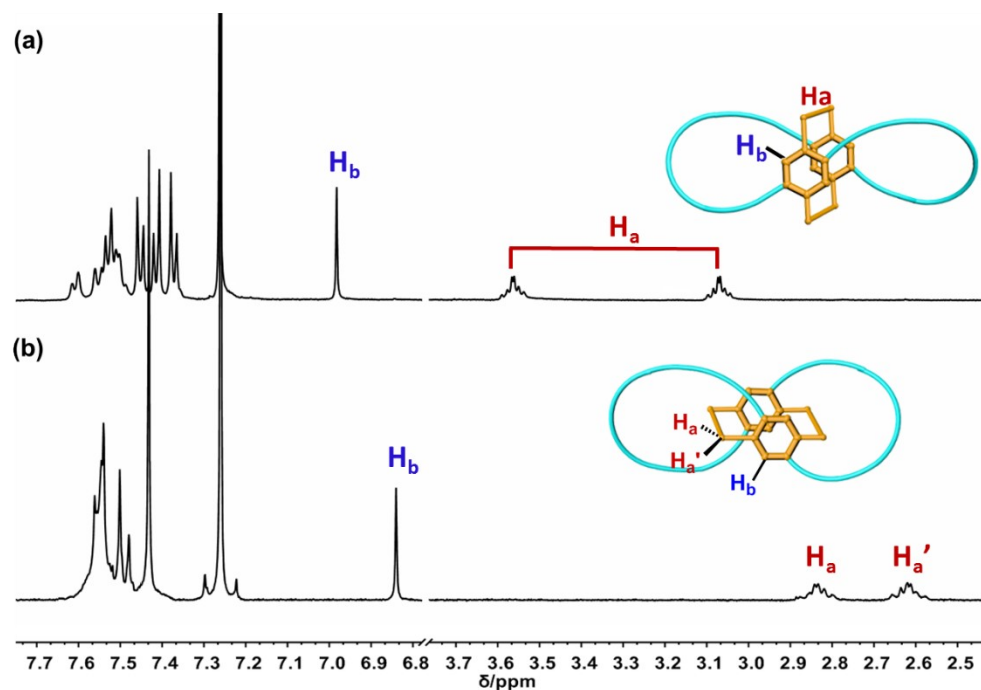

Fig. S6 Comparison of the  $^1\text{H}$  NMR spectra (600 MHz,  $\text{CDCl}_3$ , 298 K) of (a) *bis-po-CC* and (b) *bis-pm-TC*.

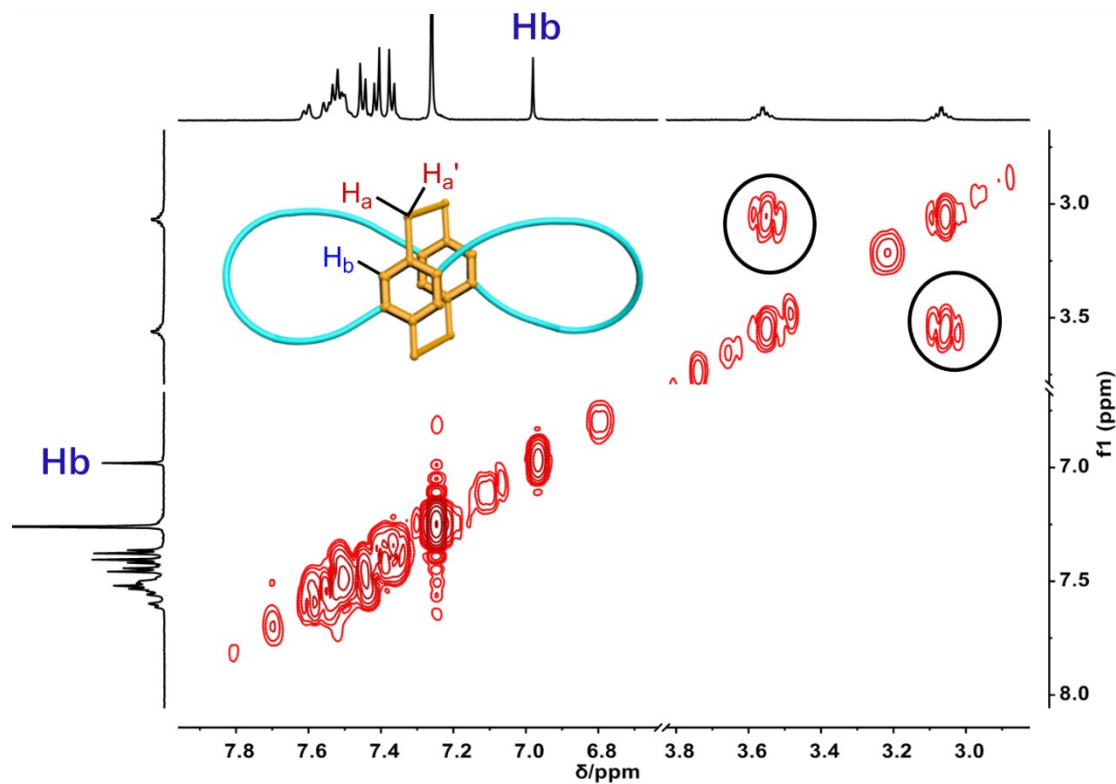

Fig. S7  $^1\text{H}$ - $^1\text{H}$  COSY spectra of *bis-po-CC* (600 MHz,  $\text{CDCl}_3$ , 298 K).

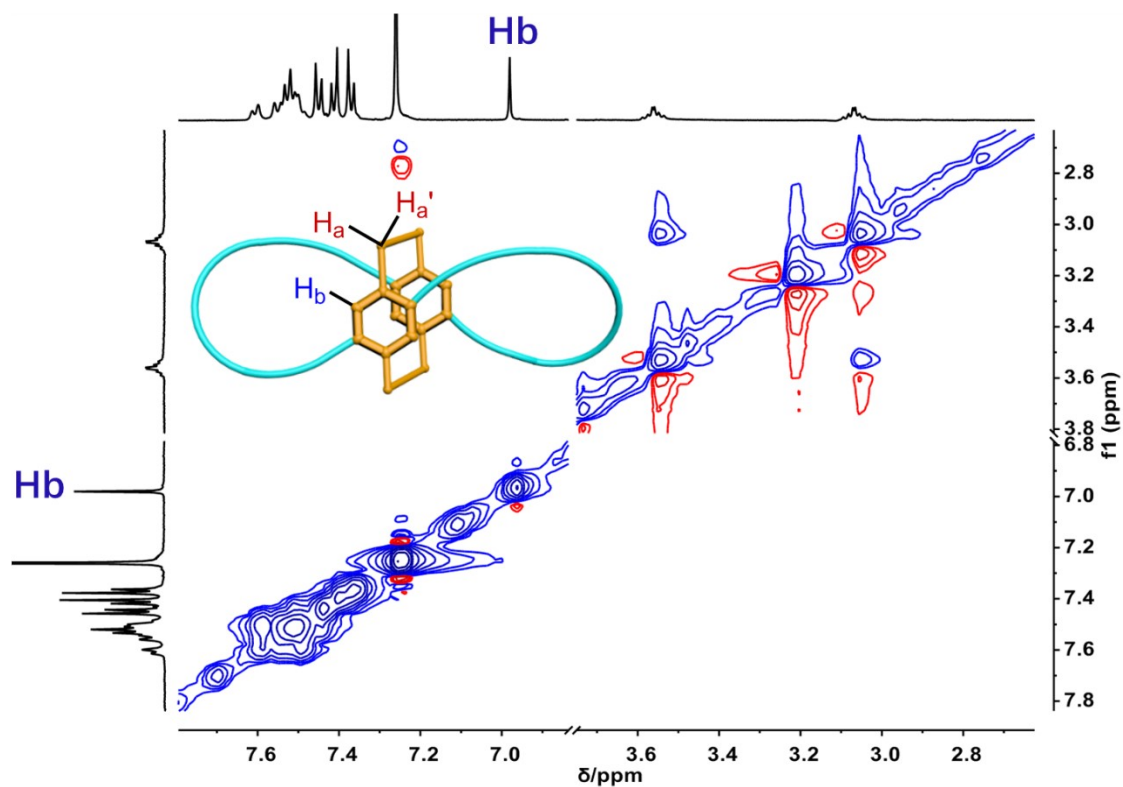

Fig. S8 NOESY spectra of *bis-po-CC* (600 MHz,  $\text{CDCl}_3$ , 298 K).

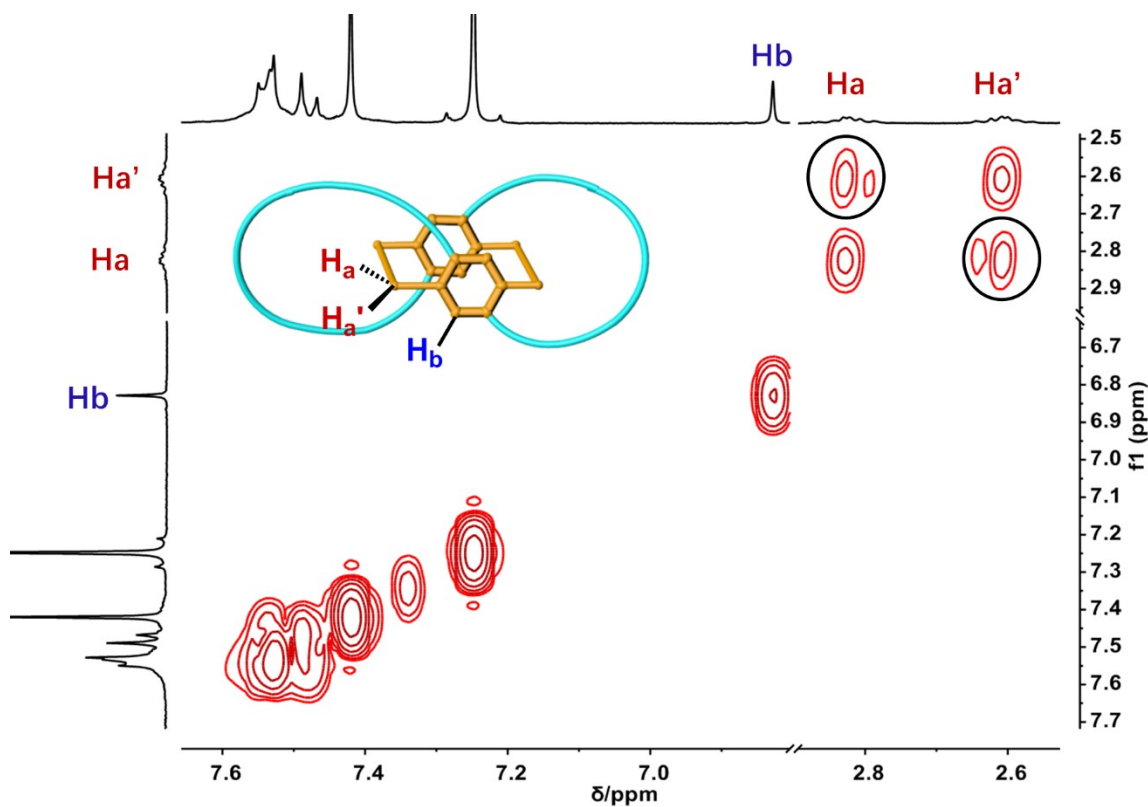

Fig. S9  $^1\text{H}$ - $^1\text{H}$  COSY spectra of *bis-pm-TC* (600 MHz,  $\text{CDCl}_3$ , 298 K).



# SUPPORTING INFORMATION

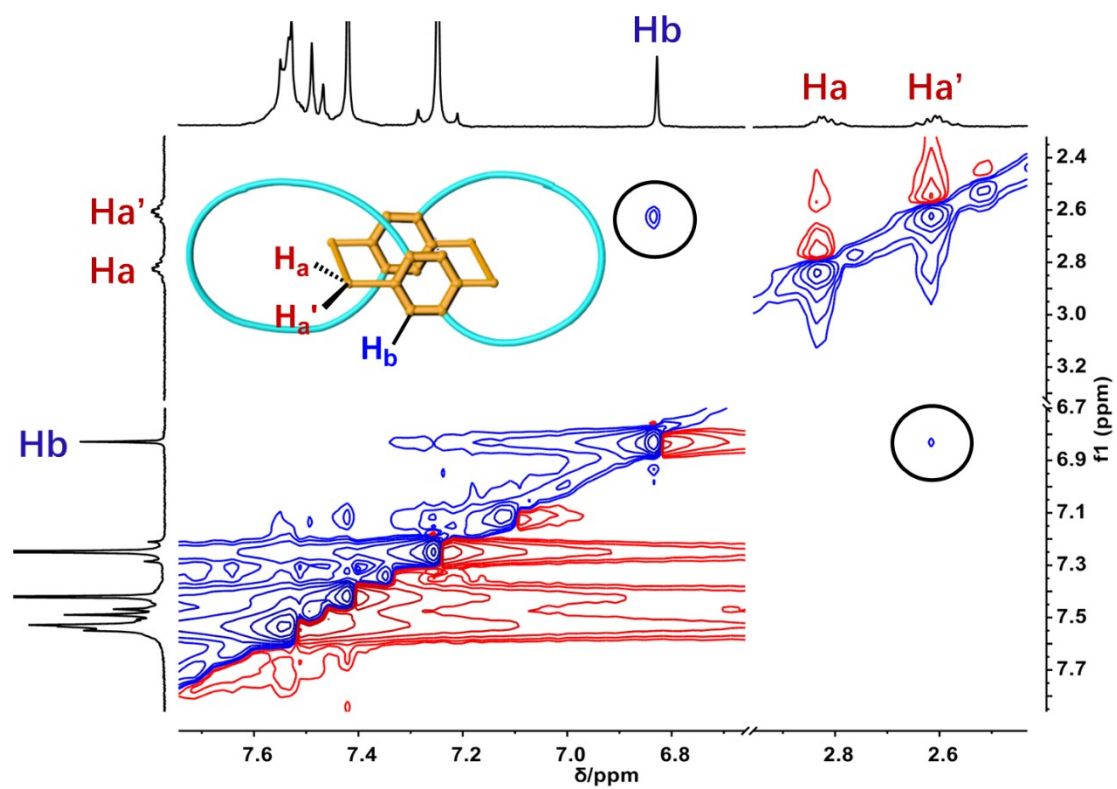

Fig. S10 NOESY spectra of *bis-pm-TC* (600 MHz, CDCl<sub>3</sub>, 298 K).

## 2.4 X-ray Crystallography

Crystals suitable for X-ray analysis were obtained by vapor diffusion of hexane into chloroform solution of **bis-pm-11** and **bis-pm-TC**, respectively. Single crystal X-ray diffraction data were collected on a Rigaku Super Nova, Dual, Cu at zero, AtlasS2 diffractometer. The crystal was kept at 100.00(10) K during data collection. Using Olex2<sup>S4</sup>, the structure was solved with the ShelXT<sup>S5</sup> structure solution program using Direct Methods and refined with the ShelXL<sup>S6</sup> refinement package using Least Squares minimization. The disordered solvent molecules were removed with the SQUEEZE routine in PLATON<sup>S7</sup> and the solvent-free model was employed for the final refinement. All non-hydrogen atoms were refined anisotropically. All hydrogen atoms were positioned by geometric idealization. Details of the crystal data and a summary of the intensity data collection parameters are listed in Table S4-S5. Crystallographic data were deposited at the Cambridge Crystallographic Data Center (CCDC 2173517 for **bis-pm-11**, 2173519 for **bis-pm-TC**). The data can be obtained free of charge from The Cambridge Crystallographic Data Centre via [www.ccdc.cam.ac.uk/structures](http://www.ccdc.cam.ac.uk/structures).

Crystal Structure Data of compound **bis-pm-11** (CCDC number: 2173517).

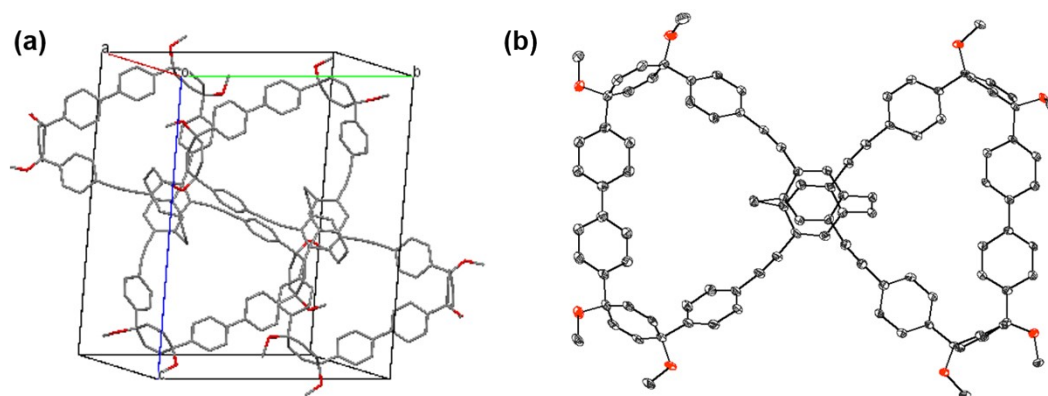

**Fig. S11** Crystal structure of **bis-pm-11** was obtained by slow diffusion of hexane into chloroform solution. (a) Crystal cell (b) ORTEP drawing. Hydrogen atoms are omitted for clarity. Thermal ellipsoids are drawn at the 50% probability level.

**Table S4.** Crystal data and structure refinement for compound **bis-pm-11**.

|                       | <b>bis-pm-11</b>                                |
|-----------------------|-------------------------------------------------|
| CCDC                  | 2173517                                         |
| Empirical formula     | C <sub>104</sub> H <sub>84</sub> O <sub>8</sub> |
| Formula weight        | 1461.71                                         |
| Temperature/K         | 99.99(10)                                       |
| Crystal system        | triclinic                                       |
| Space group           | P-1                                             |
| a/Å                   | 13.7107(2)                                      |
| b/Å                   | 16.2983(3)                                      |
| c/Å                   | 21.2715(3)                                      |
| $\alpha$ /°           | 94.4940(10)                                     |
| $\beta$ /°            | 95.4560(10)                                     |
| $\gamma$ /°           | 112.361(2)                                      |
| Volume/Å <sup>3</sup> | 4342.01(13)                                     |

## SUPPORTING INFORMATION

|                                                |                                                                |
|------------------------------------------------|----------------------------------------------------------------|
| Z                                              | 2                                                              |
| $\rho_{\text{calc}}/\text{cm}^3$               | 1.118                                                          |
| $\mu/\text{mm}^{-1}$                           | 0.545                                                          |
| F(000)                                         | 1544.0                                                         |
| Crystal size/ $\text{mm}^3$                    | $0.2 \times 0.05 \times 0.02$                                  |
| Radiation                                      | CuK $\alpha$ ( $\lambda = 1.54184$ )                           |
| 2 $\theta$ range for data collection/ $^\circ$ | 6.816 to 152.694                                               |
| Index ranges                                   | $-17 \leq h \leq 17, -20 \leq k \leq 20, -26 \leq l \leq 26$   |
| Reflections collected                          | 55712                                                          |
| Independent reflections                        | 17529 [ $R_{\text{int}} = 0.0823, R_{\text{sigma}} = 0.0622$ ] |
| Data/restraints/parameters                     | 17529/0/1017                                                   |
| Goodness-of-fit on $F^2$                       | 1.104                                                          |
| Final R indexes [ $I \geq 2\sigma(I)$ ]        | $R_1 = 0.0913, wR_2 = 0.2200$                                  |
| Final R indexes [all data]                     | $R_1 = 0.1037, wR_2 = 0.2275$                                  |
| Largest diff. peak/hole / $e \text{ \AA}^{-3}$ | 0.66/-0.41                                                     |

Crystal Structure Data of compound *bis-pm-TC* (CCDC number: **2173519**).

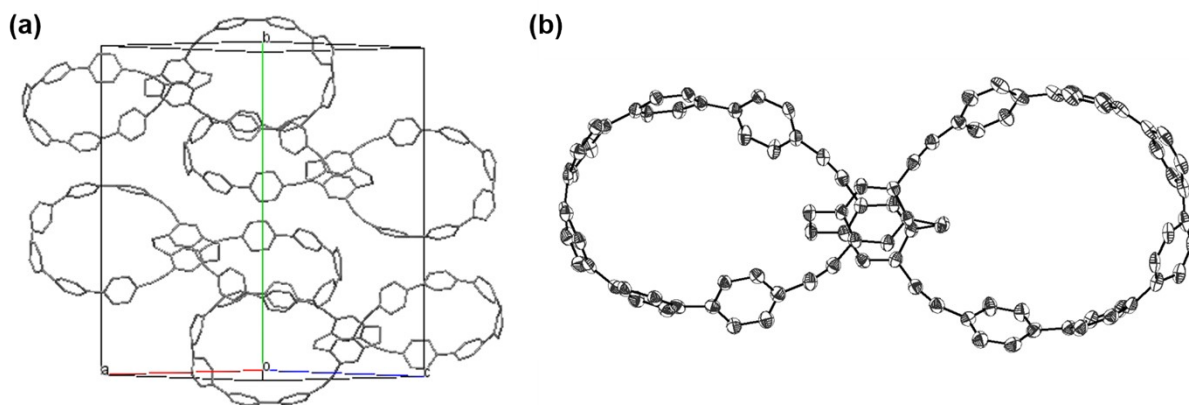

**Fig. S12** Crystal structure of *bis-pm-TC* was obtained by slow diffusion of hexane into chloroform solution. (a) Crystal cell (b) ORTEP drawing. Hydrogen atoms are omitted for clarity. Thermal ellipsoids are drawn at the 50% probability level.

**Table S5.** Crystal data and structure refinement for compound *bis-pm-TC*.

|                   | <i>bis-pm-TC</i>             |
|-------------------|------------------------------|
| CCDC              | 2173519                      |
| Empirical formula | $\text{C}_{99}\text{H}_{60}$ |
| Formula weight    | 1249.47                      |
| Temperature/K     | 100.00(10)                   |
| Crystal system    | monoclinic                   |
| Space group       | $P2_1/n$                     |
| a/ $\text{\AA}$   | 15.8108(10)                  |
| b/ $\text{\AA}$   | 27.4612(19)                  |

## SUPPORTING INFORMATION

---

|                                               |                                                                |
|-----------------------------------------------|----------------------------------------------------------------|
| $c/\text{\AA}$                                | 18.3586(11)                                                    |
| $\alpha/^\circ$                               | 90                                                             |
| $\beta/^\circ$                                | 104.885(7)                                                     |
| $\gamma/^\circ$                               | 90                                                             |
| Volume/ $\text{\AA}^3$                        | 7703.5(9)                                                      |
| Z                                             | 4                                                              |
| $\rho_{\text{calc}}/\text{g/cm}^3$            | 1.077                                                          |
| $\mu/\text{mm}^{-1}$                          | 0.464                                                          |
| F(000)                                        | 2616.0                                                         |
| Crystal size/ $\text{mm}^3$                   | $0.1 \times 0.1 \times 0.1$                                    |
| Radiation                                     | Cu $K\alpha$ ( $\lambda = 1.54184$ )                           |
| $2\Theta$ range for data collection/ $^\circ$ | 6.438 to 154.418                                               |
| Index ranges                                  | $-20 \leq h \leq 19, -21 \leq k \leq 34, -21 \leq l \leq 23$   |
| Reflections collected                         | 55423                                                          |
| Independent reflections                       | 15468 [ $R_{\text{int}} = 0.1441, R_{\text{sigma}} = 0.1322$ ] |
| Data/restraints/parameters                    | 15468/0/865                                                    |
| Goodness-of-fit on $F^2$                      | 0.925                                                          |
| Final R indexes [ $I \geq 2\sigma(I)$ ]       | $R_1 = 0.0874, wR_2 = 0.2233$                                  |
| Final R indexes [all data]                    | $R_1 = 0.1494, wR_2 = 0.2625$                                  |
| Largest diff. peak/hole / $e \text{\AA}^{-3}$ | 0.63/-0.26                                                     |

---

## SUPPORTING INFORMATION

### 2.5 Details of HPLC Experiments

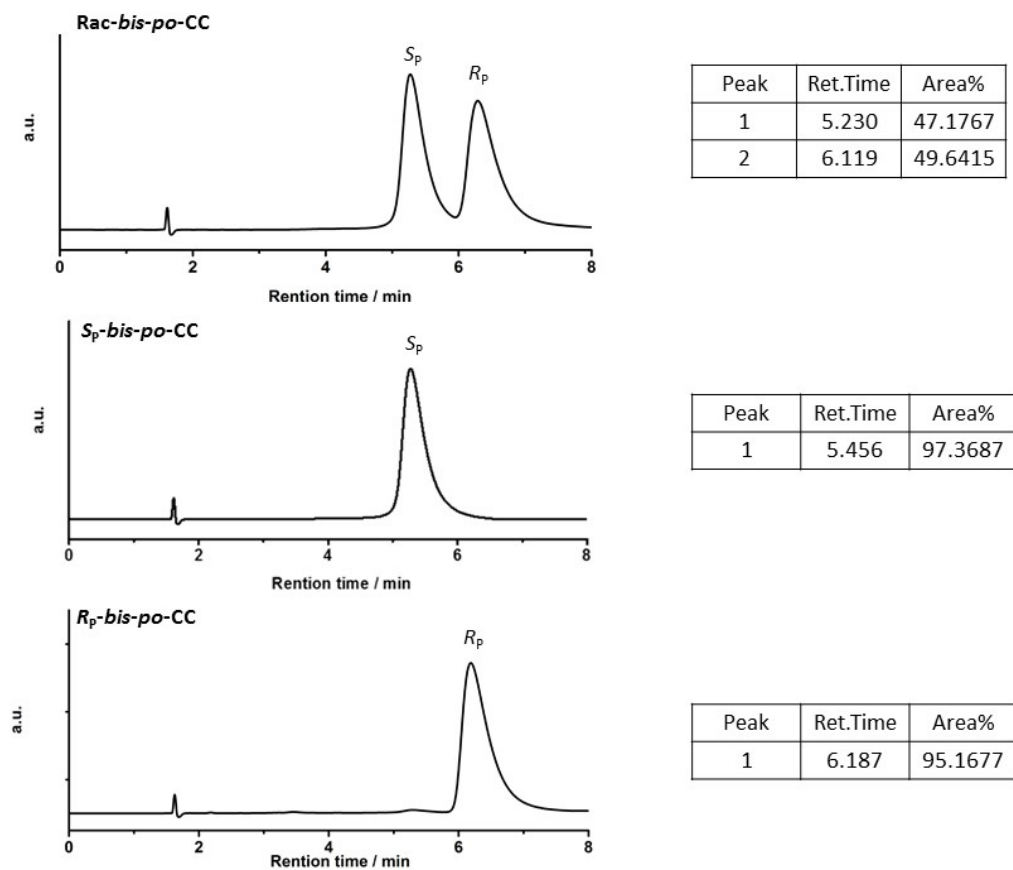

Fig. S13 HPLC charts of the enantiomers of *bis-po-CC*.

Resolution of racemic *bis-po-CC* by HPLC. *Bis-po-CC* (10 mg) was subjected to high-pressure liquid chromatography (HPLC) (Chiralpak IB column, 4.6 mm  $\Phi$   $\times$  250 mmL) equipped with a UV-vis detector.

Single injection volume: 10  $\mu$ L. Sample concentration: 1 mg/mL. Chromatography condition: DCM/Hexane (v/v, 28:72) with a flow rate of 2.0 mL/min.

**Peak 1:**

Assigned as *R<sub>p</sub>*-*bis-po-CC*, retention time: 5.2 min, isolated total: 4.7 mg, 47%

**Peak 2:**

Assigned as *S<sub>p</sub>*-*bis-po-CC*, retention time: 6.1 min, isolated total: 4.9 mg, 49%

## SUPPORTING INFORMATION

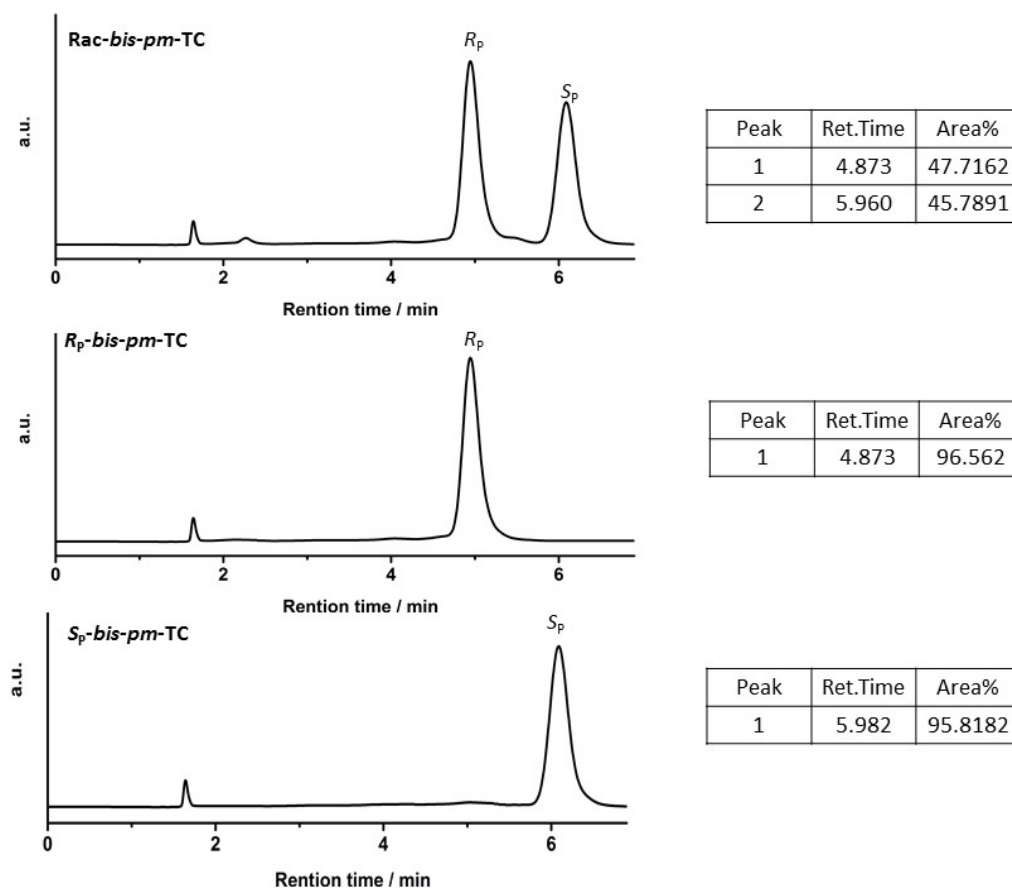

Fig. S14 HPLC charts of the enantiomers of *bis-pm-TC*.

Resolution of racemic compound *bis-pm-TC* by HPLC. *Bis-pm-TC* (10 mg) was subjected to high-pressure liquid chromatography (HPLC) (Chiralpak IB column, 4.6 mm  $\Phi$   $\times$  250 mmL) equipped with a UV-vis detector.

Single injection volume: 10  $\mu$ L. Sample concentration: 1 mg/mL. Chromatography condition: DCM/MeOH (v/v, 42:58) with a flow rate of 2.0 mL/min.

**Peak 1:**

Assigned as *R<sub>P</sub>*-*bis-pm-TC*, retention time: 4.8 min, isolated total: 4.8 mg, 48%

**Peak 2:**

Assigned as *S<sub>P</sub>*-*bis-pm-TC*, retention time: 5.9 min, isolated total: 4.6 mg, 46%

## 2.6 Photophysical Properties

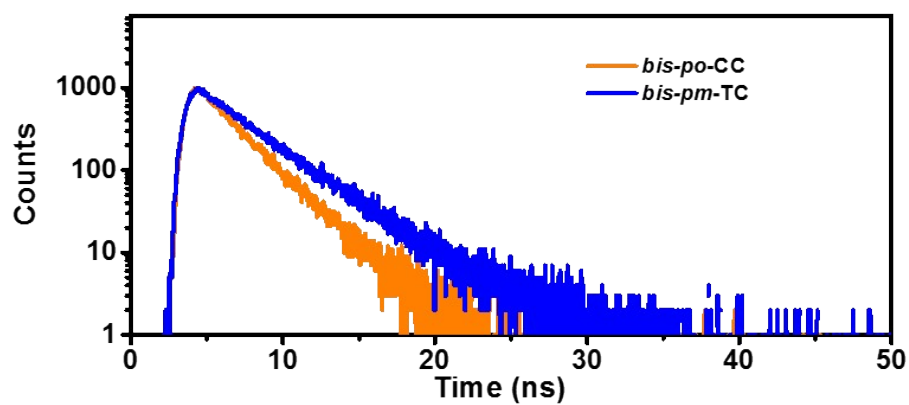

Fig. S15 Emission lifetime of *bis-po-CC* and *bis-pm-TC* in  $\text{CH}_2\text{Cl}_2$  ( $c = 1.0 \times 10^{-5}$  M).

2.7 Comparison of  $|g_{lum}|$  of some CPL-active organic molecules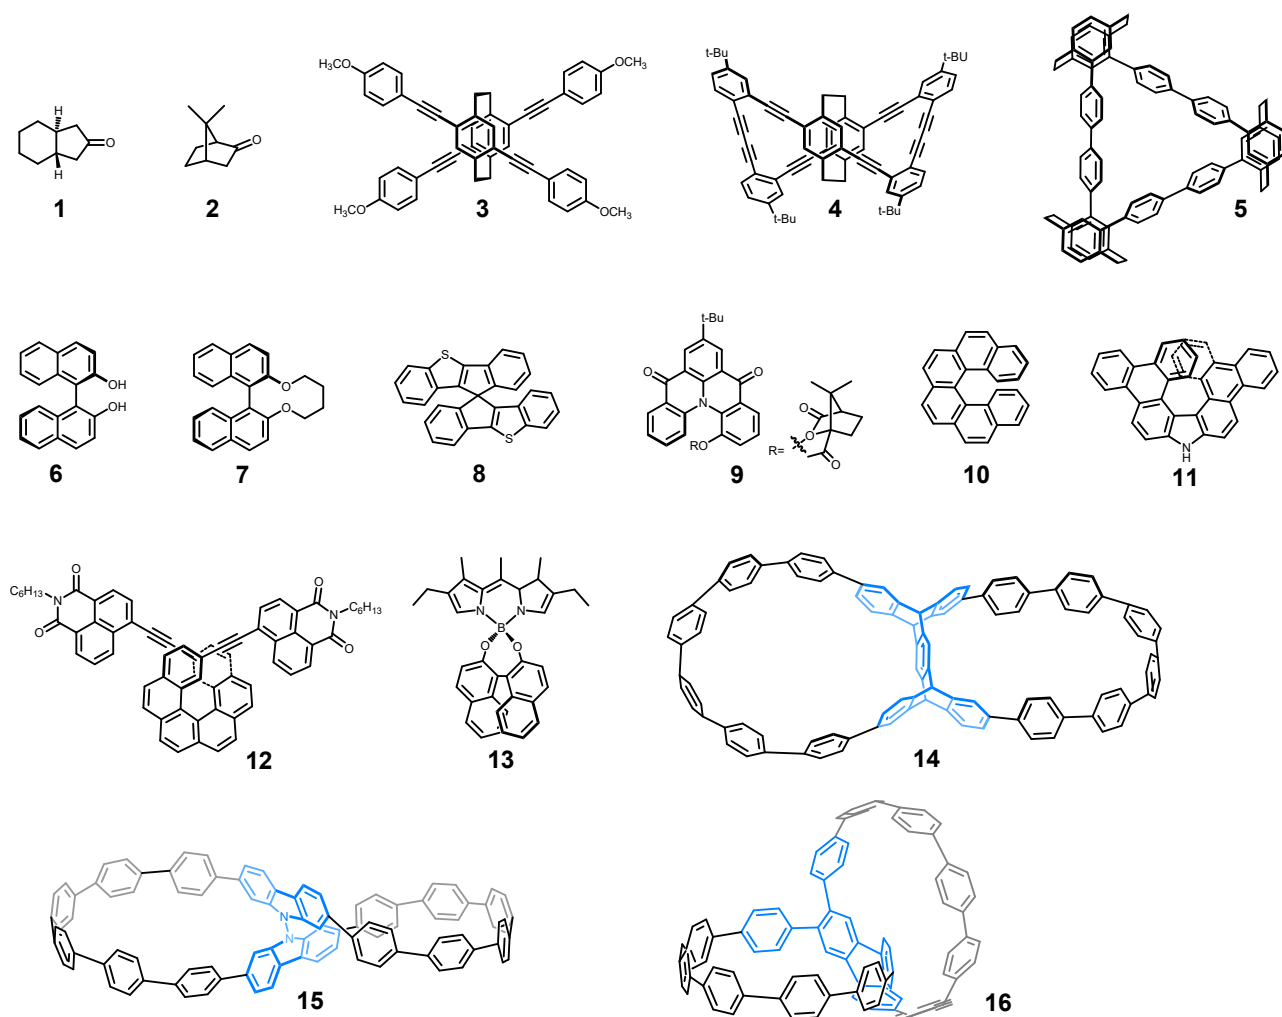

Fig. S16. Representative examples of CPL-active organic molecules.

Table S6. Comparison of the CPL dissymmetry factors of some CPL-active organic molecules.

| Compounds | $g_{lum} \times 10^3$ | Ref.                                           |
|-----------|-----------------------|------------------------------------------------|
| 1         | 35                    | <i>Chem. Phys. Lett.</i> 1967, 1, 129.         |
| 2         | $\approx 2.4$         | <i>J. Am. Chem. Soc.</i> 1976, 98, 2210.       |
| 3         | 1.4                   | <i>Chem. Eur. J.</i> 2016, 22, 2291.           |
| 4         | 11                    | <i>J. Am. Chem. Soc.</i> 2014, 136, 3350.      |
| 5         | 1.6                   | <i>Chem.-Eur. J.</i> 2021, 27, 16225.          |
| 6         | 0.47                  | <i>Chem. Lett.</i> 2015, 44, 1607.             |
| 7         | 1.4                   | <i>Chem. Asian J.</i> 2012, 7, 2836.           |
| 8         | 1.5                   | <i>Org. Lett.</i> 2017, 19, 5082.              |
| 9         | 1.0                   | <i>J. Am. Chem. Soc.</i> 2003, 125, 11808.     |
| 10        | 0.14                  | <i>J. Chem. Theory Comput.</i> 2016, 12, 2799. |
| 11        | 1.9                   | <i>Angew. Chem. Int. Ed.</i> 2020, 59, 7813.   |
| 12        | 3.2                   | <i>Chem. Sci.</i> 2020, 11, 567.               |
| 13        | 0.85                  | <i>J. Am. Chem. Soc.</i> 2014, 136, 3346.      |



## SUPPORTING INFORMATION

|    |     |                                              |
|----|-----|----------------------------------------------|
| 14 | 3.4 | <i>Angew. Chem. Int. Ed.</i> 2019, 58, 3943. |
| 15 | 3.7 | <i>J. Am. Chem. Soc.</i> 2019, 141, 7421.    |
| 16 | 6.5 | <i>Nat. Commun.</i> 2022, 13, 3543.          |
|    | 19  |                                              |

### 2.8 Computational details and results

All theoretical calculations were performed by the density functional theory (DFT)<sup>S8</sup> and time-dependent DFT (TD DFT)<sup>S9</sup> with B3LYP functional in dichloromethane.<sup>S10</sup> The geometries of ground state of **bis-po-CC**, **bis-pm-TC**, **po-PCP-[6]CPP**, and **pm-PCP-[6]CPP** were optimized at the B3LYP/6-31G (d, p) level. The UV-vis curves were calculated at TD PBE0(D3BJ)/6-31G (d, p) level. The ECD curves were predicted at the TD B3LYP/6-311G (d, p) level with a key word of IOP (9/40=4). The conductor-like polarizable continuum model (CPCM) with dielectric constant of 8.93 were employed to consider the effect of the polar solvent dichloromethane. Orbital localization analyses were carried out using Multiwfn3.4. LOL- $\pi$  isosurfaces for the molecules are illustrated at isovalue = 0.30. LOL- $\pi$  isosurfaces for the molecules are illustrated at isovalue = 0.60. All of these calculations were performed by Gaussian09 program package.<sup>S11</sup>

#### 2.8.1 Simulated UV-vis spectra

To investigate the absorption behavior, we employed time-dependent (TD) calculations on **bis-po-CC** and **bis-pm-TC** at TD PBE0(D3BJ)/6-31G (d, p) level in dichloromethane.

TD-DFT calculation results reveal that the  $S_9$  and  $S_{11}$  states make the major contribution to the observed peak ( $\lambda_{\text{abs}} = 334$  nm,  $\lambda_{\text{TD-DFT}} = 328.2$  nm, Fig. S18) in the compound **bis-po-CC** (Table S7), which corresponds to the transitions of HOMO-2  $\rightarrow$  LUMO+2 (Table S9).  $S_3$  state makes the major contribution to the observed peak ( $\lambda_{\text{abs}} = 361$  nm,  $\lambda_{\text{TD-DFT}} = 367$  nm, Fig. S18) in the compound **bis-po-CC** (Table S8), which corresponds to the transitions of HOMO-2  $\rightarrow$  LUMO (Table S9).

TD-DFT calculation results reveal that the  $S_3$  and  $S_6$  states make the major contribution to the observed peak ( $\lambda_{\text{abs}} = 338$  nm,  $\lambda_{\text{TD-DFT}} = 341.2$  nm, Fig. S19) in the compound **bis-pm-TC** (Table S10), which corresponds to the transitions of HOMO  $\rightarrow$  LUMO and HOMO-2  $\rightarrow$  LUMO+1 (Table S11). The simulated UV-vis spectra depicted in Fig. S18 and Fig. S19 matches well with the experimental ones.

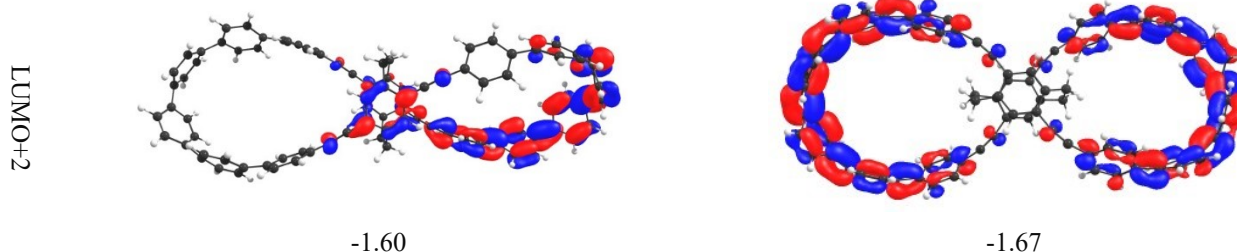

## SUPPORTING INFORMATION

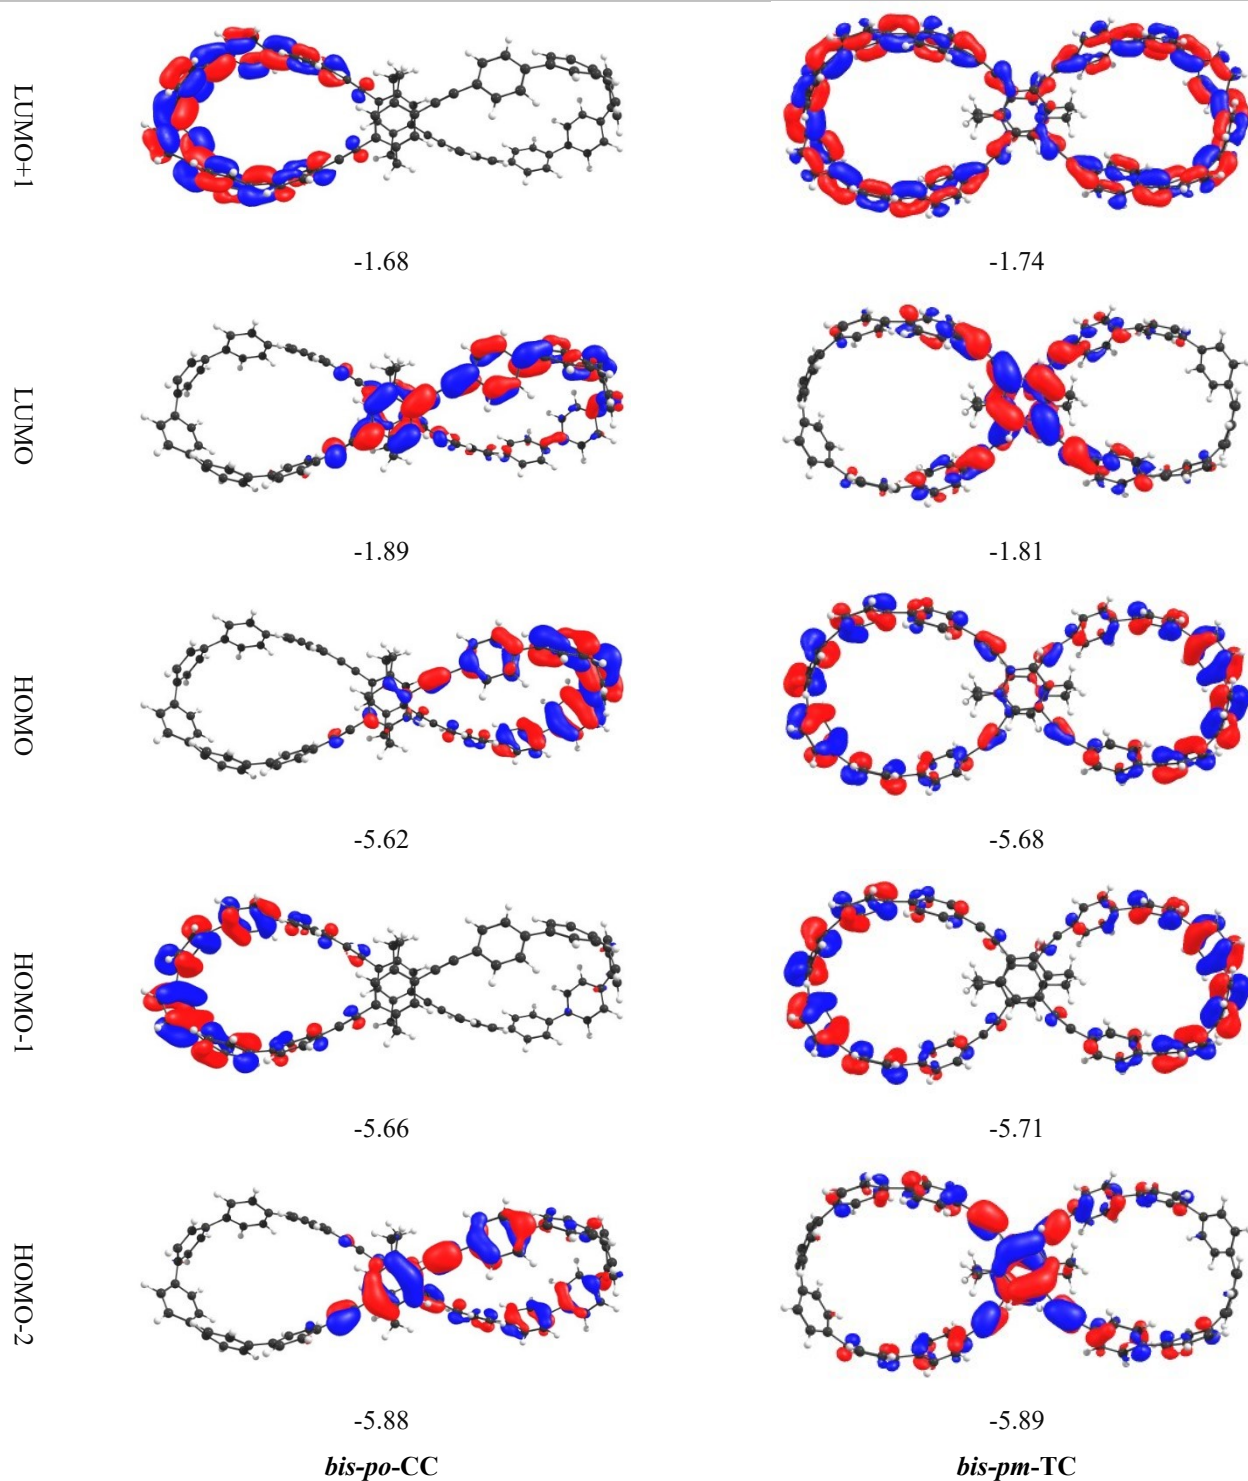

**Fig. S17** The TD B3LYP/6-311+G (d, p) predicted frontier molecular orbital and energies (eV) of *bis-po-CC* and *bis-pm-TC* in dichloromethane.

## SUPPORTING INFORMATION

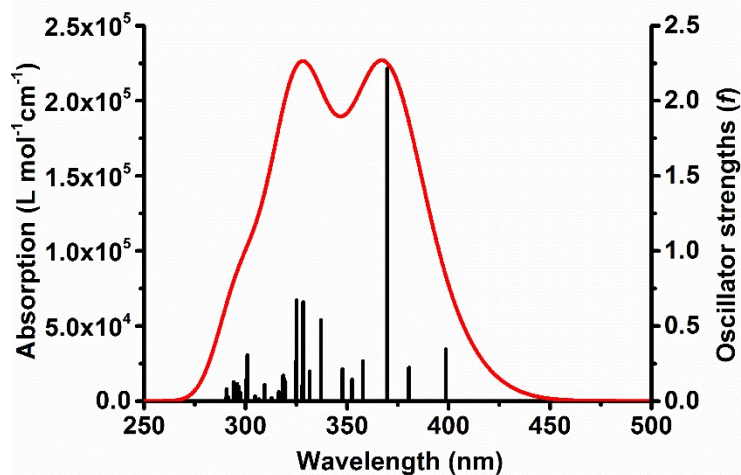

Fig. S18 Simulated UV-vis spectra of *bis-po-CC* in dichloromethane.

**Table S7.** Main contribution of individual transition to the peak of *bis-po-TC* ( $\lambda=328.2$  nm)

| Transition      | Contribution |
|-----------------|--------------|
| S <sub>9</sub>  | 22.4%        |
| S <sub>11</sub> | 22.2%        |
| S <sub>7</sub>  | 14.6%        |

**Table S8.** Main contribution of individual transition to the peak of *bis-po-TC* ( $\lambda=367.0$  nm)

| Transition     | Contribution |
|----------------|--------------|
| S <sub>3</sub> | 74.1%        |

**Table S9.** The TD DFT calculated absorption maxima ( $\lambda_{\max}$ , nm), oscillator strengths ( $f$ ), and major transition in dichloromethane of *bis-po-TC*.

| state          | Energy | $\lambda_{\max}$ | $f$  | Description         |
|----------------|--------|------------------|------|---------------------|
| S <sub>3</sub> | 3.3534 | 370              | 2.22 | HOMO-2→LUMO(0.488)  |
|                |        |                  |      | HOMO-1→LUMO(0.34)   |
|                |        |                  |      | HOMO-1→LUMO+1(0.14) |
|                |        |                  |      | HOMO→LUMO+2(0.30)   |
| S <sub>7</sub> | 3.6769 | 337              | 0.54 | HOMO-3→LUMO(0.17)   |
|                |        |                  |      | HOMO-2→LUMO+1(0.20) |
|                |        |                  |      | HOMO-2→LUMO+3(0.14) |
|                |        |                  |      | HOMO-1→LUMO+1(0.12) |
|                |        |                  |      | HOMO→LUMO+1(0.42)   |
|                |        |                  |      | HOMO→LUMO+3(0.39)   |
|                |        |                  |      | HOMO→LUMO+4(0.12)   |

## SUPPORTING INFORMATION

|                 |        |     |      |                     |
|-----------------|--------|-----|------|---------------------|
| S <sub>9</sub>  | 3.7749 | 328 | 0.66 | HOMO-4→LUMO(0.26)   |
|                 |        |     |      | HOMO-3→LUMO(0.12)   |
|                 |        |     |      | HOMO-3→LUMO+3(0.11) |
|                 |        |     |      | HOMO-2→LUMO+1(0.11) |
|                 |        |     |      | HOMO-2→LUMO+2(0.39) |
|                 |        |     |      | HOMO-2→LUMO+3(0.14) |
|                 |        |     |      | HOMO-1→LUMO+2(0.31) |
|                 |        |     |      | HOMO-1→LUMO+4(0.15) |
|                 |        |     |      | HOMO→LUMO+2(0.15)   |
|                 |        |     |      | HOMO→LUMO+3(0.11)   |
| S <sub>11</sub> | 3.8132 | 325 | 0.67 | HOMO-2→LUMO+1(0.22) |
|                 |        |     |      | HOMO-2→LUMO+2(0.37) |
|                 |        |     |      | HOMO-2→LUMO+3(0.24) |
|                 |        |     |      | HOMO-1→LUMO+4(0.36) |
|                 |        |     |      | HOMO→LUMO+1(0.18)   |
|                 |        |     |      | HOMO→LUMO+3(0.11)   |

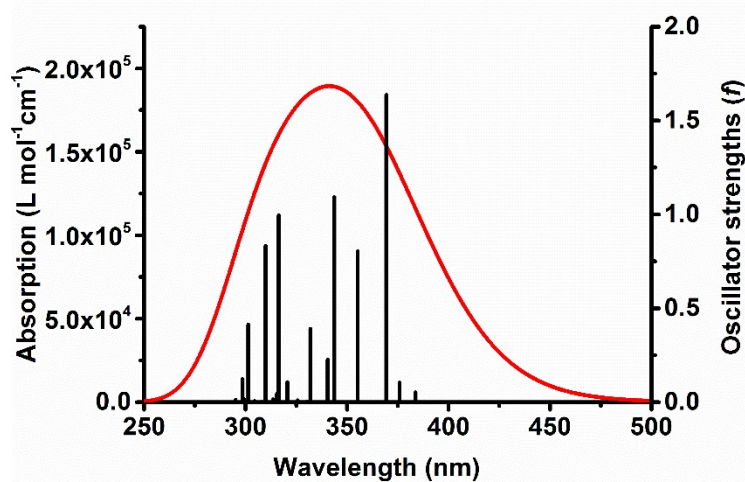

Fig. S19 Simulated UV-vis spectra of *bis-pm-TC* in dichloromethane.

Table S10. Main contribution of individual transition to the peak of *bis-pm-TC* ( $\lambda=341.2$  nm)

| Transition      | Contribution |
|-----------------|--------------|
| S <sub>6</sub>  | 23.2%        |
| S <sub>3</sub>  | 21.6%        |
| S <sub>4</sub>  | 15.1%        |
| S <sub>14</sub> | 12.8%        |

## SUPPORTING INFORMATION

**Table S11.** The TD DFT calculated absorption maxima ( $\lambda_{\max}$ , nm), oscillator strengths ( $f$ ), and major transition in dichloromethane of *bis-pm-TC*.

| state           | Energy | $\lambda_{\max}$ | $f$  | Description         |
|-----------------|--------|------------------|------|---------------------|
| S <sub>3</sub>  | 3.3566 | 369              | 1.64 | HOMO-3→LUMO (0.32)  |
|                 |        |                  |      | HOMO-2→LUMO+1(0.11) |
|                 |        |                  |      | HOMO-1→LUMO+3(0.10) |
|                 |        |                  |      | HOMO→LUMO(0.60)     |
| S <sub>4</sub>  | 3.4896 | 355              | 0.80 | HOMO-2→LUMO(0.60)   |
|                 |        |                  |      | HOMO-1→LUMO+2(0.20) |
|                 |        |                  |      | HOMO→LUMO+1(0.28)   |
| S <sub>6</sub>  | 3.6062 | 344              | 1.09 | HOMO-7→LUMO(0.11)   |
|                 |        |                  |      | HOMO-3→LUMO(0.31)   |
|                 |        |                  |      | HOMO-2→LUMO+1(0.54) |
|                 |        |                  |      | HOMO-2→LUMO+4(0.21) |
| S <sub>14</sub> | 3.9190 | 316              | 1.00 | HOMO-7→LUMO(0.10)   |
|                 |        |                  |      | HOMO-2→LUMO+1(0.13) |
|                 |        |                  |      | HOMO-1→LUMO+3(0.55) |
|                 |        |                  |      | HOMO→LUMO+5(0.37)   |

### 2.8.2 Simulated ECD spectra

To confirm the absolute configuration of *bis-po-CC* and *bis-pm-TC*, we calculated the ECD of *R<sub>p</sub>*- configuration of *bis-po-CC* and *bis-pm-TC* in dichloromethane by TD-DFT at B3LYP/6-311G (d, p) level. The calculated major transitions, related rotatory strengths and oscillator strengths are shown in Table S11 and Table S12. The calculated ECD curves are shown in Fig. S20. For both of them, we found similar orbital shapes and transitions. HOMO and LUMO are delocalized over the two rings, all these transitions are  $\pi \rightarrow \pi^*$  transitions. The transition density of S<sub>1</sub> excitation is shown in Fig. S21. For *bis-po-CC*, the calculated positive rotatory strengths at 419 nm (MO318 to MO319) are associated with the experimentally observed positive cotton effect (CE) at 391 nm. The negative rotatory strength at 393 nm (MO318 to MO321) are associated with the experimentally observed negative CE at 335 nm. Therefore, it was considered that the short dashed line was the configuration of *R<sub>p</sub>*.

For *bis-pm-TC*, the calculated positive rotatory strengths at 377 nm (MO316 to MO320) are associated with the experimentally observed positive cotton effect (CE) at 337 nm. The negative rotatory strength at 412 nm (MO317 to MO320) are associated with the experimentally observed negative CE at 384 nm. Therefore, it was considered that the short dashed line was the configuration of *R<sub>p</sub>*.

## SUPPORTING INFORMATION

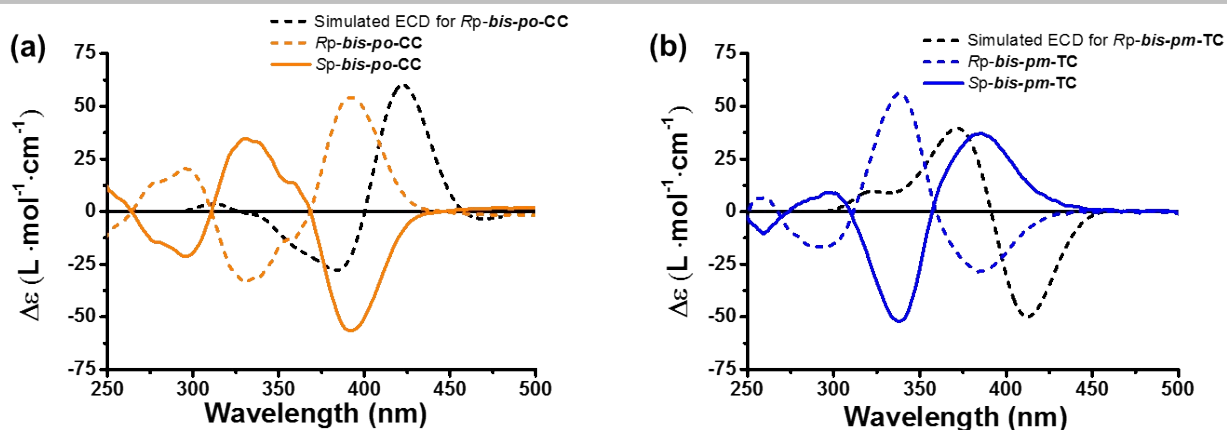

**Fig. S20** The calculated and experimental ECD curves in dichloromethane of (a) *bis-po-CC* and (b) *bis-pm-TC*.

**Table S12.** The TD B3LYP/6-311G (d, p) calculated excitation energy ( $\Delta E$ , eV), wavelength ( $\lambda$ , nm), oscillator strengths ( $f$ ), rotatory strength in velocity form ( $R_{\text{vel}}$ ,  $10^{-4}$  cgs), rotatory strength in length form ( $R_{\text{len}}$ ,  $10^{-4}$  cgs) and major transition in of dichloromethane of *bis-po-CC*.

| state | major transition  | $\Delta E$ (eV) | $\lambda$ (nm) | $f$  | $R_{\text{vel}}$ ( $10^{-4}$ cgs) | $R_{\text{len}}$ ( $10^{-4}$ cgs) |
|-------|-------------------|-----------------|----------------|------|-----------------------------------|-----------------------------------|
| 1     | 318→319(0.63462)  | 2.82            | 440            | 0.36 | -481.0                            | -487.4                            |
| 2     | 317→320(0.59744)  | 2.96            | 419            | 0.22 | 2260.5                            | 2268.7                            |
| 3     | 317→319(0.57086)  | 3.05            | 407            | 0.98 | -691.2                            | -698.6                            |
| 4     | 318→321(0.45314)  | 3.15            | 393            | 1.35 | -504/1                            | -507.6                            |
| 14    | 314→319(0.43813)  | 3.53            | 351            | 0.39 | -205.9                            | -208.0                            |
| 16    | 316→322(0.47339)  | 3.60            | 344            | 0.08 | 179.5                             | 183.7                             |
| 24    | 313→321(-0.27736) | 3.85            | 322            | 0.13 | -313.1                            | -317.3                            |
| 28    | 317→324(0.50462)  | 3.91            | 317            | 0.03 | 182.7                             | 185.8                             |

**Table S13.** The TD B3LYP/6-311G (d, p) calculated excitation energy ( $\Delta E$ , eV), wavelength ( $\lambda$ , nm), oscillator strengths ( $f$ ), rotatory strength in velocity form ( $R_{\text{vel}}$ ,  $10^{-4}$  cgs), rotatory strength in length form ( $R_{\text{len}}$ ,  $10^{-4}$  cgs) and major transition in of dichloromethane of *bis-pm-TC*.

| state | major transition | $\Delta E$ (eV) | $\lambda$ (nm) | $f$  | $R_{\text{vel}}$ ( $10^{-4}$ cgs) | $R_{\text{len}}$ ( $10^{-4}$ cgs) |
|-------|------------------|-----------------|----------------|------|-----------------------------------|-----------------------------------|
| 1     | 318→320(0.51613) | 2.95            | 420            | 0.10 | 1542.5                            | 1546.0                            |
| 2     | 317→320(0.51228) | 3.00            | 412            | 0.11 | -4014.8                           | -4031.4                           |
| 6     | 316→320(0.66614) | 3.29            | 377            | 2.10 | 607.5                             | 615.3                             |
| 14    | 317→322(0.59531) | 3.58            | 346            | 0.69 | 244.5                             | 246.8                             |
| 24    | 316→323(0.54587) | 3.81            | 325            | 0.02 | 47.1                              | 48.7                              |

## SUPPORTING INFORMATION

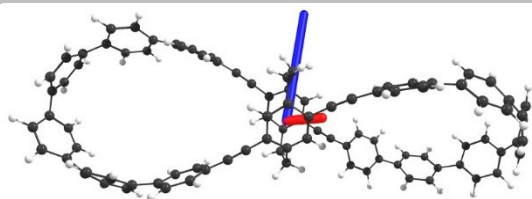

***bis-po-CC***  
S<sub>1</sub> transition dipole moments  
 $|\mu| = 5.46 \times 10^{-17} \text{ esu cm}$   
 $|m| = 7.32 \times 10^{-20} \text{ erg G}^{-1}$   
 $\theta_{\mu,m} = 97^\circ$

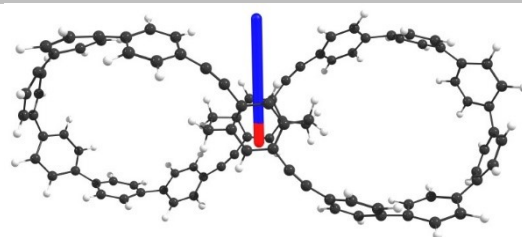

***bis-pm-TC***  
S<sub>1</sub> transition dipole moments  
 $|\mu| = 2.91 \times 10^{-18} \text{ esu cm}$   
 $|m| = 5.30 \times 10^{-20} \text{ erg G}^{-1}$   
 $\theta_{\mu,m} = 0^\circ$

**Fig. S21** Transition dipole moments of *bis-po-CC* and *bis-pm-TC*. For the dipole moments, the EDTM vector is in red, and the MDTM vector is in blue.

2.8.3 *LOL- $\pi$  isosurfaces*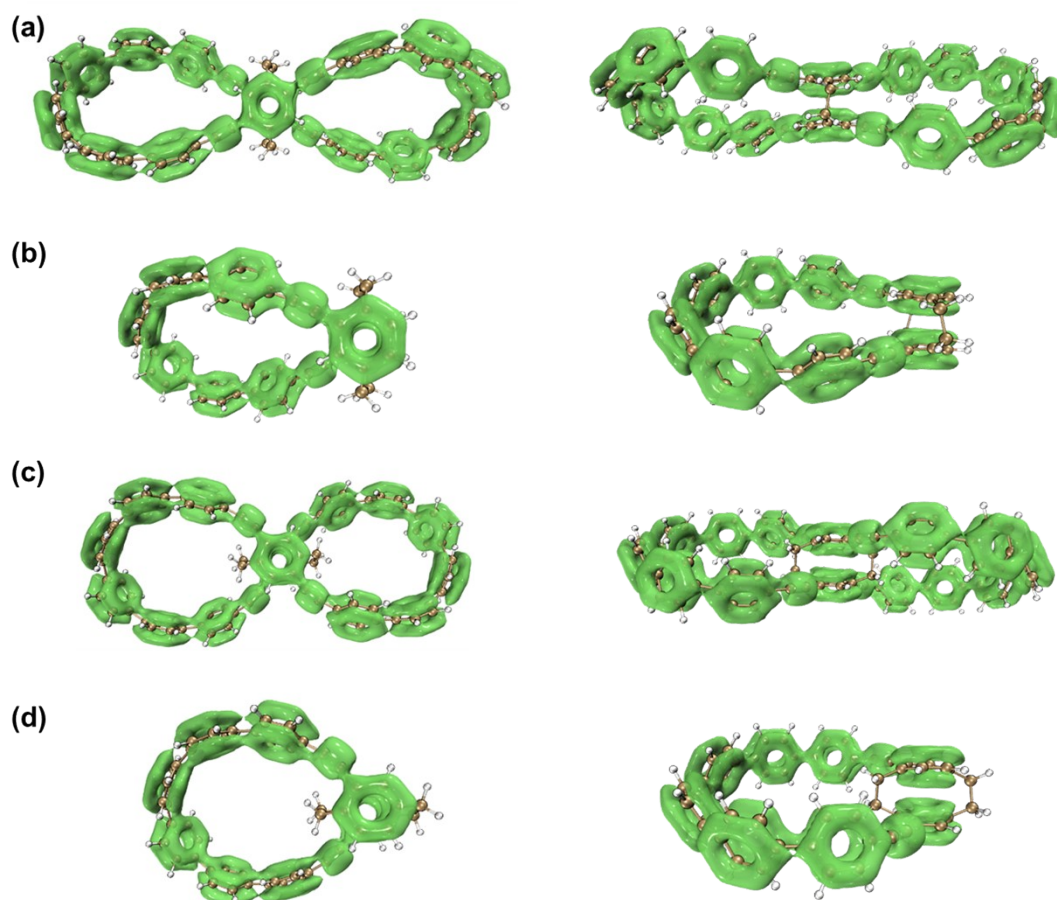

**Fig. S22** (a) LOL- $\pi$  isosurfaces (isovalued = 0.30) for (a) *bis-po-CC*, (b) semi-macrocycle *po-PCP-[6]CPP*, (c) *bis-pm-TC* and (d) semi-macrocycle *pm-PCP-[6]CPP*.



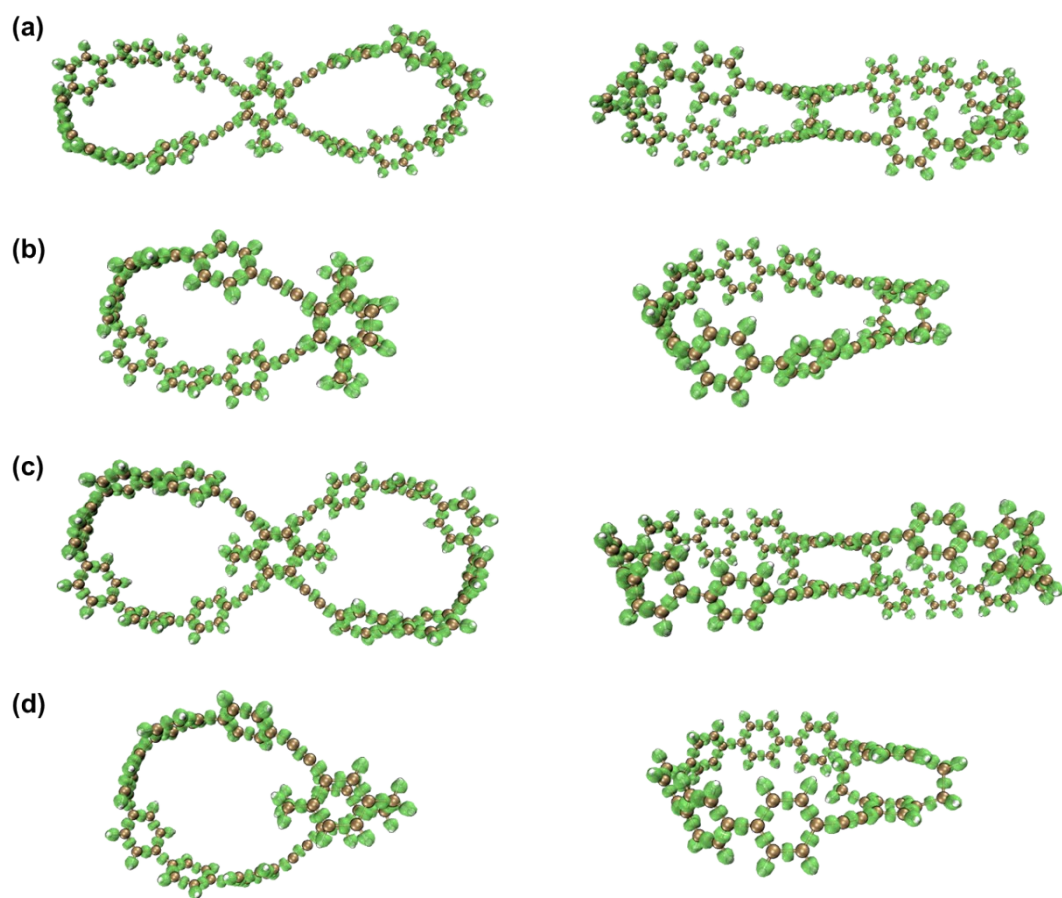

**Fig. S23** (a) LOL- $\sigma$  isosurfaces (isovalue = 0.60) for (a) **bis-po-CC**, (b) semi-macrocycle **po-PCP-[6]CPP**, (c) **bis-pm-TC** and (d) semi-macrocycle **pm-PCP-[6]CPP**.

#### 2.8.4 Cartesian coordinates of optimized species.

Optimized  $S_0$  geometry of compound **bis-po-CC**.

| Center Number | Atomic Number | Atomic Type | Coordinates (Angstroms) |           |           |
|---------------|---------------|-------------|-------------------------|-----------|-----------|
|               |               |             | X                       | Y         | Z         |
| 1             | 6             | 0           | 2.448056                | 1.638068  | 1.852517  |
| 2             | 6             | 0           | 2.295182                | -1.486644 | -1.595137 |
| 3             | 6             | 0           | 3.502076                | 2.233815  | 1.994157  |
| 4             | 6             | 0           | 3.316329                | -2.121098 | -1.796037 |
| 5             | 6             | 0           | -1.191715               | 0.901957  | -1.395110 |
| 6             | 6             | 0           | -1.276672               | -0.503655 | -1.326646 |
| 7             | 6             | 0           | -0.018564               | 1.557144  | 1.580985  |
| 8             | 6             | 0           | -1.168068               | 0.795342  | 1.788559  |
| 9             | 6             | 0           | -1.134819               | -0.614295 | 1.849232  |
| 10            | 6             | 0           | 0.100128                | -1.273935 | 1.619775  |

## SUPPORTING INFORMATION

|    |   |   |            |           |           |
|----|---|---|------------|-----------|-----------|
| 11 | 6 | 0 | 1.226646   | 0.903512  | 1.765147  |
| 12 | 6 | 0 | 1.258188   | -0.506258 | 1.744516  |
| 13 | 6 | 0 | 0.162937   | -2.658377 | 1.009543  |
| 14 | 6 | 0 | -0.258486  | -2.673392 | -0.535581 |
| 15 | 6 | 0 | -0.147009  | -1.309991 | -1.185093 |
| 16 | 6 | 0 | 0.077377   | 1.513753  | -1.238235 |
| 17 | 6 | 0 | 1.197241   | 0.701990  | -1.423469 |
| 18 | 6 | 0 | 1.109541   | -0.705287 | -1.440241 |
| 19 | 6 | 0 | -0.112924  | 2.923240  | 0.933674  |
| 20 | 6 | 0 | 0.224679   | 2.894275  | -0.632184 |
| 21 | 6 | 0 | -2.388055  | 1.675680  | -1.498467 |
| 22 | 1 | 0 | -2.262030  | -0.954076 | -1.254258 |
| 23 | 1 | 0 | -2.137764  | 1.283735  | 1.770361  |
| 24 | 6 | 0 | -2.349217  | -1.341691 | 2.011878  |
| 25 | 1 | 0 | -0.489566  | -3.363038 | 1.533805  |
| 26 | 1 | 0 | 1.186082   | -3.034294 | 1.092070  |
| 27 | 1 | 0 | -1.293957  | -3.016083 | -0.608082 |
| 28 | 1 | 0 | 0.369420   | -3.414561 | -1.039036 |
| 29 | 1 | 0 | 2.184823   | 1.153437  | -1.425795 |
| 30 | 1 | 0 | 0.567965   | 3.640796  | 1.401264  |
| 31 | 1 | 0 | -1.129505  | 3.304557  | 1.060349  |
| 32 | 1 | 0 | 1.254819   | 3.233001  | -0.770148 |
| 33 | 1 | 0 | -0.429078  | 3.623232  | -1.120431 |
| 34 | 6 | 0 | -3.428638  | 2.289127  | -1.661130 |
| 35 | 6 | 0 | -3.395978  | -1.936887 | 2.204978  |
| 36 | 1 | 0 | 2.226173   | -0.995704 | 1.692865  |
| 37 | 6 | 0 | -4.680430  | -2.514811 | 2.427788  |
| 38 | 6 | 0 | -4.715465  | 2.889269  | -1.825608 |
| 39 | 6 | 0 | -5.614833  | -1.838130 | 3.239059  |
| 40 | 6 | 0 | -6.919289  | -2.298380 | 3.350965  |
| 41 | 6 | 0 | -7.355502  | -3.445164 | 2.658755  |
| 42 | 6 | 0 | -5.085073  | -3.714343 | 1.806426  |
| 43 | 6 | 0 | -6.396339  | -4.165299 | 1.921324  |
| 44 | 6 | 0 | -8.810976  | -3.720109 | 2.566877  |
| 45 | 6 | 0 | -9.707000  | -3.376782 | 3.597908  |
| 46 | 6 | 0 | -11.070398 | -3.242772 | 3.352385  |
| 47 | 6 | 0 | -11.597438 | -3.430097 | 2.059202  |
| 48 | 6 | 0 | -9.369268  | -4.114546 | 1.338516  |
| 49 | 6 | 0 | -10.730217 | -3.970824 | 1.090457  |
| 50 | 6 | 0 | -12.846759 | -2.766940 | 1.600688  |
| 51 | 6 | 0 | -13.493205 | -3.111922 | 0.396267  |
| 52 | 6 | 0 | -14.191133 | -2.158205 | -0.339685 |
| 53 | 6 | 0 | -14.262414 | -0.818603 | 0.096005  |
| 54 | 6 | 0 | -13.187970 | -1.523639 | 2.164881  |
| 55 | 6 | 0 | -13.881483 | -0.570152 | 1.428618  |
| 56 | 6 | 0 | -5.171989  | 3.334514  | -3.083047 |
| 57 | 6 | 0 | -6.491936  | 3.740887  | -3.258179 |
| 58 | 6 | 0 | -7.409835  | 3.718398  | -2.191481 |
| 59 | 6 | 0 | -5.605205  | 2.952082  | -0.735897 |

## SUPPORTING INFORMATION

|     |   |   |            |           |           |
|-----|---|---|------------|-----------|-----------|
| 60  | 6 | 0 | -6.919700  | 3.356869  | -0.920367 |
| 61  | 6 | 0 | -8.875806  | 3.860877  | -2.377153 |
| 62  | 6 | 0 | -9.507647  | 3.372401  | -3.536541 |
| 63  | 6 | 0 | -10.871434 | 3.092545  | -3.550610 |
| 64  | 6 | 0 | -11.660959 | 3.265658  | -2.396913 |
| 65  | 6 | 0 | -9.710880  | 4.256753  | -1.316545 |
| 66  | 6 | 0 | -11.068970 | 3.961002  | -1.323875 |
| 67  | 6 | 0 | -12.879397 | 2.452135  | -2.139717 |
| 68  | 6 | 0 | -12.971171 | 1.179238  | -2.733562 |
| 69  | 6 | 0 | -13.647396 | 0.141663  | -2.103808 |
| 70  | 6 | 0 | -14.260951 | 0.329752  | -0.850592 |
| 71  | 6 | 0 | -13.749465 | 2.704284  | -1.058643 |
| 72  | 6 | 0 | -14.428155 | 1.664828  | -0.427869 |
| 73  | 6 | 0 | 4.792737   | 2.823270  | 2.165548  |
| 74  | 6 | 0 | 4.571796   | -2.757723 | -2.043482 |
| 75  | 1 | 0 | -5.318233  | -0.922462 | 3.739963  |
| 76  | 1 | 0 | -7.633478  | -1.715362 | 3.923023  |
| 77  | 1 | 0 | -4.373058  | -4.269505 | 1.204355  |
| 78  | 1 | 0 | -6.686047  | -5.076755 | 1.407284  |
| 79  | 1 | 0 | -9.325952  | -3.152641 | 4.589937  |
| 80  | 1 | 0 | -11.718124 | -2.911893 | 4.158713  |
| 81  | 1 | 0 | -8.718917  | -4.408824 | 0.520829  |
| 82  | 1 | 0 | -11.093096 | -4.147021 | 0.083340  |
| 83  | 1 | 0 | -13.360926 | -4.104151 | -0.025257 |
| 84  | 1 | 0 | -14.579699 | -2.433822 | -1.315715 |
| 85  | 1 | 0 | -12.757235 | -1.224685 | 3.114710  |
| 86  | 1 | 0 | -13.958016 | 0.433316  | 1.833473  |
| 87  | 1 | 0 | -4.493687  | 3.323526  | -3.930041 |
| 88  | 1 | 0 | -6.818958  | 4.051802  | -4.245717 |
| 89  | 1 | 0 | -5.271152  | 2.627038  | 0.243969  |
| 90  | 1 | 0 | -7.598769  | 3.315338  | -0.075848 |
| 91  | 1 | 0 | -8.911816  | 3.099660  | -4.402142 |
| 92  | 1 | 0 | -11.298976 | 2.635903  | -4.437871 |
| 93  | 1 | 0 | -9.281484  | 4.720883  | -0.434091 |
| 94  | 1 | 0 | -11.645516 | 4.161642  | -0.427048 |
| 95  | 1 | 0 | -12.363434 | 0.939564  | -3.599305 |
| 96  | 1 | 0 | -13.532087 | -0.859990 | -2.503783 |
| 97  | 1 | 0 | -13.814411 | 3.701824  | -0.634282 |
| 98  | 1 | 0 | -14.996982 | 1.883311  | 0.471255  |
| 99  | 6 | 0 | 5.139448   | -2.746202 | -3.334437 |
| 100 | 6 | 0 | 6.438421   | -3.194545 | -3.542675 |
| 101 | 6 | 0 | 7.229937   | -3.661985 | -2.476184 |
| 102 | 6 | 0 | 6.620544   | -3.765274 | -1.210599 |
| 103 | 6 | 0 | 5.319562   | -3.325925 | -0.994068 |
| 104 | 6 | 0 | 8.699300   | -3.831263 | -2.601429 |
| 105 | 6 | 0 | 9.444148   | -4.671355 | -1.751407 |
| 106 | 6 | 0 | 10.819429  | -4.511075 | -1.603843 |
| 107 | 6 | 0 | 11.511516  | -3.491990 | -2.288269 |
| 108 | 6 | 0 | 10.796360  | -2.796541 | -3.281906 |

## SUPPORTING INFORMATION

|     |   |   |           |           |           |
|-----|---|---|-----------|-----------|-----------|
| 109 | 6 | 0 | 9.425044  | -2.962481 | -3.435496 |
| 110 | 6 | 0 | 12.774929 | -2.896163 | -1.778760 |
| 111 | 6 | 0 | 13.007555 | -2.898943 | -0.390982 |
| 112 | 6 | 0 | 13.734943 | -1.880647 | 0.214198  |
| 113 | 6 | 0 | 14.284022 | -0.987553 | -1.941123 |
| 114 | 6 | 0 | 13.556326 | -2.008408 | -2.546814 |
| 115 | 6 | 0 | 14.257299 | -0.813915 | -0.542164 |
| 116 | 6 | 0 | 5.435217  | 2.792038  | 3.420616  |
| 117 | 6 | 0 | 6.760096  | 3.191857  | 3.549925  |
| 118 | 6 | 0 | 7.503789  | 3.628277  | 2.436916  |
| 119 | 6 | 0 | 6.824582  | 3.752896  | 1.209354  |
| 120 | 6 | 0 | 5.497564  | 3.362275  | 1.071884  |
| 121 | 6 | 0 | 8.983197  | 3.743744  | 2.474556  |
| 122 | 6 | 0 | 9.724982  | 2.850645  | 3.267892  |
| 123 | 6 | 0 | 11.078112 | 2.635115  | 3.035117  |
| 124 | 6 | 0 | 11.758386 | 3.302367  | 1.998525  |
| 125 | 6 | 0 | 11.064326 | 4.344680  | 1.352049  |
| 126 | 6 | 0 | 9.706715  | 4.554838  | 1.579177  |
| 127 | 6 | 0 | 12.967791 | 2.660960  | 1.418115  |
| 128 | 6 | 0 | 13.758343 | 1.743919  | 2.141191  |
| 129 | 6 | 0 | 14.412525 | 0.697822  | 1.496202  |
| 130 | 6 | 0 | 14.300443 | 0.527136  | 0.101108  |
| 131 | 6 | 0 | 13.776028 | 1.613568  | -0.625160 |
| 132 | 6 | 0 | 13.121985 | 2.657175  | 0.019405  |
| 133 | 1 | 0 | 4.564637  | -2.348626 | -4.164477 |
| 134 | 1 | 0 | 6.855966  | -3.147667 | -4.543560 |
| 135 | 1 | 0 | 7.200820  | -4.117157 | -0.363945 |
| 136 | 1 | 0 | 4.895208  | -3.362991 | 0.003955  |
| 137 | 1 | 0 | 8.935661  | -5.421138 | -1.152352 |
| 138 | 1 | 0 | 11.344158 | -5.136981 | -0.888218 |
| 139 | 1 | 0 | 11.285789 | -2.010876 | -3.847461 |
| 140 | 1 | 0 | 8.898317  | -2.308232 | -4.122668 |
| 141 | 1 | 0 | 12.471473 | -3.593974 | 0.246708  |
| 142 | 1 | 0 | 13.730201 | -1.821748 | 1.297457  |
| 143 | 1 | 0 | 14.777902 | -0.252791 | -2.570515 |
| 144 | 1 | 0 | 13.510104 | -2.043860 | -3.631302 |
| 145 | 1 | 0 | 4.896288  | 2.417231  | 4.284639  |
| 146 | 1 | 0 | 7.234022  | 3.131116  | 4.524605  |
| 147 | 1 | 0 | 7.366022  | 4.082454  | 0.328641  |
| 148 | 1 | 0 | 5.016338  | 3.414271  | 0.100684  |
| 149 | 1 | 0 | 9.216415  | 2.217128  | 3.987408  |
| 150 | 1 | 0 | 11.571396 | 1.834048  | 3.575184  |
| 151 | 1 | 0 | 11.568335 | 4.950392  | 0.604867  |
| 152 | 1 | 0 | 9.191363  | 5.321695  | 1.008265  |
| 153 | 1 | 0 | 13.775222 | 1.779662  | 3.226475  |
| 154 | 1 | 0 | 14.913980 | -0.055279 | 2.097245  |
| 155 | 1 | 0 | 13.708561 | 1.556649  | -1.706447 |
| 156 | 1 | 0 | 12.577210 | 3.372453  | -0.587765 |

## SUPPORTING INFORMATION

Optimized S<sub>0</sub> geometry of compound *bis-pm-TC*.

| Center<br>Number | Atomic<br>Number | Atomic<br>Type | Coordinates (Angstroms) |           |           |
|------------------|------------------|----------------|-------------------------|-----------|-----------|
|                  |                  |                | X                       | Y         | Z         |
| 1                | 6                | 0              | -3.777905               | -3.838395 | -1.950557 |
| 2                | 6                | 0              | -4.241171               | -4.759079 | -0.990036 |
| 3                | 6                | 0              | -5.565981               | -5.188145 | -1.003479 |
| 4                | 6                | 0              | -6.478552               | -4.716299 | -1.966986 |
| 5                | 6                | 0              | -4.649482               | -3.478785 | -2.999557 |
| 6                | 6                | 0              | -5.968101               | -3.910417 | -3.003542 |
| 7                | 1                | 0              | -3.575924               | -5.085888 | -0.197325 |
| 8                | 1                | 0              | -5.907430               | -5.857567 | -0.219843 |
| 9                | 1                | 0              | -4.302415               | -2.793551 | -3.765851 |
| 10               | 1                | 0              | -6.637371               | -3.531877 | -3.768810 |
| 11               | 6                | 0              | -6.477801               | 4.716279  | 1.967000  |
| 12               | 6                | 0              | -5.565217               | 5.187907  | 1.003398  |
| 13               | 6                | 0              | -5.967422               | 3.910341  | 3.003547  |
| 14               | 6                | 0              | -4.648889               | 3.478445  | 2.999466  |
| 15               | 6                | 0              | -3.777334               | 3.837830  | 1.950372  |
| 16               | 6                | 0              | -4.240497               | 4.758570  | 0.989854  |
| 17               | 1                | 0              | -3.575258               | 5.085195  | 0.197061  |
| 18               | 1                | 0              | -5.906601               | 5.857356  | 0.219757  |
| 19               | 1                | 0              | -6.636701               | 3.531962  | 3.768886  |
| 20               | 1                | 0              | -4.301895               | 2.793169  | 3.765756  |
| 21               | 6                | 0              | -7.950869               | -4.812964 | -1.796334 |
| 22               | 6                | 0              | -8.502168               | -4.742151 | -0.504623 |
| 23               | 6                | 0              | -9.824799               | -4.359207 | -0.308684 |
| 24               | 6                | 0              | -10.656608              | -4.027400 | -1.394664 |
| 25               | 6                | 0              | -8.843409               | -4.696003 | -2.880071 |
| 26               | 6                | 0              | -10.167405              | -4.313696 | -2.684100 |
| 27               | 6                | 0              | -11.973233              | -2.023648 | -2.041526 |
| 28               | 6                | 0              | -12.568799              | -0.840268 | -1.620572 |
| 29               | 6                | 0              | -11.795489              | -3.102596 | -1.156023 |
| 30               | 6                | 0              | -12.478790              | -3.032397 | 0.073897  |
| 31               | 6                | 0              | -13.082468              | -1.849362 | 0.492141  |
| 32               | 6                | 0              | -13.017964              | -0.681870 | -0.295894 |
| 33               | 1                | 0              | -7.858943               | -4.848130 | 0.362962  |
| 34               | 1                | 0              | -10.165935              | -4.174496 | 0.704706  |
| 35               | 1                | 0              | -8.482270               | -4.837073 | -3.894444 |
| 36               | 1                | 0              | -10.803790              | -4.159511 | -3.550584 |
| 37               | 1                | 0              | -11.496891              | -2.042887 | -3.016307 |
| 38               | 1                | 0              | -12.530460              | 0.016264  | -2.285134 |
| 39               | 1                | 0              | -12.460590              | -3.880457 | 0.752398  |
| 40               | 1                | 0              | -13.520146              | -1.810735 | 1.485144  |
| 41               | 6                | 0              | -13.082274              | 1.850335  | -0.491652 |
| 42               | 6                | 0              | -12.478419              | 3.033294  | -0.073451 |

## SUPPORTING INFORMATION

|    |   |   |            |           |           |
|----|---|---|------------|-----------|-----------|
| 43 | 6 | 0 | -12.568588 | 0.841181  | 1.621028  |
| 44 | 6 | 0 | -11.972849 | 2.024488  | 2.041941  |
| 45 | 6 | 0 | -11.795025 | 3.103410  | 1.156422  |
| 46 | 6 | 0 | -10.655999 | 4.028057  | 1.394974  |
| 47 | 6 | 0 | -9.824215  | 4.359723  | 0.308933  |
| 48 | 6 | 0 | -10.166666 | 4.314300  | 2.684372  |
| 49 | 6 | 0 | -8.842598  | 4.696406  | 2.880248  |
| 50 | 6 | 0 | -7.950112  | 4.813203  | 1.796449  |
| 51 | 6 | 0 | -8.501510  | 4.742460  | 0.504775  |
| 52 | 1 | 0 | -7.858325  | 4.848314  | -0.362855 |
| 53 | 1 | 0 | -12.460151 | 3.881348  | -0.751959 |
| 54 | 1 | 0 | -12.530310 | -0.015355 | 2.285589  |
| 55 | 1 | 0 | -10.165448 | 4.175046  | -0.704431 |
| 56 | 1 | 0 | -10.803016 | 4.160226  | 3.550902  |
| 57 | 1 | 0 | -8.481369  | 4.837434  | 3.894594  |
| 58 | 1 | 0 | -11.496438 | 2.043669  | 3.016689  |
| 59 | 6 | 0 | -1.654885  | 2.293650  | 1.712364  |
| 60 | 6 | 0 | -2.551145  | 3.115623  | 1.809057  |
| 61 | 6 | 0 | -1.655081  | -2.294707 | -1.712736 |
| 62 | 6 | 0 | -2.551531  | -3.116480 | -1.809349 |
| 63 | 6 | 0 | 3.777869   | -3.838552 | 1.950291  |
| 64 | 6 | 0 | 4.241204   | -4.759285 | 0.989851  |
| 65 | 6 | 0 | 5.566011   | -5.188352 | 1.003414  |
| 66 | 6 | 0 | 6.478513   | -4.716460 | 1.966963  |
| 67 | 6 | 0 | 4.649367   | -3.478899 | 2.999342  |
| 68 | 6 | 0 | 5.967984   | -3.910537 | 3.003448  |
| 69 | 1 | 0 | 3.576019   | -5.086114 | 0.197096  |
| 70 | 1 | 0 | 5.907518   | -5.857804 | 0.219829  |
| 71 | 1 | 0 | 4.302245   | -2.793623 | 3.765574  |
| 72 | 1 | 0 | 6.637199   | -3.531956 | 3.768745  |
| 73 | 6 | 0 | 6.477847   | 4.716399  | -1.966946 |
| 74 | 6 | 0 | 5.565216   | 5.187963  | -1.003357 |
| 75 | 6 | 0 | 5.967516   | 3.910539  | -3.003575 |
| 76 | 6 | 0 | 4.648982   | 3.478646  | -2.999590 |
| 77 | 6 | 0 | 3.777378   | 3.837951  | -1.950510 |
| 78 | 6 | 0 | 4.240496   | 4.758623  | -0.989905 |
| 79 | 1 | 0 | 3.575221   | 5.085184  | -0.197115 |
| 80 | 1 | 0 | 5.906563   | 5.857356  | -0.219652 |
| 81 | 1 | 0 | 6.636832   | 3.532212  | -3.768908 |
| 82 | 1 | 0 | 4.302025   | 2.793423  | -3.765944 |
| 83 | 6 | 0 | 1.654958   | 2.293712  | -1.712654 |
| 84 | 6 | 0 | 2.551198   | 3.115713  | -1.809283 |
| 85 | 6 | 0 | 0.804085   | -1.151745 | 1.610358  |
| 86 | 6 | 0 | -0.599164  | -1.246683 | 1.569572  |
| 87 | 6 | 0 | 1.407212   | -0.120261 | -1.406352 |
| 88 | 6 | 0 | 0.599221   | -1.246620 | -1.570007 |
| 89 | 6 | 0 | -0.804024  | -1.151680 | -1.610797 |
| 90 | 6 | 0 | -1.407316  | 0.119236  | -1.406203 |
| 91 | 6 | 0 | 0.803901   | 1.150680  | -1.610735 |

## SUPPORTING INFORMATION

---

|     |   |   |           |           |           |
|-----|---|---|-----------|-----------|-----------|
| 92  | 6 | 0 | -0.599344 | 1.245616  | -1.569805 |
| 93  | 6 | 0 | -2.772970 | 0.245474  | -0.760228 |
| 94  | 6 | 0 | -2.772875 | -0.246601 | 0.760154  |
| 95  | 6 | 0 | -1.407152 | -0.120314 | 1.405975  |
| 96  | 6 | 0 | 1.407378  | 0.119181  | 1.405830  |
| 97  | 6 | 0 | 0.599405  | 1.245553  | 1.569485  |
| 98  | 6 | 0 | -0.803837 | 1.150616  | 1.610419  |
| 99  | 6 | 0 | 2.772934  | -0.246578 | -0.760540 |
| 100 | 6 | 0 | 2.773030  | 0.245447  | 0.759861  |
| 101 | 1 | 0 | -1.049338 | -2.234138 | 1.527172  |
| 102 | 1 | 0 | 1.049391  | -2.234079 | -1.527645 |
| 103 | 1 | 0 | -1.049514 | 2.233068  | -1.527308 |
| 104 | 1 | 0 | -3.536213 | -0.332513 | -1.289825 |
| 105 | 1 | 0 | -3.077351 | 1.294684  | -0.785027 |
| 106 | 1 | 0 | -3.536073 | 0.331367  | 1.289835  |
| 107 | 1 | 0 | -3.077223 | -1.295820 | 0.784993  |
| 108 | 1 | 0 | 1.049572  | 2.233009  | 1.527008  |
| 109 | 1 | 0 | 3.536134  | 0.331408  | -1.290195 |
| 110 | 1 | 0 | 3.077281  | -1.295798 | -0.785413 |
| 111 | 1 | 0 | 3.077411  | 1.294657  | 0.784692  |
| 112 | 1 | 0 | 3.536276  | -0.332558 | 1.289432  |
| 113 | 6 | 0 | 1.655147  | -2.294775 | 1.712221  |
| 114 | 6 | 0 | 2.551534  | -3.116607 | 1.808917  |
| 115 | 6 | 0 | 7.950843  | -4.813104 | 1.796398  |
| 116 | 6 | 0 | 8.502208  | -4.742299 | 0.504712  |
| 117 | 6 | 0 | 9.824836  | -4.359316 | 0.308834  |
| 118 | 6 | 0 | 10.656578 | -4.027470 | 1.394854  |
| 119 | 6 | 0 | 8.843324  | -4.696102 | 2.880178  |
| 120 | 6 | 0 | 10.167322 | -4.313766 | 2.684268  |
| 121 | 6 | 0 | 11.973097 | -2.023674 | 2.041762  |
| 122 | 6 | 0 | 12.568653 | -0.840278 | 1.620837  |
| 123 | 6 | 0 | 11.795439 | -3.102629 | 1.156256  |
| 124 | 6 | 0 | 12.478797 | -3.032414 | -0.073634 |
| 125 | 6 | 0 | 13.082460 | -1.849362 | -0.491851 |
| 126 | 6 | 0 | 13.017886 | -0.681873 | 0.296187  |
| 127 | 1 | 0 | 7.859029  | -4.848303 | -0.362903 |
| 128 | 1 | 0 | 10.166024 | -4.174609 | -0.704540 |
| 129 | 1 | 0 | 8.482140  | -4.837170 | 3.894535  |
| 130 | 1 | 0 | 10.803660 | -4.159546 | 3.550781  |
| 131 | 1 | 0 | 11.496682 | -2.042916 | 3.016509  |
| 132 | 1 | 0 | 12.530231 | 0.016262  | 2.285385  |
| 133 | 1 | 0 | 12.460672 | -3.880492 | -0.752116 |
| 134 | 1 | 0 | 13.520219 | -1.810720 | -1.484818 |
| 135 | 6 | 0 | 13.082193 | 1.850331  | 0.491981  |
| 136 | 6 | 0 | 12.478358 | 3.033299  | 0.073775  |
| 137 | 6 | 0 | 13.017797 | 0.682842  | -0.296072 |
| 138 | 6 | 0 | 12.568558 | 0.841200  | -1.620726 |
| 139 | 6 | 0 | 11.972841 | 2.024519  | -2.041644 |
| 140 | 6 | 0 | 11.795007 | 3.103433  | -1.156122 |

## SUPPORTING INFORMATION

|     |   |   |            |           |           |
|-----|---|---|------------|-----------|-----------|
| 141 | 6 | 0 | 10.656001  | 4.028099  | -1.394708 |
| 142 | 6 | 0 | 9.824158   | 4.359727  | -0.308698 |
| 143 | 6 | 0 | 10.166748  | 4.314405  | -2.684122 |
| 144 | 6 | 0 | 8.842696   | 4.696541  | -2.880058 |
| 145 | 6 | 0 | 7.950149   | 4.813299  | -1.796306 |
| 146 | 6 | 0 | 8.501469   | 4.742483  | -0.504602 |
| 147 | 1 | 0 | 7.858232   | 4.848300  | 0.362993  |
| 148 | 1 | 0 | 13.519941  | 1.811736  | 1.484954  |
| 149 | 1 | 0 | 12.460098  | 3.881361  | 0.752272  |
| 150 | 1 | 0 | 12.530262  | -0.015337 | -2.285285 |
| 151 | 1 | 0 | 10.165335  | 4.175001  | 0.704676  |
| 152 | 1 | 0 | 10.803148  | 4.160358  | -3.550620 |
| 153 | 1 | 0 | 8.481529   | 4.837621  | -3.894419 |
| 154 | 1 | 0 | 11.496433  | 2.043703  | -3.016395 |
| 155 | 6 | 0 | -13.017861 | 0.682836  | 0.296381  |
| 156 | 1 | 0 | -13.520020 | 1.811759  | -1.484627 |

### 2.8.5 Cartesian coordinates of optimized species of LOL- isosurfaces.

Optimized S<sub>0</sub> geometry of compound *bis-po-CC*.

| Center<br>Number | Atomic<br>Number | Atomic<br>Type | Coordinates (Angstroms) |           |           |
|------------------|------------------|----------------|-------------------------|-----------|-----------|
|                  |                  |                | X                       | Y         | Z         |
| 1                | 6                | 0              | 2.449218                | -1.666704 | -1.843806 |
| 2                | 6                | 0              | 2.284917                | 1.492668  | 1.568694  |
| 3                | 6                | 0              | 3.501193                | -2.268668 | -1.968909 |
| 4                | 6                | 0              | 3.302051                | 2.135974  | 1.758480  |
| 5                | 6                | 0              | -1.192554               | -0.912290 | 1.378106  |
| 6                | 6                | 0              | -1.282633               | 0.492413  | 1.302844  |
| 7                | 6                | 0              | -0.017862               | -1.574097 | -1.590883 |
| 8                | 6                | 0              | -1.163786               | -0.808903 | -1.803482 |
| 9                | 6                | 0              | -1.125797               | 0.600043  | -1.869350 |
| 10               | 6                | 0              | 0.111405                | 1.254673  | -1.640993 |
| 11               | 6                | 0              | 1.230562                | -0.927053 | -1.772108 |
| 12               | 6                | 0              | 1.266835                | 0.482357  | -1.757551 |
| 13               | 6                | 0              | 0.175628                | 2.640605  | -1.033240 |
| 14               | 6                | 0              | -0.268493               | 2.661637  | 0.504715  |
| 15               | 6                | 0              | -0.155688               | 1.302194  | 1.163192  |
| 16               | 6                | 0              | 0.079741                | -1.518473 | 1.230058  |
| 17               | 6                | 0              | 1.195873                | -0.701589 | 1.413192  |
| 18               | 6                | 0              | 1.102940                | 0.705130  | 1.422974  |
| 19               | 6                | 0              | -0.117473               | -2.936301 | -0.935272 |
| 20               | 6                | 0              | 0.232196                | -2.900383 | 0.627200  |
| 21               | 6                | 0              | -2.386178               | -1.689798 | 1.471766  |



## SUPPORTING INFORMATION

|    |   |   |            |           |           |
|----|---|---|------------|-----------|-----------|
| 22 | 1 | 0 | -2.270654  | 0.936339  | 1.219602  |
| 23 | 1 | 0 | -2.136598  | -1.291947 | -1.779520 |
| 24 | 6 | 0 | -2.337172  | 1.332170  | -2.027759 |
| 25 | 1 | 0 | -0.462972  | 3.349973  | -1.570378 |
| 26 | 1 | 0 | 1.204281   | 3.007967  | -1.099362 |
| 27 | 1 | 0 | -1.309374  | 2.995006  | 0.558302  |
| 28 | 1 | 0 | 0.345582   | 3.411790  | 1.014167  |
| 29 | 1 | 0 | 2.186771   | -1.146952 | 1.414361  |
| 30 | 1 | 0 | 0.554321   | -3.662498 | -1.405073 |
| 31 | 1 | 0 | -1.139414  | -3.310221 | -1.050023 |
| 32 | 1 | 0 | 1.267488   | -3.230641 | 0.756200  |
| 33 | 1 | 0 | -0.412296  | -3.633564 | 1.123717  |
| 34 | 6 | 0 | -3.426070  | -2.305895 | 1.624937  |
| 35 | 6 | 0 | -3.380120  | 1.936143  | -2.211337 |
| 36 | 1 | 0 | 2.237716   | 0.966363  | -1.698881 |
| 37 | 6 | 0 | -4.662860  | 2.519683  | -2.423806 |
| 38 | 6 | 0 | -4.716139  | -2.900776 | 1.773738  |
| 39 | 6 | 0 | -5.607854  | 1.848312  | -3.226311 |
| 40 | 6 | 0 | -6.911291  | 2.313483  | -3.326498 |
| 41 | 6 | 0 | -7.337445  | 3.461471  | -2.631342 |
| 42 | 6 | 0 | -5.058514  | 3.720535  | -1.800366 |
| 43 | 6 | 0 | -6.368654  | 4.176747  | -1.903274 |
| 44 | 6 | 0 | -8.790661  | 3.740198  | -2.524861 |
| 45 | 6 | 0 | -9.695593  | 3.428030  | -3.557327 |
| 46 | 6 | 0 | -11.058092 | 3.296455  | -3.306308 |
| 47 | 6 | 0 | -11.576319 | 3.455610  | -2.006502 |
| 48 | 6 | 0 | -9.338940  | 4.104854  | -1.283693 |
| 49 | 6 | 0 | -10.698798 | 3.963695  | -1.030567 |
| 50 | 6 | 0 | -12.826691 | 2.791700  | -1.554139 |
| 51 | 6 | 0 | -13.478842 | 3.131344  | -0.351896 |
| 52 | 6 | 0 | -14.179529 | 2.174933  | 0.377423  |
| 53 | 6 | 0 | -14.248360 | 0.837074  | -0.062261 |
| 54 | 6 | 0 | -13.162629 | 1.549666  | -2.122035 |
| 55 | 6 | 0 | -13.858698 | 0.593539  | -1.392368 |
| 56 | 6 | 0 | -5.154608  | -3.439524 | 3.000105  |
| 57 | 6 | 0 | -6.475746  | -3.845248 | 3.168925  |
| 58 | 6 | 0 | -7.412144  | -3.733036 | 2.125465  |
| 59 | 6 | 0 | -5.628913  | -2.864983 | 0.702608  |
| 60 | 6 | 0 | -6.943064  | -3.272047 | 0.879547  |
| 61 | 6 | 0 | -8.875843  | -3.884607 | 2.317160  |
| 62 | 6 | 0 | -9.502284  | -3.434532 | 3.493942  |
| 63 | 6 | 0 | -10.865562 | -3.153261 | 3.522171  |
| 64 | 6 | 0 | -11.659758 | -3.287792 | 2.367373  |
| 65 | 6 | 0 | -9.715393  | -4.244174 | 1.248178  |
| 66 | 6 | 0 | -11.072734 | -3.947907 | 1.270577  |
| 67 | 6 | 0 | -12.874078 | -2.461777 | 2.134896  |
| 68 | 6 | 0 | -12.936738 | -1.190014 | 2.732823  |
| 69 | 6 | 0 | -13.609620 | -0.141290 | 2.118989  |
| 70 | 6 | 0 | -14.249282 | -0.315833 | 0.877873  |

## SUPPORTING INFORMATION

|     |   |   |            |           |           |
|-----|---|---|------------|-----------|-----------|
| 71  | 6 | 0 | -13.766588 | -2.697478 | 1.069194  |
| 72  | 6 | 0 | -14.441745 | -1.646675 | 0.454191  |
| 73  | 6 | 0 | 4.791593   | -2.860863 | -2.125985 |
| 74  | 6 | 0 | 4.554715   | 2.779468  | 1.997875  |
| 75  | 1 | 0 | -5.316772  | 0.931066  | -3.728853 |
| 76  | 1 | 0 | -7.636154  | 1.732341  | -3.888525 |
| 77  | 1 | 0 | -4.337369  | 4.272279  | -1.204814 |
| 78  | 1 | 0 | -6.652209  | 5.090685  | -1.388329 |
| 79  | 1 | 0 | -9.319864  | 3.228849  | -4.557601 |
| 80  | 1 | 0 | -11.715867 | 2.991084  | -4.115823 |
| 81  | 1 | 0 | -8.678659  | 4.367753  | -0.462286 |
| 82  | 1 | 0 | -11.054899 | 4.109145  | -0.015442 |
| 83  | 1 | 0 | -13.349191 | 4.124345  | 0.070886  |
| 84  | 1 | 0 | -14.575375 | 2.445267  | 1.353000  |
| 85  | 1 | 0 | -12.719348 | 1.253360  | -3.067706 |
| 86  | 1 | 0 | -13.926100 | -0.411802 | -1.795994 |
| 87  | 1 | 0 | -4.458200  | -3.500860 | 3.830896  |
| 88  | 1 | 0 | -6.790325  | -4.231801 | 4.134693  |
| 89  | 1 | 0 | -5.309155  | -2.459662 | -0.252430 |
| 90  | 1 | 0 | -7.642123  | -3.152161 | 0.058127  |
| 91  | 1 | 0 | -8.898798  | -3.188094 | 4.363200  |
| 92  | 1 | 0 | -11.291846 | -2.723553 | 4.424546  |
| 93  | 1 | 0 | -9.285708  | -4.677673 | 0.349357  |
| 94  | 1 | 0 | -11.654144 | -4.112197 | 0.368640  |
| 95  | 1 | 0 | -12.302242 | -0.962204 | 3.583252  |
| 96  | 1 | 0 | -13.467141 | 0.859499  | 2.514061  |
| 97  | 1 | 0 | -13.852480 | -3.694720 | 0.645469  |
| 98  | 1 | 0 | -15.031729 | -1.851806 | -0.435482 |
| 99  | 6 | 0 | 5.111086   | 2.809441  | 3.292952  |
| 100 | 6 | 0 | 6.408609   | 3.262774  | 3.498756  |
| 101 | 6 | 0 | 7.209959   | 3.697172  | 2.426617  |
| 102 | 6 | 0 | 6.612359   | 3.759643  | 1.153637  |
| 103 | 6 | 0 | 5.313698   | 3.313415  | 0.939362  |
| 104 | 6 | 0 | 8.678041   | 3.868631  | 2.556674  |
| 105 | 6 | 0 | 9.425893   | 4.708628  | 1.710139  |
| 106 | 6 | 0 | 10.801455  | 4.548754  | 1.567240  |
| 107 | 6 | 0 | 11.491519  | 3.530088  | 2.253002  |
| 108 | 6 | 0 | 10.772524  | 2.833539  | 3.242005  |
| 109 | 6 | 0 | 9.401019   | 2.999343  | 3.391232  |
| 110 | 6 | 0 | 12.754948  | 2.931735  | 1.748383  |
| 111 | 6 | 0 | 12.973240  | 2.902941  | 0.359460  |
| 112 | 6 | 0 | 13.702353  | 1.876943  | -0.229489 |
| 113 | 6 | 0 | 14.279644  | 1.038574  | 1.938469  |
| 114 | 6 | 0 | 13.549943  | 2.067156  | 2.527917  |
| 115 | 6 | 0 | 14.242007  | 0.832950  | 0.544624  |
| 116 | 6 | 0 | 5.429596   | -2.871705 | -3.383166 |
| 117 | 6 | 0 | 6.755312   | -3.271083 | -3.503957 |
| 118 | 6 | 0 | 7.504392   | -3.668274 | -2.380868 |
| 119 | 6 | 0 | 6.830366   | -3.752031 | -1.147902 |

## SUPPORTING INFORMATION

|     |   |   |           |           |           |
|-----|---|---|-----------|-----------|-----------|
| 120 | 6 | 0 | 5.503352  | -3.359786 | -1.018664 |
| 121 | 6 | 0 | 8.983538  | -3.779202 | -2.416943 |
| 122 | 6 | 0 | 9.721591  | -2.882920 | -3.208705 |
| 123 | 6 | 0 | 11.073204 | -2.661011 | -2.974922 |
| 124 | 6 | 0 | 11.756547 | -3.325250 | -1.939491 |
| 125 | 6 | 0 | 11.066612 | -4.369680 | -1.293394 |
| 126 | 6 | 0 | 9.710301  | -4.585832 | -1.521068 |
| 127 | 6 | 0 | 12.961128 | -2.675719 | -1.359846 |
| 128 | 6 | 0 | 13.765989 | -1.778617 | -2.091088 |
| 129 | 6 | 0 | 14.417014 | -0.722295 | -1.460159 |
| 130 | 6 | 0 | 14.287807 | -0.520214 | -0.071262 |
| 131 | 6 | 0 | 13.745216 | -1.586224 | 0.670109  |
| 132 | 6 | 0 | 13.094485 | -2.639899 | 0.039623  |
| 133 | 1 | 0 | 4.525996  | 2.437502  | 4.128449  |
| 134 | 1 | 0 | 6.819758  | 3.248505  | 4.504355  |
| 135 | 1 | 0 | 7.204750  | 4.080293  | 0.301928  |
| 136 | 1 | 0 | 4.898326  | 3.314672  | -0.063810 |
| 137 | 1 | 0 | 8.916456  | 5.459368  | 1.111551  |
| 138 | 1 | 0 | 11.331597 | 5.175592  | 0.855015  |
| 139 | 1 | 0 | 11.260953 | 2.042736  | 3.802605  |
| 140 | 1 | 0 | 8.868318  | 2.340973  | 4.071045  |
| 141 | 1 | 0 | 12.418032 | 3.575282  | -0.287249 |
| 142 | 1 | 0 | 13.681614 | 1.787159  | -1.311093 |
| 143 | 1 | 0 | 14.787759 | 0.320955  | 2.577747  |
| 144 | 1 | 0 | 13.513094 | 2.130009  | 3.612402  |
| 145 | 1 | 0 | 4.883734  | -2.527008 | -4.256069 |
| 146 | 1 | 0 | 7.228365  | -3.243099 | -4.481649 |
| 147 | 1 | 0 | 7.380267  | -4.045600 | -0.258727 |
| 148 | 1 | 0 | 5.025568  | -3.375422 | -0.043799 |
| 149 | 1 | 0 | 9.206339  | -2.248470 | -3.923796 |
| 150 | 1 | 0 | 11.563368 | -1.852874 | -3.508634 |
| 151 | 1 | 0 | 11.576106 | -4.973151 | -0.546774 |
| 152 | 1 | 0 | 9.195256  | -5.355395 | -0.951898 |
| 153 | 1 | 0 | 13.797333 | -1.841534 | -3.175728 |
| 154 | 1 | 0 | 14.933262 | 0.015931  | -2.068694 |
| 155 | 1 | 0 | 13.656565 | -1.499110 | 1.748504  |
| 156 | 1 | 0 | 12.529350 | -3.334951 | 0.652830  |

Optimized S<sub>0</sub> geometry of compound *bis-pm-TC*.

| Center<br>Number | Atomic<br>Number | Atomic<br>Type | Coordinates (Angstroms) |          |          |
|------------------|------------------|----------------|-------------------------|----------|----------|
|                  |                  |                | X                       | Y        | Z        |
| 1                | 6                | 0              | -3.772440               | 3.842476 | 1.932816 |

## SUPPORTING INFORMATION

---

|    |   |   |            |           |           |
|----|---|---|------------|-----------|-----------|
| 2  | 6 | 0 | -4.231528  | 4.771537  | 0.978970  |
| 3  | 6 | 0 | -5.556154  | 5.200833  | 0.988914  |
| 4  | 6 | 0 | -6.473855  | 4.722742  | 1.943414  |
| 5  | 6 | 0 | -4.650426  | 3.475235  | 2.973263  |
| 6  | 6 | 0 | -5.968592  | 3.907348  | 2.974195  |
| 7  | 1 | 0 | -3.560015  | 5.104386  | 0.193130  |
| 8  | 1 | 0 | -5.895581  | 5.878639  | 0.210317  |
| 9  | 1 | 0 | -4.305166  | 2.781928  | 3.733935  |
| 10 | 1 | 0 | -6.645402  | 3.519912  | 3.729462  |
| 11 | 6 | 0 | -6.474403  | -4.722783 | -1.943522 |
| 12 | 6 | 0 | -5.556823  | -5.201032 | -0.988983 |
| 13 | 6 | 0 | -5.968966  | -3.907429 | -2.974249 |
| 14 | 6 | 0 | -4.650741  | -3.475496 | -2.973224 |
| 15 | 6 | 0 | -3.772866  | -3.842892 | -1.932739 |
| 16 | 6 | 0 | -4.232138  | -4.771923 | -0.978951 |
| 17 | 1 | 0 | -3.560716  | -5.104890 | -0.193082 |
| 18 | 1 | 0 | -5.896387  | -5.878817 | -0.210428 |
| 19 | 1 | 0 | -6.645678  | -3.519875 | -3.729543 |
| 20 | 1 | 0 | -4.305342  | -2.782212 | -3.733854 |
| 21 | 6 | 0 | -7.944964  | 4.819673  | 1.767828  |
| 22 | 6 | 0 | -8.492140  | 4.724928  | 0.476720  |
| 23 | 6 | 0 | -9.814772  | 4.341932  | 0.283270  |
| 24 | 6 | 0 | -10.651759 | 4.033725  | 1.371196  |
| 25 | 6 | 0 | -8.841647  | 4.724415  | 2.849608  |
| 26 | 6 | 0 | -10.165712 | 4.341875  | 2.656118  |
| 27 | 6 | 0 | -11.952051 | 2.025976  | 2.027878  |
| 28 | 6 | 0 | -12.548143 | 0.841237  | 1.612914  |
| 29 | 6 | 0 | -11.790526 | 3.107074  | 1.143220  |
| 30 | 6 | 0 | -12.488366 | 3.035106  | -0.077815 |
| 31 | 6 | 0 | -13.093144 | 1.850687  | -0.489686 |
| 32 | 6 | 0 | -13.014989 | 0.682633  | 0.295322  |
| 33 | 1 | 0 | -7.841871  | 4.807176  | -0.389128 |
| 34 | 1 | 0 | -10.152909 | 4.131909  | -0.726928 |
| 35 | 1 | 0 | -8.481252  | 4.885431  | 3.862200  |
| 36 | 1 | 0 | -10.808393 | 4.205689  | 3.522083  |
| 37 | 1 | 0 | -11.456362 | 2.045041  | 2.993741  |
| 38 | 1 | 0 | -12.491754 | -0.019717 | 2.271538  |
| 39 | 1 | 0 | -12.481639 | 3.886531  | -0.753712 |
| 40 | 1 | 0 | -13.545783 | 1.809595  | -1.476861 |
| 41 | 6 | 0 | -13.093421 | -1.849819 | 0.489236  |
| 42 | 6 | 0 | -12.488784 | -3.034321 | 0.077392  |
| 43 | 6 | 0 | -12.548175 | -0.840439 | -1.613335 |
| 44 | 6 | 0 | -11.952223 | -2.025258 | -2.028270 |
| 45 | 6 | 0 | -11.790891 | -3.106380 | -1.143607 |
| 46 | 6 | 0 | -10.652243 | -4.033188 | -1.371530 |
| 47 | 6 | 0 | -9.815360  | -4.341529 | -0.283561 |
| 48 | 6 | 0 | -10.166165 | -4.341387 | -2.656429 |
| 49 | 6 | 0 | -8.842142  | -4.724110 | -2.849849 |
| 50 | 6 | 0 | -7.945535  | -4.819513 | -1.768019 |

## SUPPORTING INFORMATION

|    |   |   |            |           |           |
|----|---|---|------------|-----------|-----------|
| 51 | 6 | 0 | -8.492772  | -4.724711 | -0.476941 |
| 52 | 1 | 0 | -7.842564  | -4.807061 | 0.388943  |
| 53 | 1 | 0 | -12.482208 | -3.885748 | 0.753287  |
| 54 | 1 | 0 | -12.491635 | 0.020510  | -2.271954 |
| 55 | 1 | 0 | -10.153525 | -4.131472 | 0.726621  |
| 56 | 1 | 0 | -10.808777 | -4.205093 | -3.522429 |
| 57 | 1 | 0 | -8.481713  | -4.885157 | -3.862423 |
| 58 | 1 | 0 | -11.456487 | -2.044390 | -2.994108 |
| 59 | 6 | 0 | -1.654690  | -2.295007 | -1.704647 |
| 60 | 6 | 0 | -2.546403  | -3.122085 | -1.794062 |
| 61 | 6 | 0 | -1.654460  | 2.294296  | 1.704901  |
| 62 | 6 | 0 | -2.546068  | 3.121495  | 1.794240  |
| 63 | 6 | 0 | 3.772550   | 3.842215  | -1.932992 |
| 64 | 6 | 0 | 4.231706   | 4.771465  | -0.979362 |
| 65 | 6 | 0 | 5.556331   | 5.200760  | -0.989484 |
| 66 | 6 | 0 | 6.473964   | 4.722487  | -1.943959 |
| 67 | 6 | 0 | 4.650462   | 3.474773  | -2.973429 |
| 68 | 6 | 0 | 5.968628   | 3.906888  | -2.974542 |
| 69 | 1 | 0 | 3.560251   | 5.104462  | -0.193535 |
| 70 | 1 | 0 | 5.895814   | 5.878713  | -0.211041 |
| 71 | 1 | 0 | 4.305151   | 2.781311  | -3.733937 |
| 72 | 1 | 0 | 6.645386   | 3.519297  | -3.729776 |
| 73 | 6 | 0 | 6.474322   | -4.722546 | 1.943944  |
| 74 | 6 | 0 | 5.556738   | -5.200892 | 0.989456  |
| 75 | 6 | 0 | 5.968879   | -3.907137 | 2.974624  |
| 76 | 6 | 0 | 4.650637   | -3.475253 | 2.973599  |
| 77 | 6 | 0 | 3.772753   | -3.842752 | 1.933158  |
| 78 | 6 | 0 | 4.232038   | -4.771830 | 0.979422  |
| 79 | 1 | 0 | 3.560603   | -5.104894 | 0.193605  |
| 80 | 1 | 0 | 5.896306   | -5.878733 | 0.210952  |
| 81 | 1 | 0 | 6.645589   | -3.519516 | 3.729886  |
| 82 | 1 | 0 | 4.305224   | -2.781944 | 3.734201  |
| 83 | 6 | 0 | 1.654432   | -2.295060 | 1.705078  |
| 84 | 6 | 0 | 2.546223   | -3.122053 | 1.794501  |
| 85 | 6 | 0 | 0.804292   | 1.150841  | -1.608770 |
| 86 | 6 | 0 | -0.598757  | 1.245313  | -1.568476 |
| 87 | 6 | 0 | 1.407002   | 0.119349  | 1.406624  |
| 88 | 6 | 0 | 0.598772   | 1.245336  | 1.568708  |
| 89 | 6 | 0 | -0.804283  | 1.150970  | 1.609012  |
| 90 | 6 | 0 | -1.407029  | -0.120138 | 1.406674  |
| 91 | 6 | 0 | 0.804262   | -1.151738 | 1.609104  |
| 92 | 6 | 0 | -0.598794  | -1.246108 | 1.568847  |
| 93 | 6 | 0 | -2.772911  | -0.246353 | 0.760376  |
| 94 | 6 | 0 | -2.772925  | 0.245677  | -0.759992 |
| 95 | 6 | 0 | -1.407072  | 0.119394  | -1.406340 |
| 96 | 6 | 0 | 1.406943   | -0.120301 | -1.406375 |
| 97 | 6 | 0 | 0.598624   | -1.246218 | -1.568495 |
| 98 | 6 | 0 | -0.804426  | -1.151747 | -1.608757 |
| 99 | 6 | 0 | 2.772868   | 0.245493  | 0.760278  |

## SUPPORTING INFORMATION

|     |   |   |           |           |           |
|-----|---|---|-----------|-----------|-----------|
| 100 | 6 | 0 | 2.772818  | -0.246587 | -0.760075 |
| 101 | 1 | 0 | -1.047557 | 2.233768  | -1.521568 |
| 102 | 1 | 0 | 1.047645  | 2.233756  | 1.521755  |
| 103 | 1 | 0 | -1.047669 | -2.234532 | 1.522005  |
| 104 | 1 | 0 | -3.537377 | 0.331523  | 1.290204  |
| 105 | 1 | 0 | -3.077627 | -1.296551 | 0.783124  |
| 106 | 1 | 0 | -3.537442 | -0.332152 | -1.289795 |
| 107 | 1 | 0 | -3.077582 | 1.295893  | -0.782722 |
| 108 | 1 | 0 | 1.047424  | -2.234673 | -1.521600 |
| 109 | 1 | 0 | 3.537333  | -0.332386 | 1.290104  |
| 110 | 1 | 0 | 3.077617  | 1.295682  | 0.782977  |
| 111 | 1 | 0 | 3.077463  | -1.296807 | -0.782787 |
| 112 | 1 | 0 | 3.537324  | 0.331218  | -1.289922 |
| 113 | 6 | 0 | 1.654550  | 2.294104  | -1.704690 |
| 114 | 6 | 0 | 2.546200  | 3.121244  | -1.794167 |
| 115 | 6 | 0 | 7.945083  | 4.819440  | -1.768481 |
| 116 | 6 | 0 | 8.492333  | 4.724923  | -0.477389 |
| 117 | 6 | 0 | 9.814969  | 4.341938  | -0.283948 |
| 118 | 6 | 0 | 10.651889 | 4.033524  | -1.371867 |
| 119 | 6 | 0 | 8.841701  | 4.723976  | -2.850297 |
| 120 | 6 | 0 | 10.165773 | 4.341453  | -2.656816 |
| 121 | 6 | 0 | 11.952118 | 2.025659  | -2.028299 |
| 122 | 6 | 0 | 12.548188 | 0.840962  | -1.613183 |
| 123 | 6 | 0 | 11.790642 | 3.106884  | -1.143789 |
| 124 | 6 | 0 | 12.488502 | 3.035068  | 0.077243  |
| 125 | 6 | 0 | 13.093248 | 1.850686  | 0.489270  |
| 126 | 6 | 0 | 13.015045 | 0.682525  | -0.295576 |
| 127 | 1 | 0 | 7.842116  | 4.807335  | 0.388482  |
| 128 | 1 | 0 | 10.153162 | 4.132087  | 0.726268  |
| 129 | 1 | 0 | 8.481249  | 4.884811  | -3.862897 |
| 130 | 1 | 0 | 10.808400 | 4.205094  | -3.522794 |
| 131 | 1 | 0 | 11.456410 | 2.044604  | -2.994155 |
| 132 | 1 | 0 | 12.491764 | -0.020082 | -2.271687 |
| 133 | 1 | 0 | 12.481805 | 3.886585  | 0.753023  |
| 134 | 1 | 0 | 13.545901 | 1.809717  | 1.476444  |
| 135 | 6 | 0 | 13.093422 | -1.849950 | -0.489156 |
| 136 | 6 | 0 | 12.488752 | -3.034384 | -0.077166 |
| 137 | 6 | 0 | 13.015089 | -0.681802 | 0.295696  |
| 138 | 6 | 0 | 12.548182 | -0.840288 | 1.613280  |
| 139 | 6 | 0 | 11.952197 | -2.025040 | 2.028362  |
| 140 | 6 | 0 | 11.790845 | -3.106270 | 1.143834  |
| 141 | 6 | 0 | 10.652172 | -4.033024 | 1.371862  |
| 142 | 6 | 0 | 9.815280  | -4.341464 | 0.283927  |
| 143 | 6 | 0 | 10.166094 | -4.341083 | 2.656794  |
| 144 | 6 | 0 | 8.842069  | -4.723774 | 2.850257  |
| 145 | 6 | 0 | 7.945455  | -4.819276 | 1.768441  |
| 146 | 6 | 0 | 8.492687  | -4.724608 | 0.477351  |
| 147 | 1 | 0 | 7.842477  | -4.807048 | -0.388523 |
| 148 | 1 | 0 | 13.546115 | -1.808936 | -1.476309 |

## SUPPORTING INFORMATION

|     |   |   |            |           |           |
|-----|---|---|------------|-----------|-----------|
| 149 | 1 | 0 | 12.482163  | -3.885898 | -0.752952 |
| 150 | 1 | 0 | 12.491654  | 0.020746  | 2.271788  |
| 151 | 1 | 0 | 10.153445  | -4.131520 | -0.726278 |
| 152 | 1 | 0 | 10.808713  | -4.204719 | 3.522777  |
| 153 | 1 | 0 | 8.481644   | -4.884727 | 3.862848  |
| 154 | 1 | 0 | 11.456451  | -2.044035 | 2.994197  |
| 155 | 6 | 0 | -13.015066 | -0.681774 | -0.295767 |
| 156 | 1 | 0 | -13.546107 | -1.808668 | 1.476387  |

### Optimized S<sub>0</sub> geometry of compound *po*-PCP-[6]CPP.

| Center<br>Number | Atomic<br>Number | Atomic<br>Type | Coordinates (Angstroms) |           |           |
|------------------|------------------|----------------|-------------------------|-----------|-----------|
|                  |                  |                | X                       | Y         | Z         |
| 1                | 6                | 0              | 5.419187                | -1.584778 | -0.902950 |
| 2                | 6                | 0              | -0.801567               | -4.403611 | -0.104258 |
| 3                | 6                | 0              | 5.359094                | -0.400715 | -1.666703 |
| 4                | 1                | 0              | 4.379247                | -0.010832 | -1.928844 |
| 5                | 6                | 0              | 4.213451                | -2.286364 | -0.603736 |
| 6                | 6                | 0              | 1.885754                | -3.499686 | -0.320520 |
| 7                | 6                | 0              | 3.171894                | -2.892628 | -0.422956 |
| 8                | 6                | 0              | -2.267507               | -4.574788 | 0.047579  |
| 9                | 6                | 0              | -0.300488               | -3.884055 | -1.313209 |
| 10               | 1                | 0              | -0.973407               | -3.750980 | -2.154884 |
| 11               | 6                | 0              | -2.901811               | -4.139959 | 1.223439  |
| 12               | 1                | 0              | -2.302125               | -3.869000 | 2.087605  |
| 13               | 6                | 0              | 6.504299                | 0.353896  | -1.941710 |
| 14               | 6                | 0              | 6.665429                | -1.987225 | -0.360343 |
| 15               | 6                | 0              | 1.417322                | -4.101650 | 0.864482  |
| 16               | 1                | 0              | 2.085204                | -4.188336 | 1.716351  |
| 17               | 6                | 0              | -4.266664               | -3.874624 | 1.246013  |
| 18               | 1                | 0              | -4.687667               | -3.393636 | 2.123554  |
| 19               | 6                | 0              | 1.008992                | -3.439909 | -1.422948 |
| 20               | 1                | 0              | 1.356844                | -2.993591 | -2.349354 |
| 21               | 6                | 0              | 0.100915                | -4.541499 | 0.966405  |
| 22               | 1                | 0              | -0.240171               | -4.975837 | 1.902375  |
| 23               | 6                | 0              | 5.358391                | 0.400970  | 1.666705  |
| 24               | 1                | 0              | 4.378444                | 0.011157  | 1.928570  |
| 25               | 6                | 0              | 7.740841                | -0.262678 | -1.706307 |
| 26               | 1                | 0              | 8.661148                | 0.236847  | -2.001699 |
| 27               | 6                | 0              | 5.418744                | 1.585057  | 0.902988  |
| 28               | 6                | 0              | -5.061980               | -4.033995 | 0.095981  |
| 29               | 6                | 0              | -3.097452               | -4.931643 | -1.032512 |
| 30               | 1                | 0              | -2.656129               | -5.359966 | -1.928648 |

## SUPPORTING INFORMATION

|    |   |   |           |           |           |
|----|---|---|-----------|-----------|-----------|
| 31 | 6 | 0 | 7.811981  | -1.407964 | -0.912824 |
| 32 | 1 | 0 | 8.787983  | -1.767541 | -0.593853 |
| 33 | 6 | 0 | -7.045568 | -2.794036 | 1.094245  |
| 34 | 1 | 0 | -7.002566 | -3.362338 | 2.019987  |
| 35 | 6 | 0 | -6.298403 | -3.218208 | -0.022492 |
| 36 | 6 | 0 | -6.520920 | -2.526545 | -1.226588 |
| 37 | 1 | 0 | -6.000769 | -2.835741 | -2.127994 |
| 38 | 6 | 0 | -7.201773 | -1.315426 | -1.241297 |
| 39 | 1 | 0 | -7.180028 | -0.727833 | -2.153524 |
| 40 | 6 | 0 | -7.692090 | -0.742268 | -0.053236 |
| 41 | 6 | 0 | -7.733836 | -1.584091 | 1.077419  |
| 42 | 1 | 0 | -8.210049 | -1.240230 | 1.991890  |
| 43 | 6 | 0 | 6.400589  | 1.843207  | -2.215345 |
| 44 | 1 | 0 | 5.378143  | 2.077273  | -2.528663 |
| 45 | 1 | 0 | 7.064753  | 2.150466  | -3.032301 |
| 46 | 6 | 0 | 6.503441  | -0.353807 | 1.941861  |
| 47 | 6 | 0 | 4.213111  | 2.286751  | 0.603609  |
| 48 | 6 | 0 | -7.201892 | 1.315088  | 1.241363  |
| 49 | 1 | 0 | -7.180053 | 0.727492  | 2.153587  |
| 50 | 6 | 0 | -4.464580 | -4.673308 | -1.007243 |
| 51 | 1 | 0 | -5.060679 | -4.899198 | -1.887613 |
| 52 | 6 | 0 | -2.267952 | 4.574791  | -0.047710 |
| 53 | 6 | 0 | 6.753166  | -2.752066 | 0.942084  |
| 54 | 1 | 0 | 7.772504  | -3.134928 | 1.061598  |
| 55 | 1 | 0 | 6.079181  | -3.615131 | 0.954061  |
| 56 | 6 | 0 | -6.521160 | 2.526275  | 1.226619  |
| 57 | 1 | 0 | -6.000994 | 2.835535  | 2.127995  |
| 58 | 6 | 0 | -7.692193 | 0.741878  | 0.053317  |
| 59 | 6 | 0 | -7.734113 | 1.583710  | -1.077326 |
| 60 | 1 | 0 | -8.210350 | 1.239807  | -1.991769 |
| 61 | 6 | 0 | 3.171582  | 2.893031  | 0.422700  |
| 62 | 6 | 0 | -5.062376 | 4.033810  | -0.096061 |
| 63 | 6 | 0 | -2.902207 | 4.139770  | -1.223519 |
| 64 | 1 | 0 | -2.302484 | 3.868759  | -2.087645 |
| 65 | 6 | 0 | 6.399423  | -1.843143 | 2.215338  |
| 66 | 1 | 0 | 5.376617  | -2.077091 | 2.527560  |
| 67 | 1 | 0 | 7.062678  | -2.150556 | 3.032985  |
| 68 | 6 | 0 | -6.298767 | 3.217949  | 0.022501  |
| 69 | 6 | 0 | 6.665119  | 1.987333  | 0.360562  |
| 70 | 6 | 0 | -4.465031 | 4.673315  | 1.007084  |
| 71 | 1 | 0 | -5.061153 | 4.899278  | 1.887418  |
| 72 | 6 | 0 | 7.811509  | 1.407896  | 0.913203  |
| 73 | 1 | 0 | 8.787606  | 1.767337  | 0.594372  |
| 74 | 6 | 0 | 7.740107  | 0.262619  | 1.706663  |
| 75 | 1 | 0 | 8.660318  | -0.236994 | 2.002214  |
| 76 | 6 | 0 | -7.045986 | 2.793738  | -1.094184 |
| 77 | 1 | 0 | -7.003124 | 3.362065  | -2.019918 |
| 78 | 6 | 0 | -4.267047 | 3.874355  | -1.246077 |
| 79 | 1 | 0 | -4.688009 | 3.393236  | -2.123568 |



## SUPPORTING INFORMATION

|    |   |   |           |          |           |
|----|---|---|-----------|----------|-----------|
| 80 | 6 | 0 | -3.097915 | 4.931723 | 1.032339  |
| 81 | 1 | 0 | -2.656604 | 5.360154 | 1.928429  |
| 82 | 6 | 0 | 6.753124  | 2.752267 | -0.941762 |
| 83 | 1 | 0 | 7.772264  | 3.135804 | -1.060778 |
| 84 | 1 | 0 | 6.078544  | 3.614848 | -0.953979 |
| 85 | 6 | 0 | -0.801995 | 4.403672 | 0.104160  |
| 86 | 6 | 0 | -0.301024 | 3.883553 | 1.312923  |
| 87 | 1 | 0 | -0.974048 | 3.750021 | 2.154440  |
| 88 | 6 | 0 | 1.008483  | 3.439509 | 1.422606  |
| 89 | 1 | 0 | 1.356290  | 2.992783 | 2.348830  |
| 90 | 6 | 0 | 1.885396  | 3.499961 | 0.320317  |
| 91 | 6 | 0 | 1.417045  | 4.102433 | -0.864442 |
| 92 | 1 | 0 | 2.085005  | 4.189599 | -1.716200 |
| 93 | 6 | 0 | 0.100586  | 4.542178 | -0.966320 |
| 94 | 1 | 0 | -0.240433 | 4.976919 | -1.902130 |

Optimized S<sub>0</sub> geometry of compound *pm*-PCP-[6]CPP.

| Center<br>Number | Atomic<br>Number | Atomic<br>Type | Coordinates (Angstroms) |           |           |
|------------------|------------------|----------------|-------------------------|-----------|-----------|
|                  |                  |                | X                       | Y         | Z         |
| 1                | 6                | 0              | -2.135384               | -4.319565 | 0.006016  |
| 2                | 6                | 0              | -4.455768               | 0.525757  | -1.310517 |
| 3                | 6                | 0              | -4.455564               | -0.526120 | 1.310548  |
| 4                | 6                | 0              | -5.079920               | -1.761867 | 0.988934  |
| 5                | 6                | 0              | 0.584923                | -5.100070 | -0.292550 |
| 6                | 6                | 0              | -5.080579               | 1.761251  | -0.988865 |
| 7                | 6                | 0              | -5.255556               | 0.455645  | 1.901500  |
| 8                | 1                | 0              | -4.790876               | 1.377898  | 2.242079  |
| 9                | 6                | 0              | -4.244902               | -2.849584 | 0.579801  |
| 10               | 6                | 0              | 4.776307                | -4.279062 | -0.070811 |
| 11               | 6                | 0              | -6.485208               | -1.822315 | 0.936429  |
| 12               | 1                | 0              | -6.947700               | -2.717386 | 0.527782  |
| 13               | 6                | 0              | -0.221603               | -5.640338 | 0.727475  |
| 14               | 1                | 0              | 0.209995                | -6.330277 | 1.447410  |
| 15               | 6                | 0              | -1.551507               | -5.257140 | 0.880742  |
| 16               | 1                | 0              | -2.128934               | -5.632180 | 1.720344  |
| 17               | 6                | 0              | -5.255397               | -0.456296 | -1.901499 |
| 18               | 1                | 0              | -4.790367               | -1.378356 | -2.242123 |
| 19               | 6                | 0              | -4.245991               | 2.849301  | -0.579730 |
| 20               | 6                | 0              | -3.356192               | -3.638354 | 0.306528  |
| 21               | 6                | 0              | -2.136742               | 4.319613  | -0.006032 |
| 22               | 6                | 0              | -7.274349               | -0.702547 | 1.230951  |
| 23               | 6                | 0              | -6.646251               | -0.370995 | -1.876054 |

## SUPPORTING INFORMATION

|    |   |   |           |           |           |
|----|---|---|-----------|-----------|-----------|
| 24 | 1 | 0 | -7.235860 | -1.221739 | -2.211329 |
| 25 | 6 | 0 | 2.068631  | -5.155787 | -0.271404 |
| 26 | 6 | 0 | -3.084142 | 0.151980  | -0.785490 |
| 27 | 1 | 0 | -2.342883 | 0.935617  | -0.969629 |
| 28 | 1 | 0 | -2.745416 | -0.748695 | -1.306558 |
| 29 | 6 | 0 | 5.894301  | -3.309052 | 0.070537  |
| 30 | 6 | 0 | 2.766907  | -5.211351 | 0.949467  |
| 31 | 1 | 0 | 2.237366  | -5.467451 | 1.862404  |
| 32 | 6 | 0 | -3.357557 | 3.638371  | -0.306432 |
| 33 | 6 | 0 | -7.274618 | 0.701131  | -1.230916 |
| 34 | 6 | 0 | -3.084081 | -0.151848 | 0.785501  |
| 35 | 1 | 0 | -2.342532 | -0.935209 | 0.969643  |
| 36 | 1 | 0 | -2.745681 | 0.748955  | 1.306556  |
| 37 | 6 | 0 | 0.583552  | 5.100191  | 0.292398  |
| 38 | 6 | 0 | -6.646384 | 0.369824  | 1.876066  |
| 39 | 1 | 0 | -7.236305 | 1.220361  | 2.211320  |
| 40 | 6 | 0 | 5.981190  | -2.539461 | 1.245549  |
| 41 | 1 | 0 | 5.431441  | -2.840350 | 2.131135  |
| 42 | 6 | 0 | 4.092057  | -4.798892 | 1.044693  |
| 43 | 1 | 0 | 4.562080  | -4.785951 | 2.023765  |
| 44 | 6 | 0 | -1.552877 | 5.257028  | -0.880921 |
| 45 | 1 | 0 | -2.130317 | 5.631940  | -1.720573 |
| 46 | 6 | 0 | 6.668078  | -2.871274 | -1.023630 |
| 47 | 1 | 0 | 6.730993  | -3.480216 | -1.921406 |
| 48 | 6 | 0 | -1.377265 | -3.896510 | -1.103512 |
| 49 | 1 | 0 | -1.816801 | -3.199023 | -1.810105 |
| 50 | 6 | 0 | -6.485896 | 1.821184  | -0.936370 |
| 51 | 1 | 0 | -6.948718 | 2.716079  | -0.527710 |
| 52 | 6 | 0 | 6.582852  | -1.287431 | 1.246151  |
| 53 | 1 | 0 | 6.475790  | -0.662351 | 2.127445  |
| 54 | 6 | 0 | 7.121937  | -0.739142 | 0.068736  |
| 55 | 6 | 0 | 2.833313  | -4.880274 | -1.419876 |
| 56 | 1 | 0 | 2.368349  | -4.917300 | -2.400801 |
| 57 | 6 | 0 | -0.222973 | 5.640263  | -0.727724 |
| 58 | 1 | 0 | 0.208595  | 6.330123  | -1.447756 |
| 59 | 6 | 0 | 4.148416  | -4.441624 | -1.320921 |
| 60 | 1 | 0 | 4.647723  | -4.103700 | -2.223627 |
| 61 | 6 | 0 | -1.378622 | 3.896758  | 1.103587  |
| 62 | 1 | 0 | -1.818182 | 3.199439  | 1.810328  |
| 63 | 6 | 0 | -0.049925 | -4.273889 | -1.241107 |
| 64 | 1 | 0 | 0.531041  | -3.833609 | -2.044663 |
| 65 | 6 | 0 | 7.264306  | -1.613031 | -1.026751 |
| 66 | 1 | 0 | 7.767124  | -1.270775 | -1.927760 |
| 67 | 6 | 0 | -0.051293 | 4.274190  | 1.241122  |
| 68 | 1 | 0 | 0.529665  | 3.834131  | 2.044806  |
| 69 | 6 | 0 | 7.121695  | 0.740206  | -0.068571 |
| 70 | 6 | 0 | 2.067263  | 5.155953  | 0.271247  |
| 71 | 6 | 0 | 6.582537  | 1.288326  | -1.246024 |
| 72 | 1 | 0 | 6.475729  | 0.663215  | -2.127330 |

## SUPPORTING INFORMATION

|    |   |   |           |           |           |
|----|---|---|-----------|-----------|-----------|
| 73 | 6 | 0 | 4.775060  | 4.279516  | 0.070788  |
| 74 | 6 | 0 | 5.893272  | 3.309744  | -0.070480 |
| 75 | 6 | 0 | 7.263709  | 1.614139  | 1.026930  |
| 76 | 1 | 0 | 7.766571  | 1.272051  | 1.927978  |
| 77 | 6 | 0 | 4.147117  | 4.442122  | 1.320863  |
| 78 | 1 | 0 | 4.646442  | 4.104381  | 2.223625  |
| 79 | 6 | 0 | 2.831960  | 4.880631  | 1.419749  |
| 80 | 1 | 0 | 2.366991  | 4.917722  | 2.400672  |
| 81 | 6 | 0 | 2.765536  | 5.211413  | -0.949631 |
| 82 | 1 | 0 | 2.235984  | 5.467352  | -1.862609 |
| 83 | 6 | 0 | -8.646270 | -0.522460 | 0.608273  |
| 84 | 1 | 0 | -9.384203 | -0.172862 | 1.340848  |
| 85 | 1 | 0 | -9.003648 | -1.489836 | 0.238476  |
| 86 | 6 | 0 | 4.090737  | 4.799100  | -1.044788 |
| 87 | 1 | 0 | 4.560760  | 4.786104  | -2.023855 |
| 88 | 6 | 0 | 5.980493  | 2.540183  | -1.245475 |
| 89 | 1 | 0 | 5.430739  | 2.840884  | -2.131120 |
| 90 | 6 | 0 | -8.646469 | 0.520509  | -0.608243 |
| 91 | 1 | 0 | -9.384262 | 0.170629  | -1.340823 |
| 92 | 1 | 0 | -9.004225 | 1.487745  | -0.238445 |
| 93 | 6 | 0 | 6.667096  | 2.872194  | 1.023754  |
| 94 | 1 | 0 | 6.729780  | 3.481156  | 1.921529  |

### 2.9 <sup>1</sup>H and <sup>13</sup>C NMR Spectra

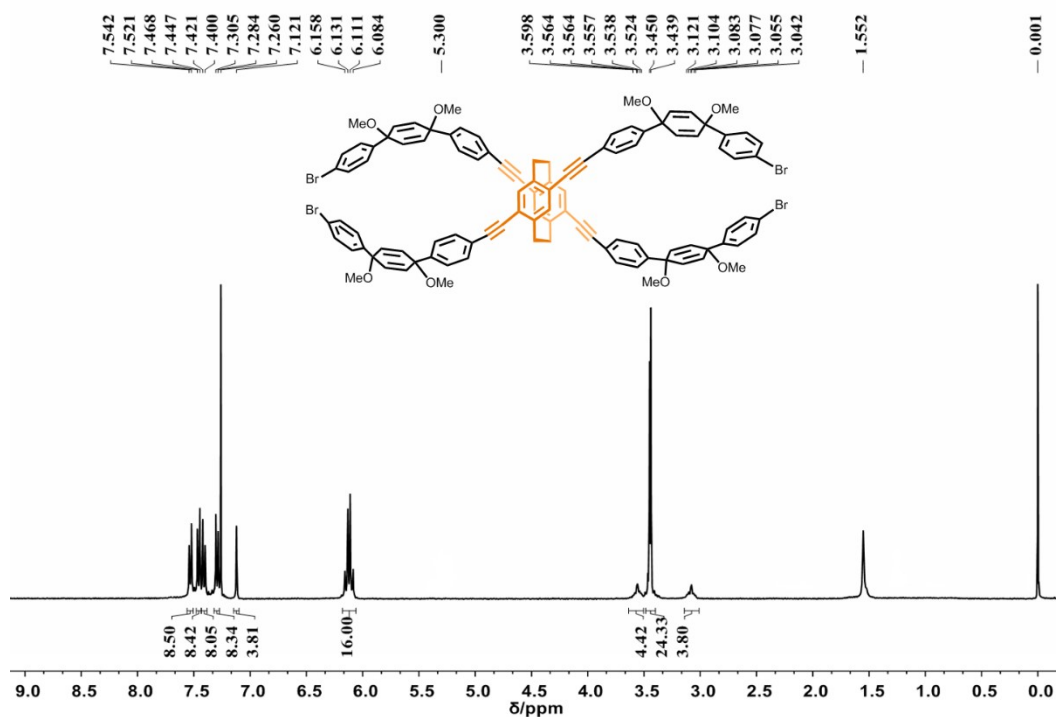

Fig. S24 <sup>1</sup>H NMR spectrum of compound *bis-po-4* in CDCl<sub>3</sub> (400 MHz, 298 K).

# SUPPORTING INFORMATION

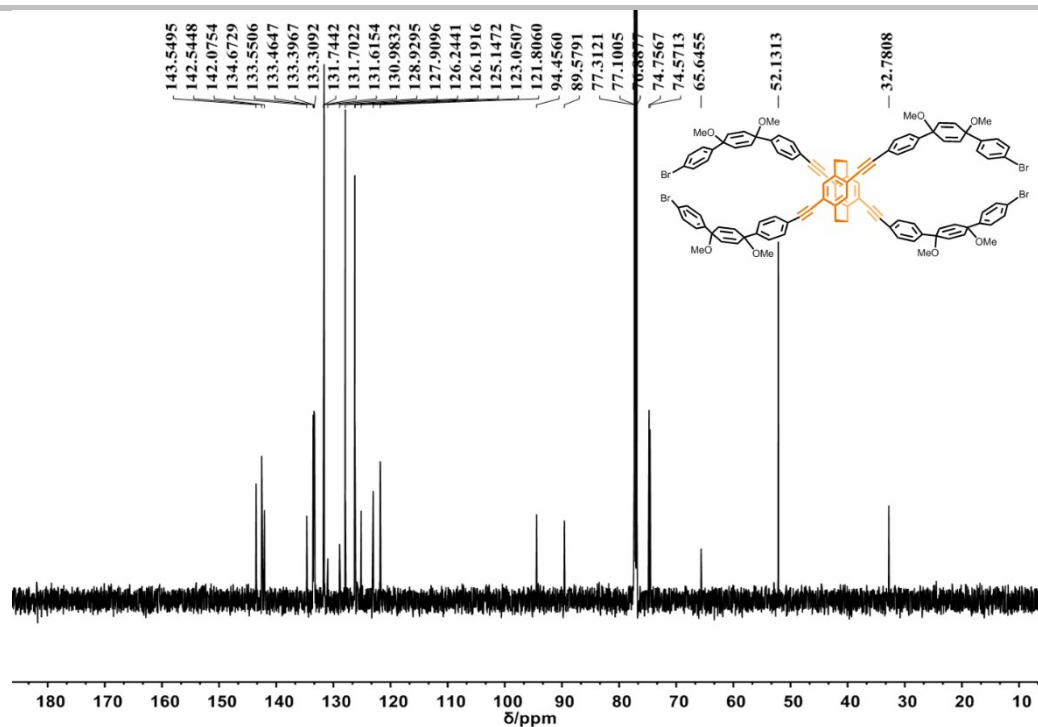

Fig. S25  $^{13}\text{C}$  NMR spectrum of compound *bis-po-4* in  $\text{CDCl}_3$  (150 MHz, 298 K).

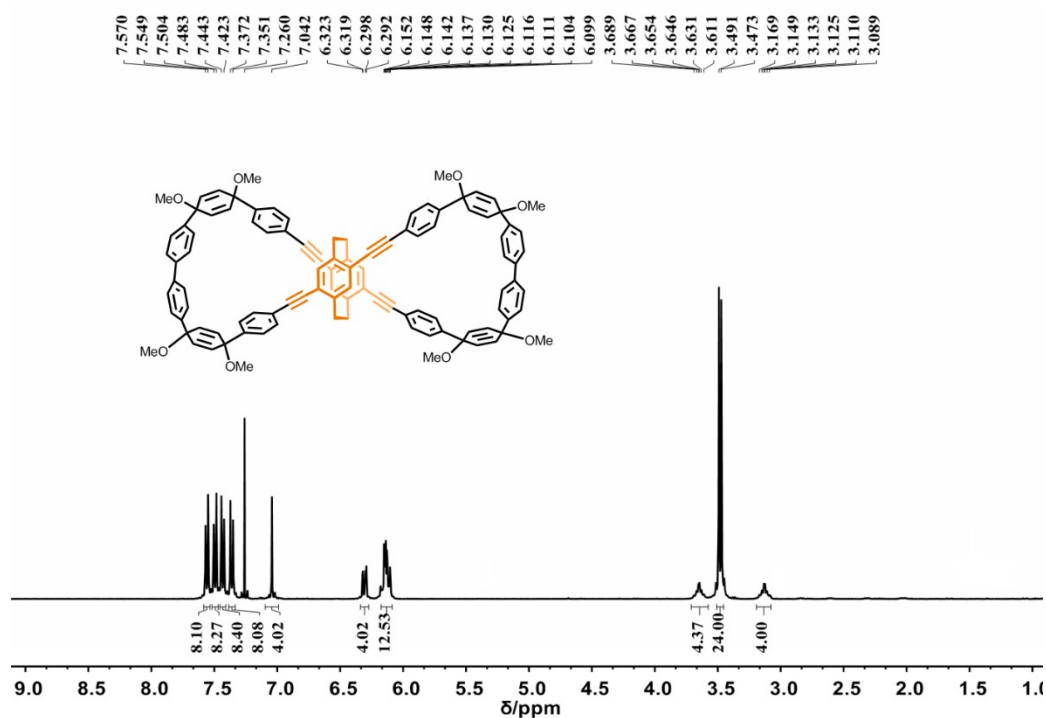

Fig. S26  $^1\text{H}$  NMR spectrum of compound *bis-po-5* in  $\text{CDCl}_3$  (400 MHz, 298 K).

# SUPPORTING INFORMATION

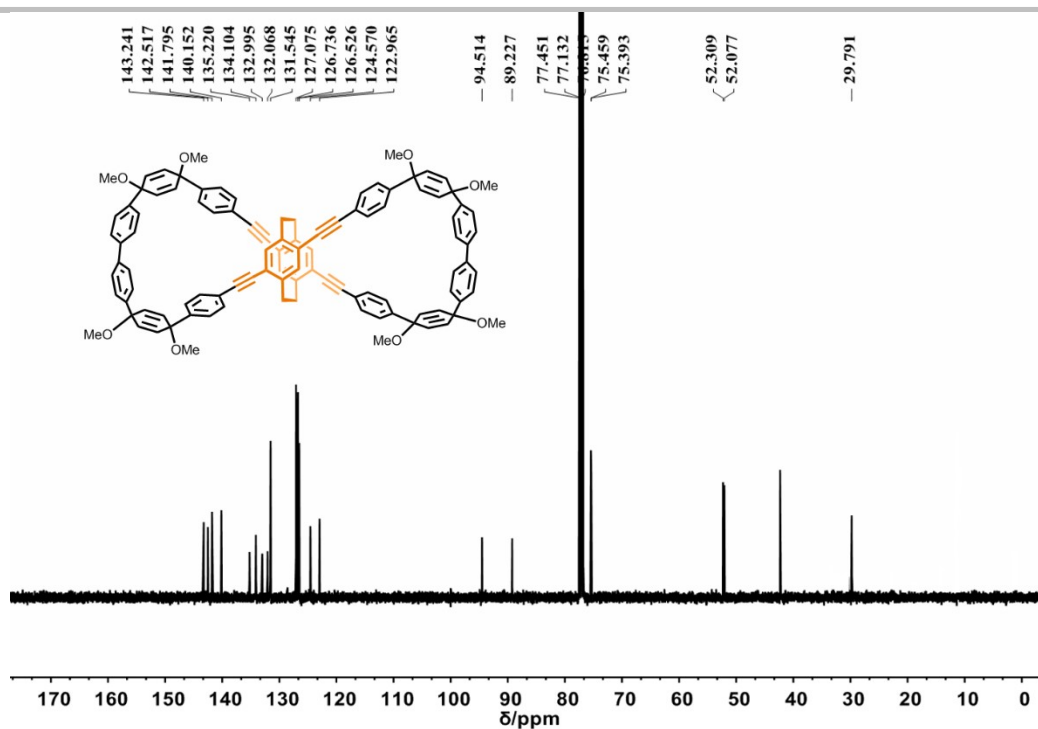

Fig. S27 <sup>13</sup>C NMR spectrum of compound *bis-po-5* in CDCl<sub>3</sub> (100 MHz, 298 K).

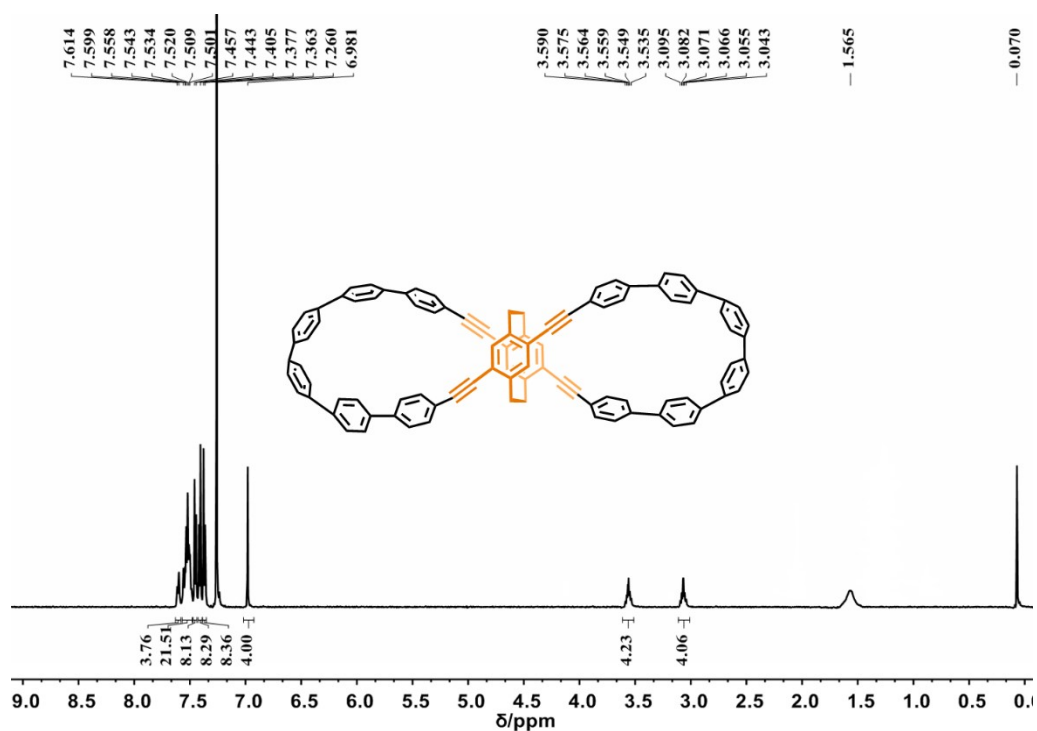

Fig. S28 <sup>1</sup>H NMR spectrum of compound *bis-po-CC* in CDCl<sub>3</sub> (600 MHz, 298 K).

# SUPPORTING INFORMATION

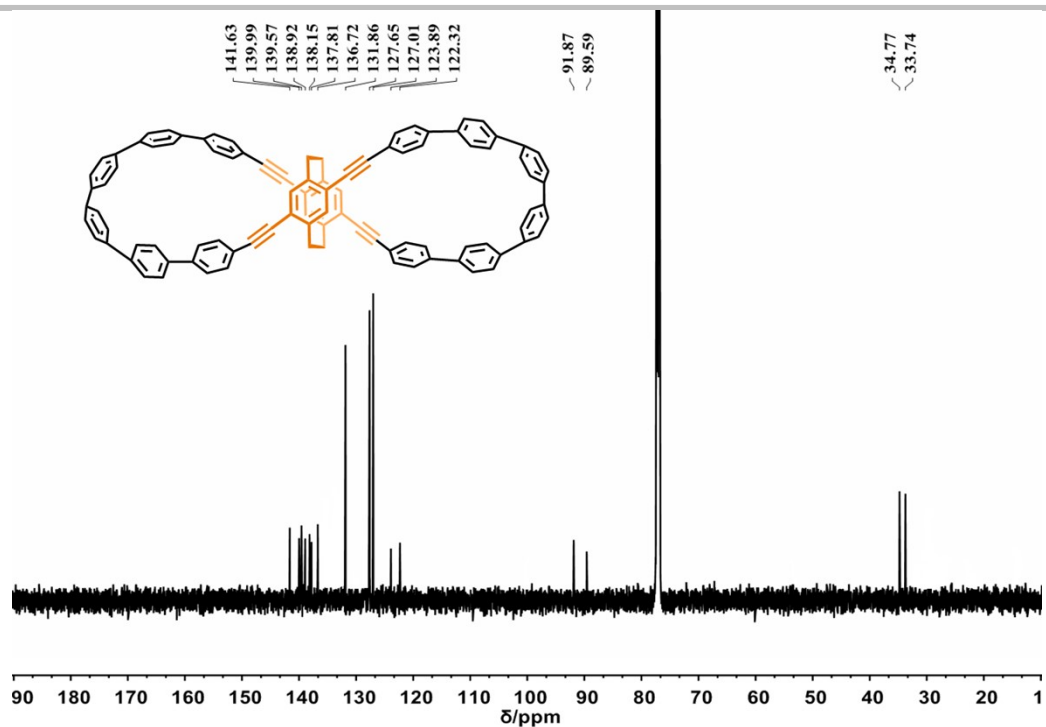

Fig. S29  $^{13}\text{C}$  NMR spectrum of compound *bis-po-CC* in  $\text{CDCl}_3$  (150 MHz, 298 K).

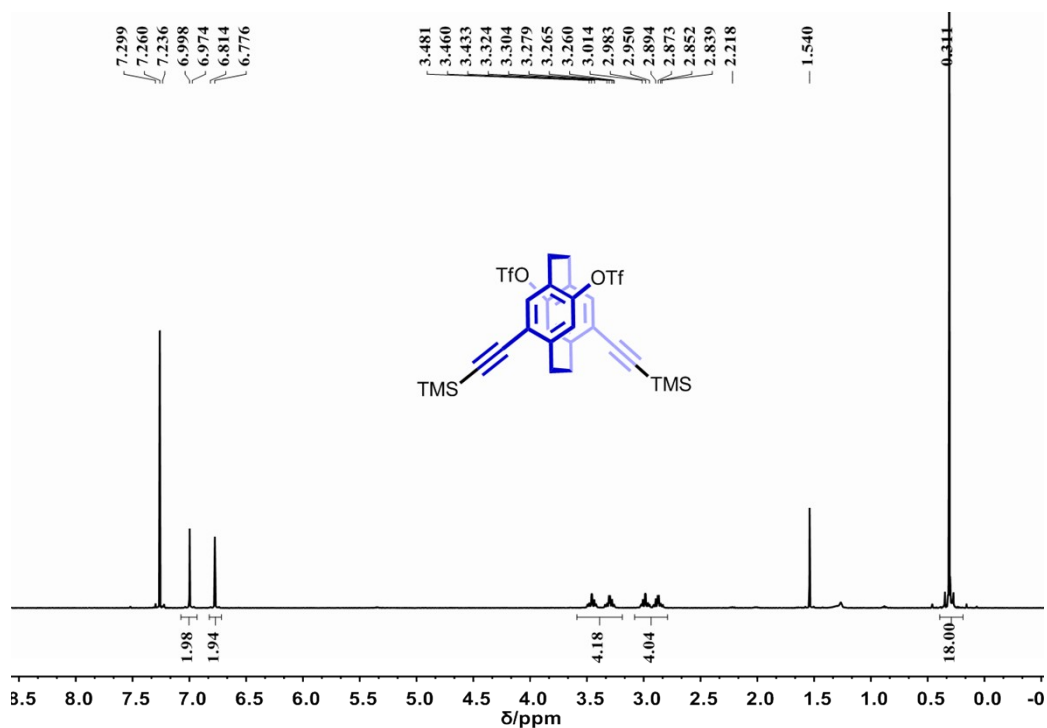

Fig. S30  $^1\text{H}$  NMR spectrum of compound *bis-pm-4* in  $\text{CDCl}_3$  (600 MHz, 298 K).

# SUPPORTING INFORMATION

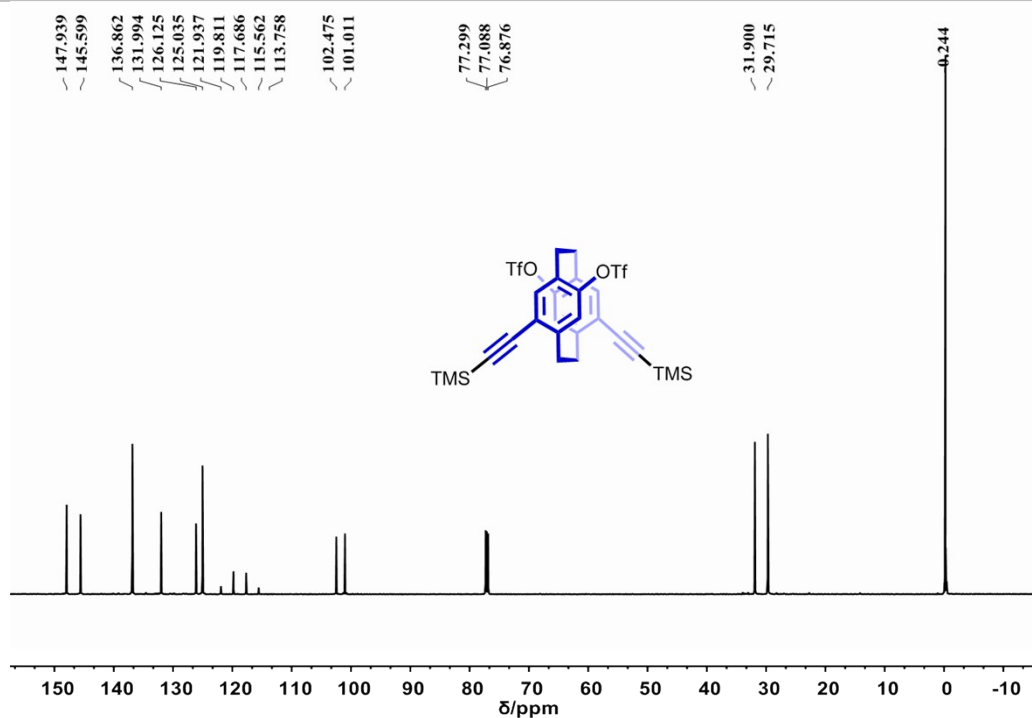

Fig. S31  $^{13}\text{C}$  NMR spectrum of compound *bis-pm-4* in  $\text{CDCl}_3$  (150 MHz, 298 K).

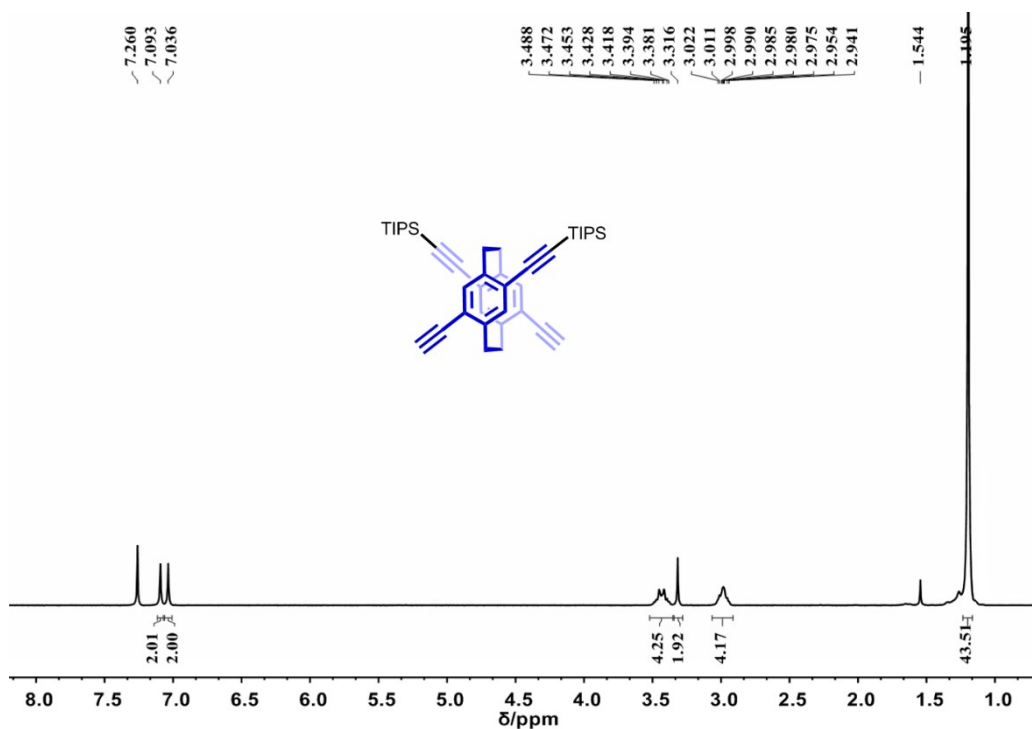

Fig. S32  $^1\text{H}$  NMR spectrum of compound *bis-pm-6* in  $\text{CDCl}_3$  (400 MHz, 298 K).

# SUPPORTING INFORMATION

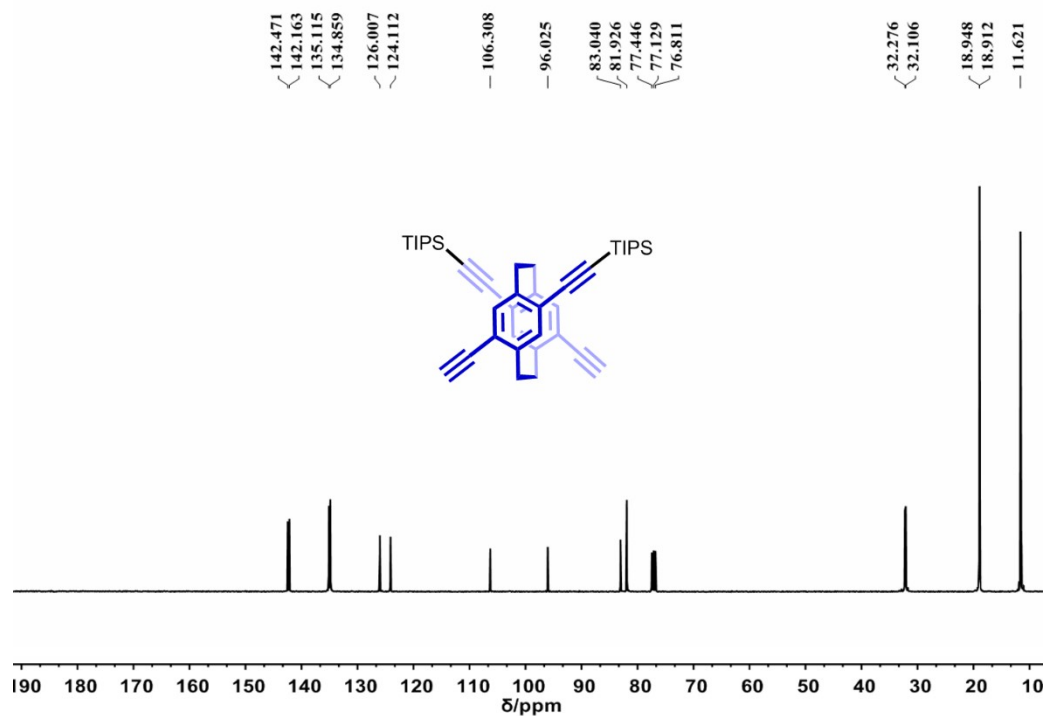

Fig. S33  $^{13}\text{C}$  NMR spectrum of compound *bis-pm-6* in  $\text{CDCl}_3$  (100 MHz, 298 K).

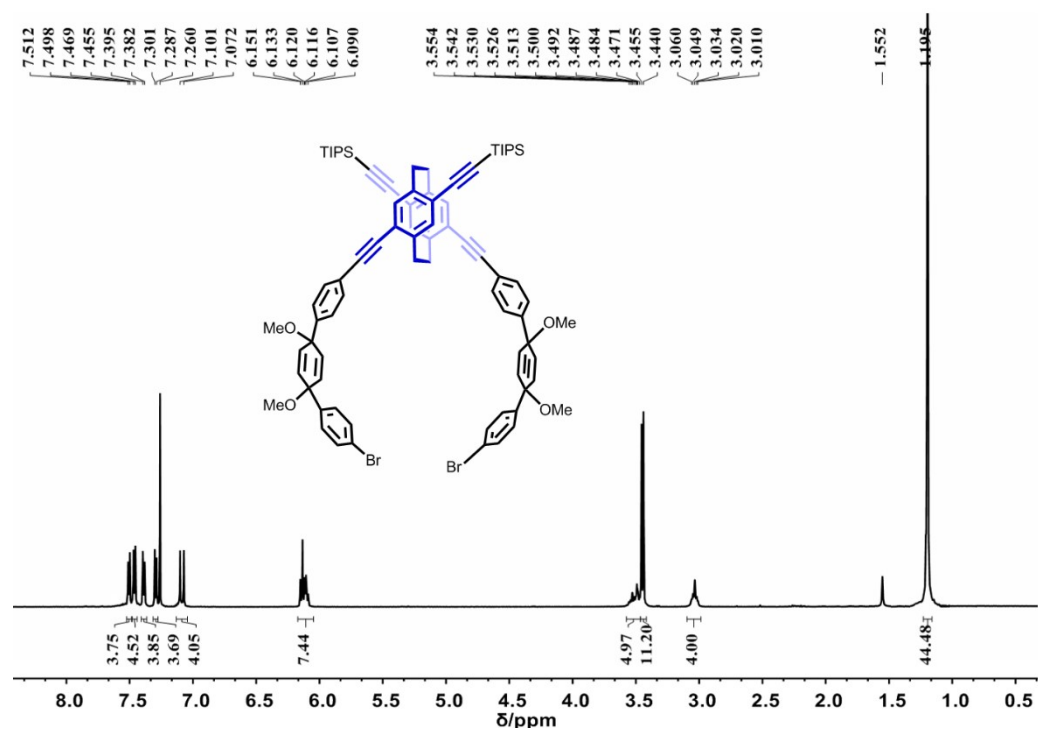

Fig. S34  $^1\text{H}$  NMR spectrum of compound *bis-pm-7* in  $\text{CDCl}_3$  (600 MHz, 298 K).



# SUPPORTING INFORMATION

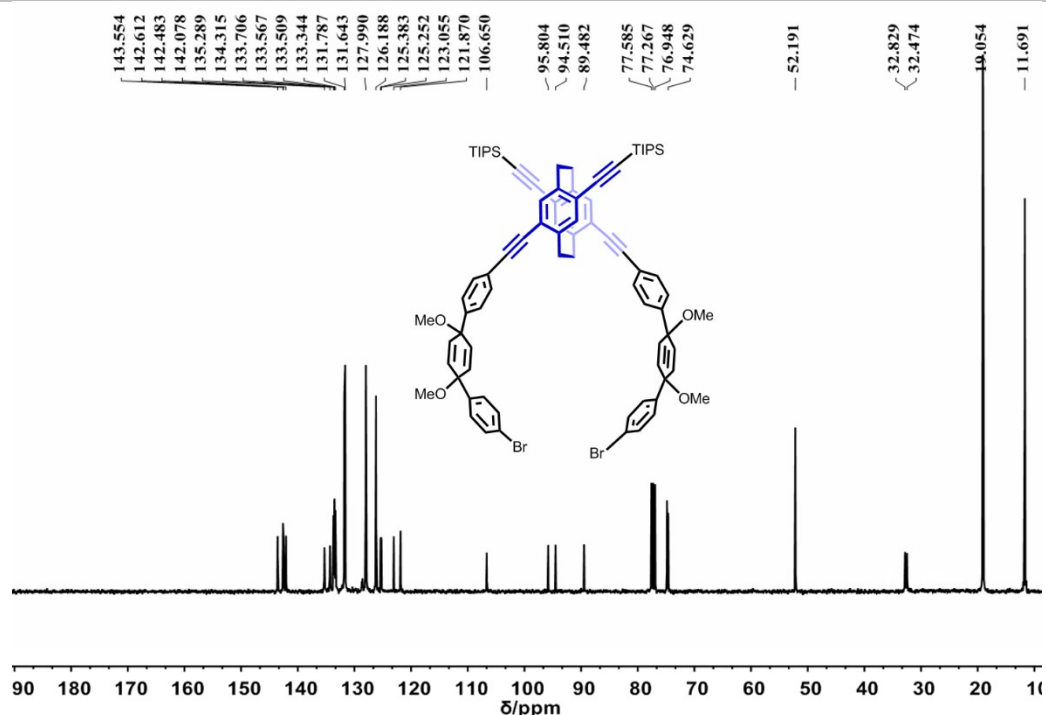

Fig. S35 <sup>13</sup>C NMR spectrum of compound *bis-pm-7* in CDCl<sub>3</sub> (100 MHz, 298 K).

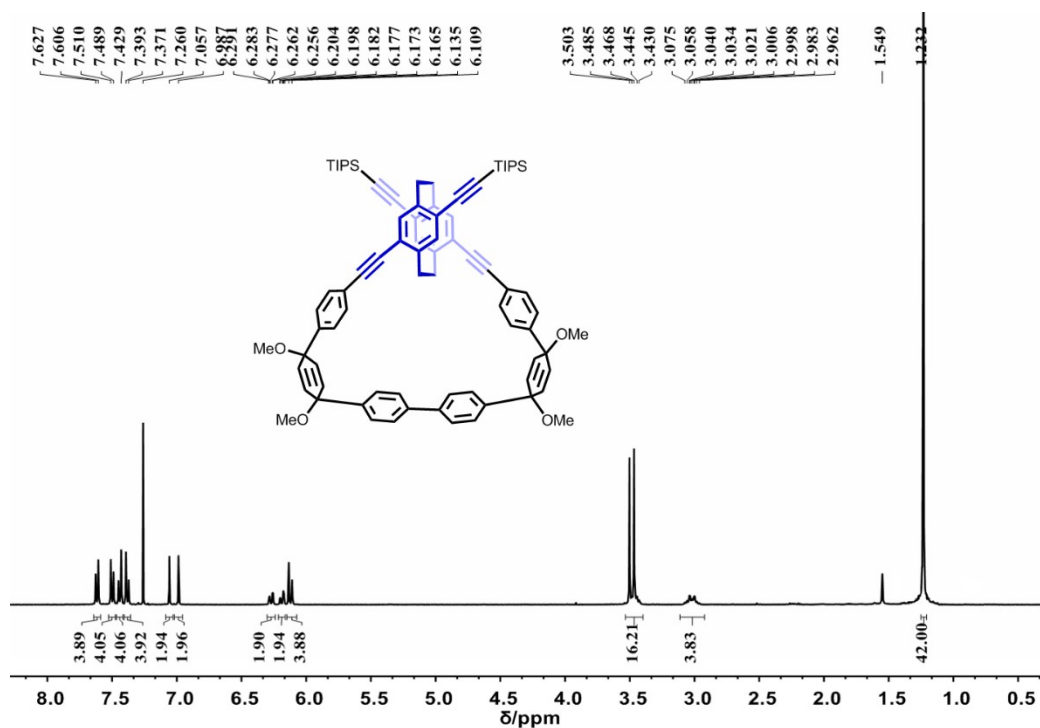

Fig. S36 <sup>1</sup>H NMR spectrum of compound *bis-pm-8* in CDCl<sub>3</sub> (600 MHz, 298 K).

# SUPPORTING INFORMATION

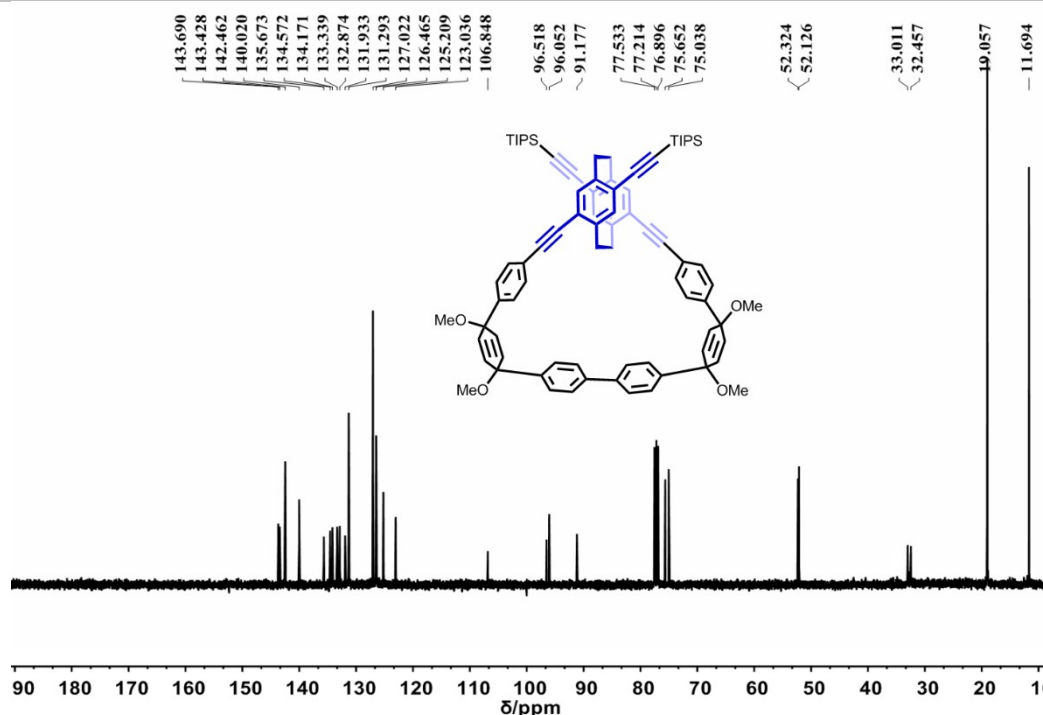

Fig. S37  $^{13}\text{C}$  NMR spectrum of compound *bis-pm-8* in  $\text{CDCl}_3$  (100 MHz, 298 K).

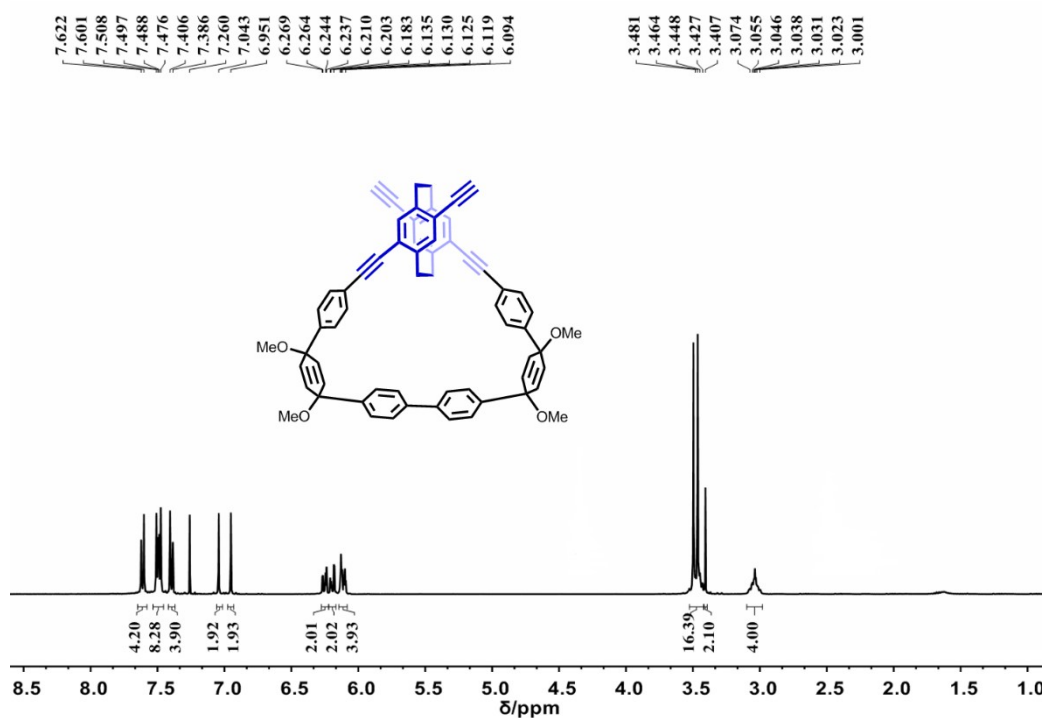

Fig. S38  $^1\text{H}$  NMR spectrum of compound *bis-pm-9* in  $\text{CDCl}_3$  (400 MHz, 298 K).

# SUPPORTING INFORMATION

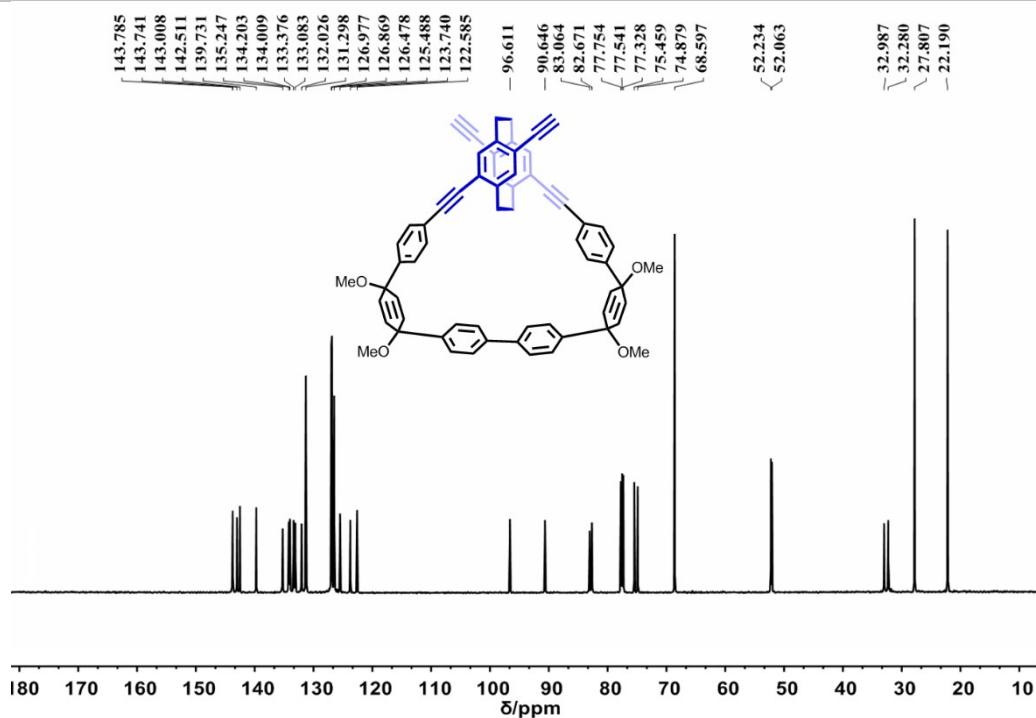

Fig. S39 <sup>13</sup>C NMR spectrum of compound *bis-pm-9* in CDCl<sub>3</sub> (150 MHz, 298 K).

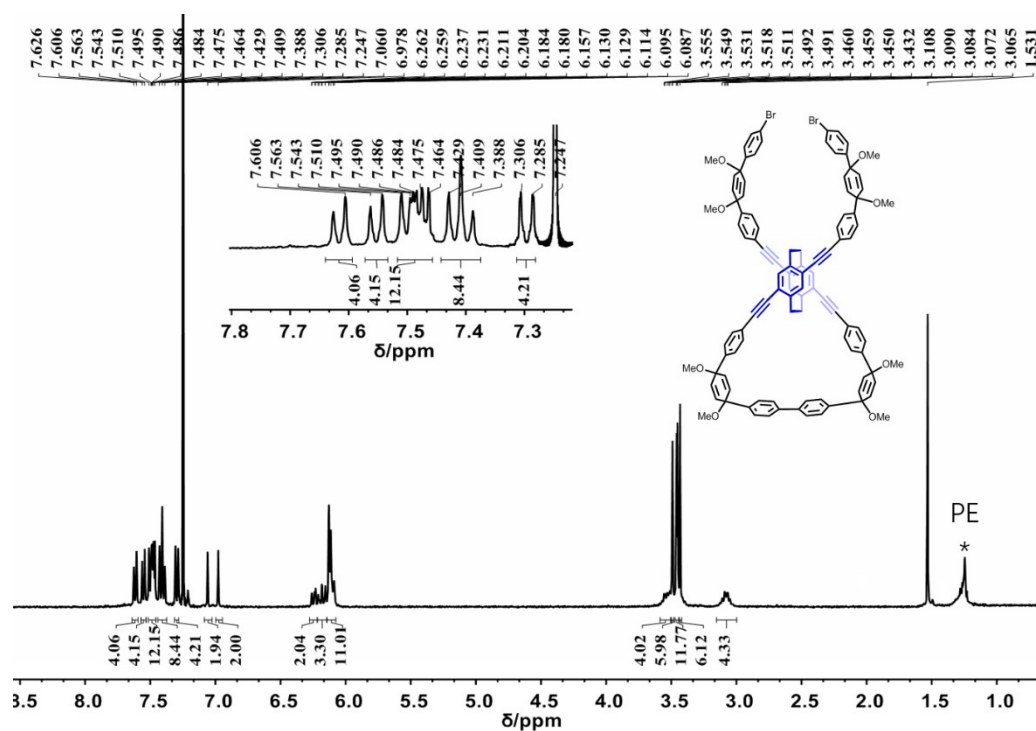

Fig. S40 <sup>1</sup>H NMR spectrum of compound *bis-pm-10* in CDCl<sub>3</sub> (400 MHz, 298 K).

# SUPPORTING INFORMATION

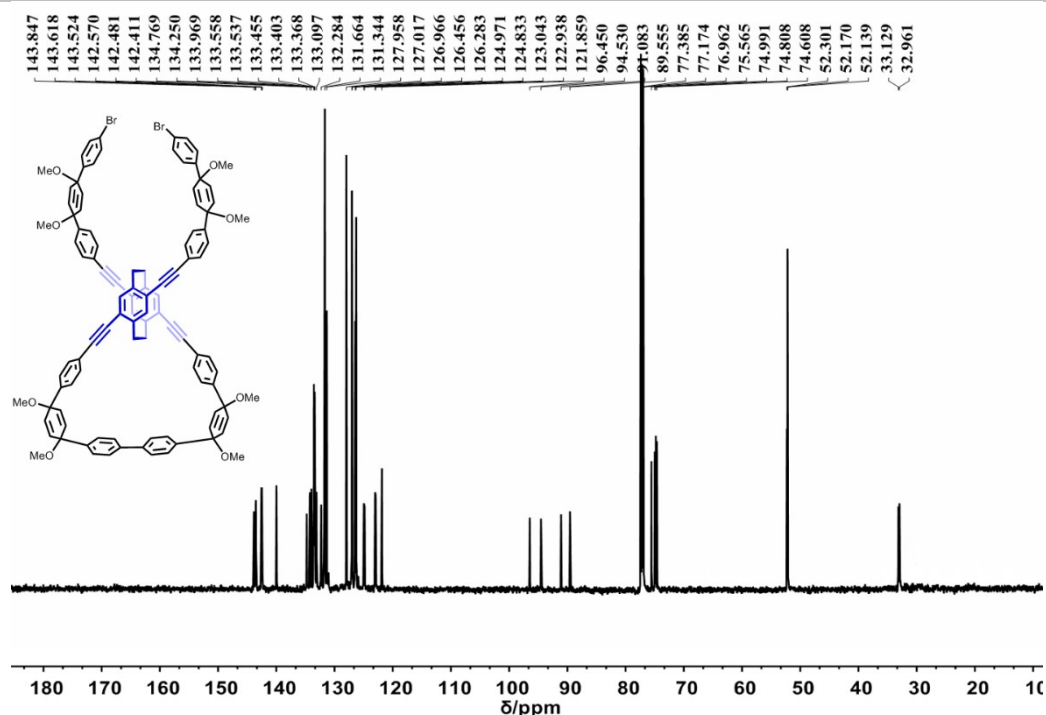

Fig. S41 <sup>13</sup>C NMR spectrum of compound *bis-pm-10* in CDCl<sub>3</sub> (150 MHz, 298 K).

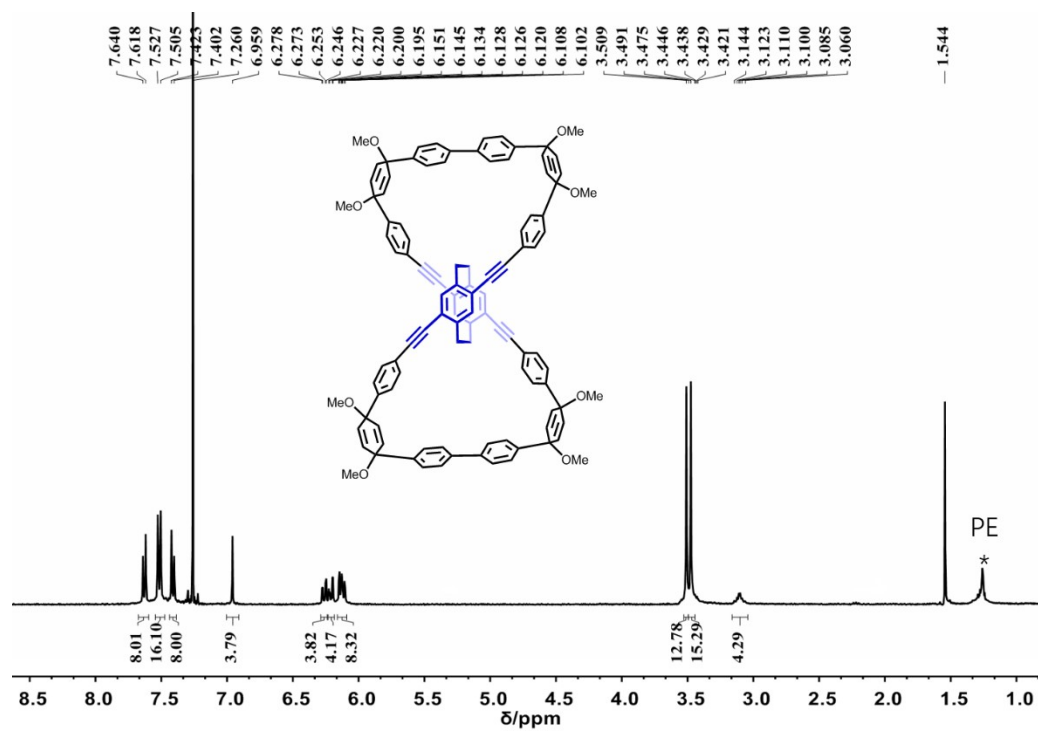

Fig. S42 <sup>1</sup>H NMR spectrum of compound *bis-pm-11* in CDCl<sub>3</sub> (400 MHz, 298 K).

# SUPPORTING INFORMATION

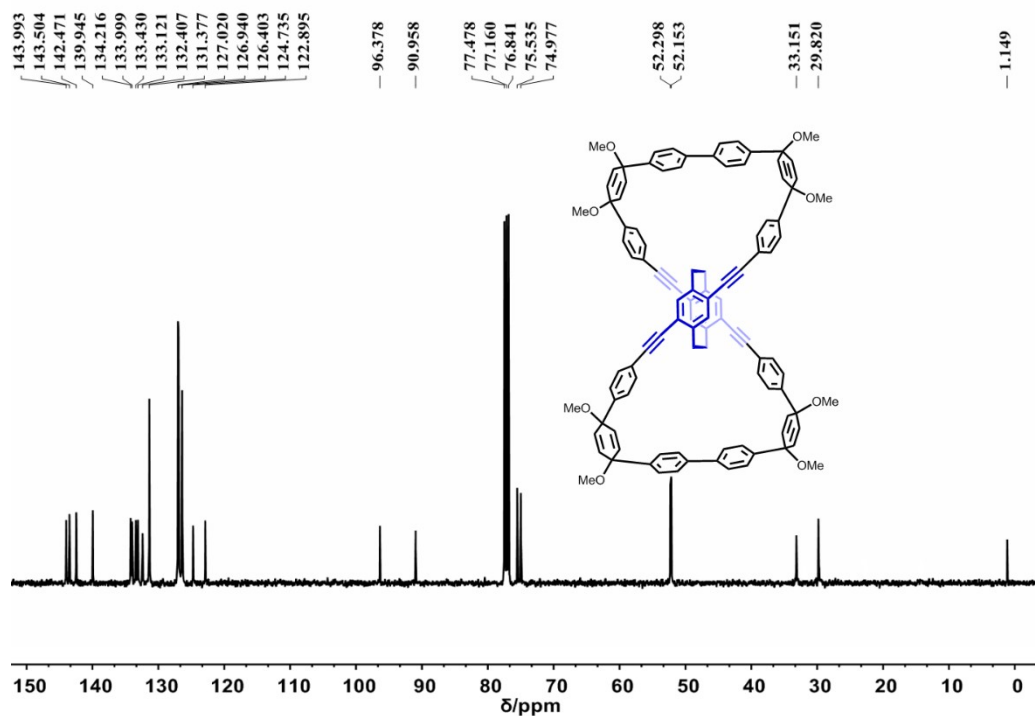

Fig. S43  $^{13}\text{C}$  NMR spectrum of compound *bis-pm-11* in  $\text{CDCl}_3$  (100 MHz, 298 K).

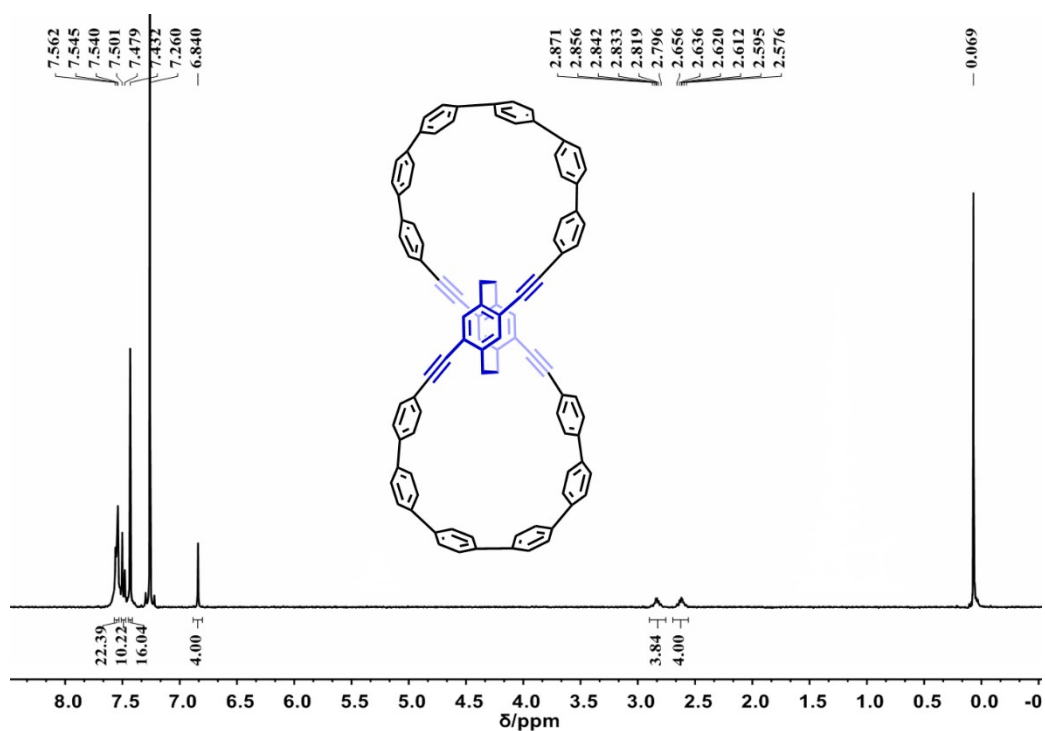

Fig. S44  $^1\text{H}$  NMR spectrum of compound *bis-pm-TC* in  $\text{CDCl}_3$  (400 MHz, 298 K).

## SUPPORTING INFORMATION

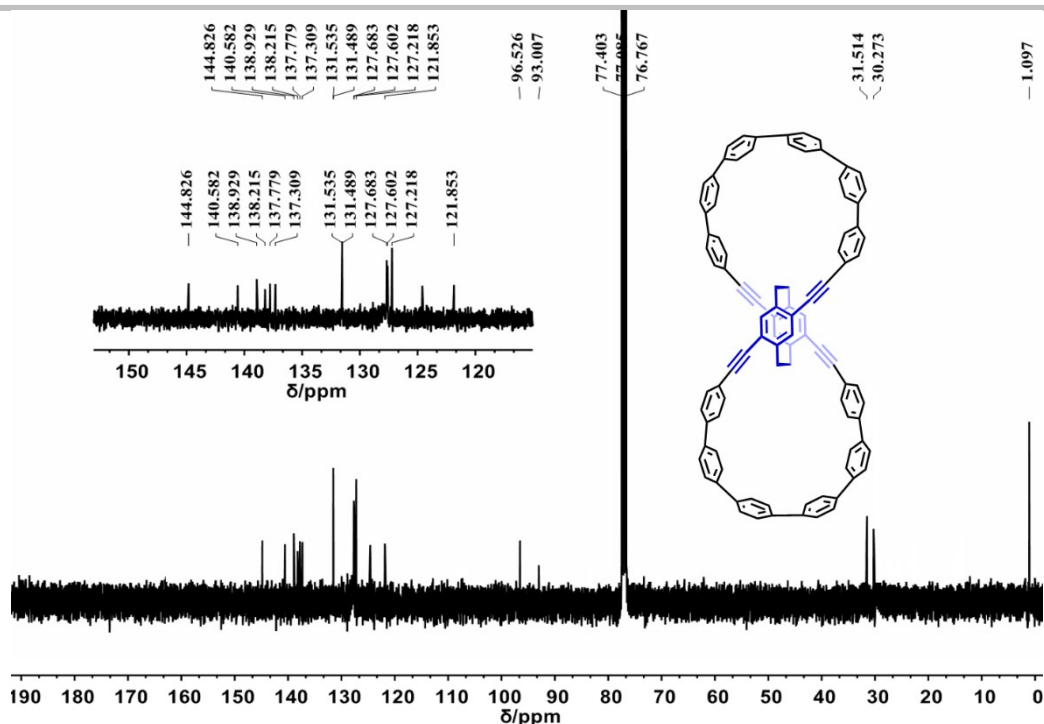

Fig. S45  $^{13}\text{C}$  NMR spectrum of compound *bis-pm-TC* in  $\text{CDCl}_3$  (100 MHz, 298 K).

## References

- [S1] He, J.; Yu, M.; Pang, M.; Fan, Y.; Lian, Z.; Wang, Y.; Wang, W.; Liu, Y.; Jiang, H. *Chem. Eur. J.* **2022**, *28*, e202103832.
- [S2] L. Bondarenko, I. Dix, H. Hinrichs, H. Hopf, *Synthesis* **2004**, *2004*, 2751-2759.
- [S3] R. Sawada, M. Gon, J. Nakamura, Y. Morisaki, Y. Chujo, *Chirality* **2018**, *30*, 1109–1114.
- [S4] O. V. Dolomanov, L. J. Bourhis, R. J. Gildea, J. A. K. Howard, H. Puschmann, *J. Appl. Cryst.* **2009**, *42*, 339-341.
- [S5] G. M. Sheldrick, *Acta Cryst.* **2015**, *A71*, 3-8.
- [S6] G. M. Sheldrick, *Acta Cryst.* **2015**, *C71*, 3-8.
- [S7] A. L. Spek, *Acta Cryst.* **2015**, *C71*, 9-18.
- [S8] a) J. P. Perdew, A. Ruzsinszky, J. M. Tao, V. N. Staroverov, G. E. Scuseria, G. I. Csonka, *J. Chem. Phys.* **2005**, *123*, 062201. b) A. Dreuw, M. Head-Gordon, *Chem. Rev.* **2005**, *105*, 4009-4037.
- [S9] a) R. E. Stratmann, G. E. Scuseria, M. J. Frisch, *J. Chem. Phys.* **1998**, *109*, 8218-8224. b) E. Runge, E. K. U. Gross, *Phys. Rev. Lett.* **1984**, *52*, 997-1000.
- [S10] a) A. D. Becke, *Phys. Rev. A*, **1988**, *38*, 3098-3100. (b) C. T. Lee, W. T. Yang, R. G. Parr, *Phys. Rev. B* **1988**, *37*, 785-789.
- [S11] Gaussian 09, Revision D.01, M. J. Frisch, G. W. Trucks, H. B. Schlegel, G. E. Scuseria, M. A. Robb, J. R. Cheeseman, G. Scalmani, V. Barone, B. Mennucci, G. A. Petersson, H. Nakatsuji, M. Caricato, X. Li, H. P. Hratchian, A. F. Izmaylov, J. Bloino, G. Zheng, J. L. Sonnenberg, M. Hada, M. Ehara, K. Toyota, R. Fukuda, J. Hasegawa, M. Ishida, T. Nakajima, Y. Honda, O. Kitao, H. Nakai, T. Vreven, J. A. Jr. Montgomery, J. E. Peralta, F. Ogliaro, M. Bearpark, J. J. Heyd, E. Brothers, K. N. Kudin, V. N. Staroverov, R. Kobayashi, J. Normand, K. Raghavachari, A. Rendell, J. C. Burant, S. S. Iyengar, J. Tomasi, M. Cossi, N. Rega, M. J. Millam, M. Klene, J. E. Knox, J. B. Cross, V. Bakken, C. Adamo, J. Jaramillo, R. Gomperts, R. E. Stratmann, O. Yazyev, A. J. Austin, R. Cammi, C. Pomelli, J. W. Ochterski, R. L. Martin, K. Morokuma, V. G. Zakrzewski, G. A. Voth, P. Salvador, J. J. Dannenberg, S. Dapprich, A. D. Daniels, Ö. Farkas, J. B. Foresman, J. V. Ortiz, J. Cioslowski, D. J. Fox, Gaussian 09, Revision D.01; Gaussian, Inc.: Wallingford, CT, 2009.
